# Supplementary material
Source: PubMed Central journal article supplement (PMC5294209)

DDPLTNLNTAFDV

parent: 717.834351,2+

MSGFScore: 35

QValue: 0

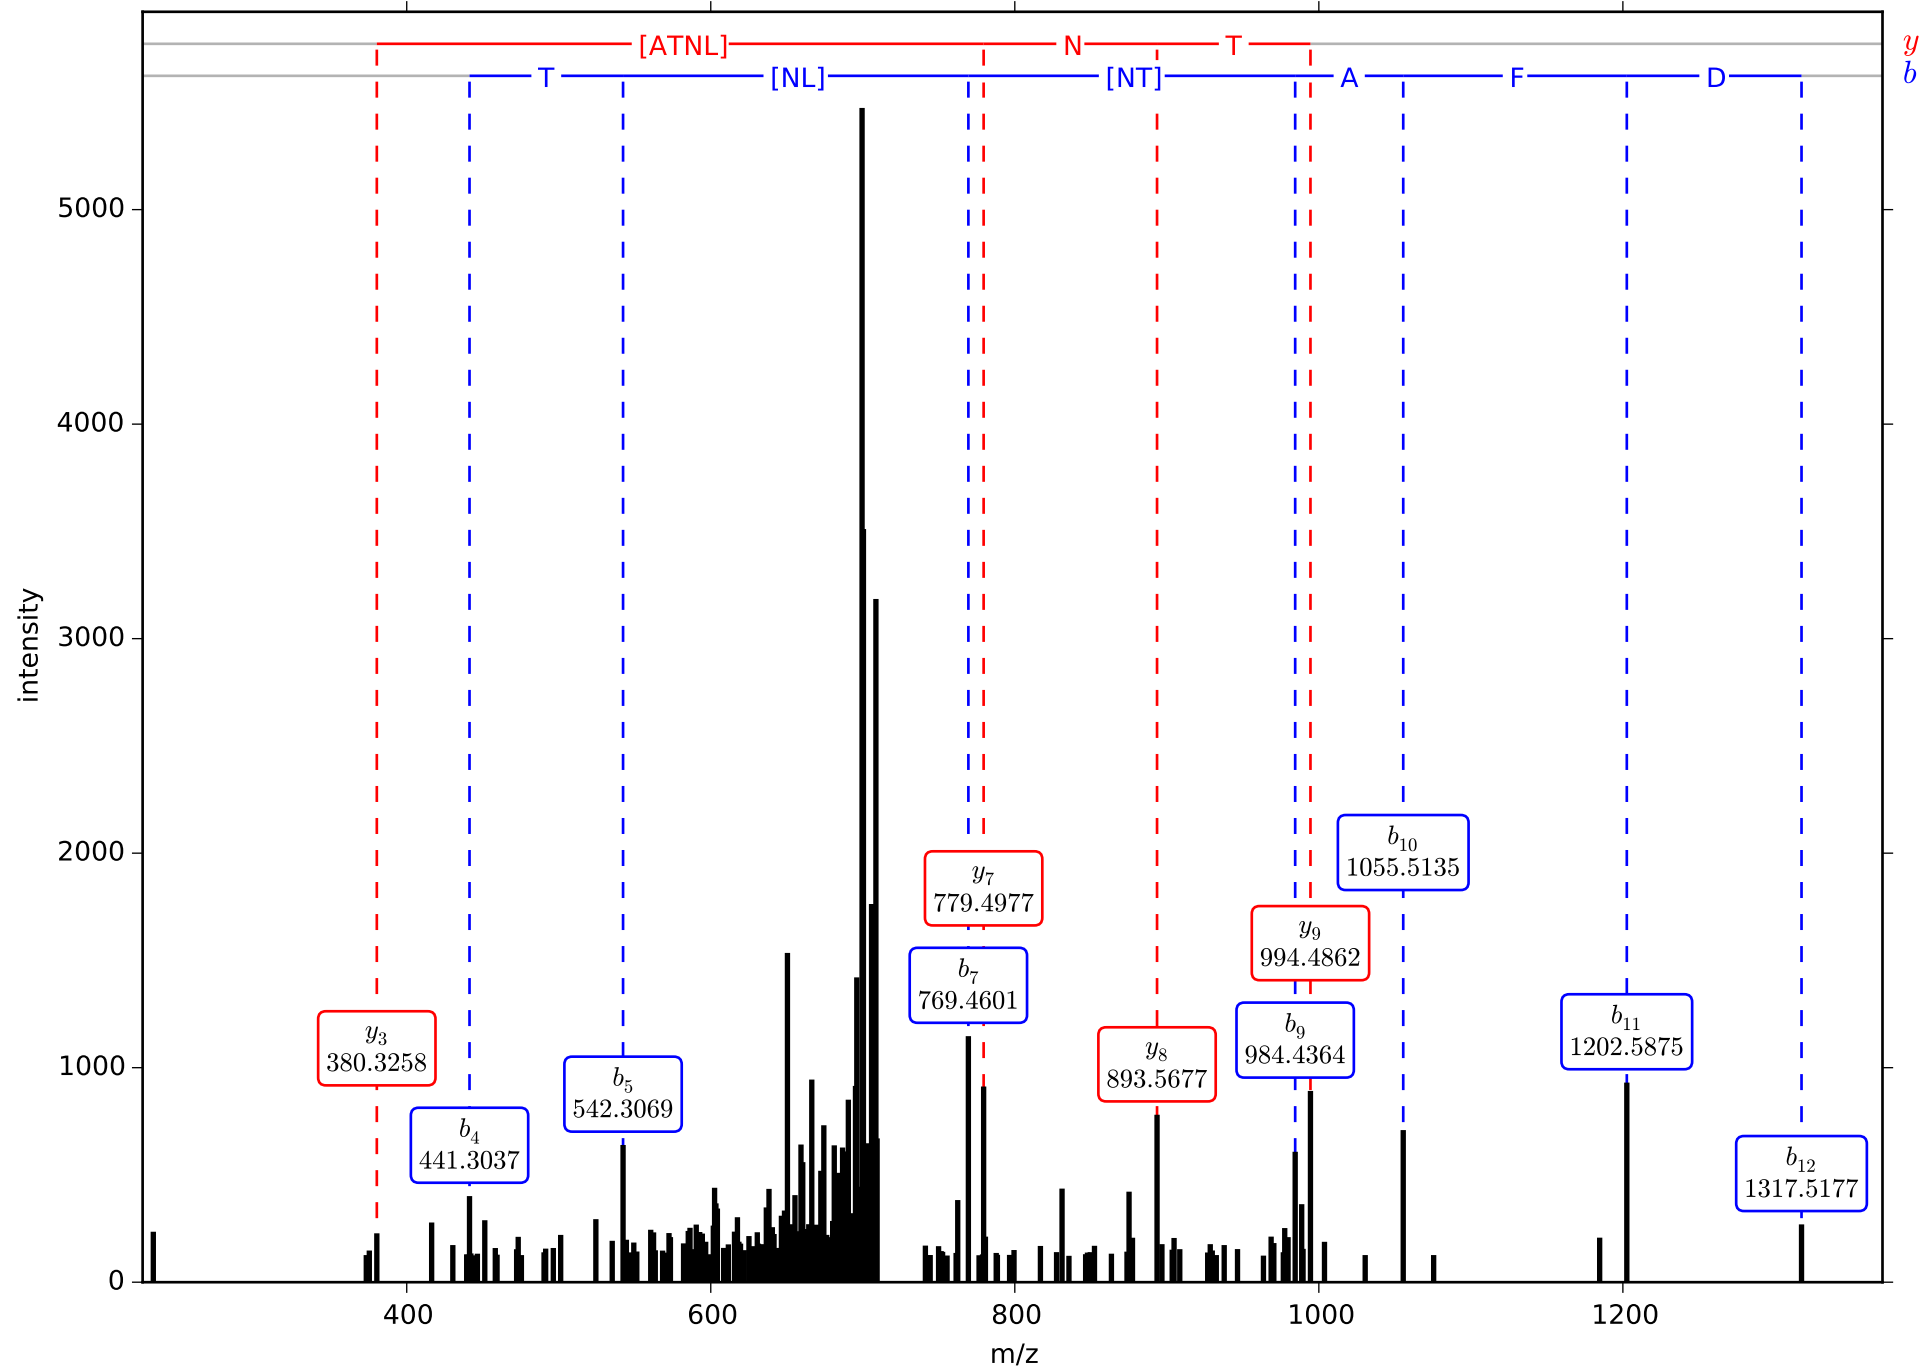

RPQYSNPPVQGEV

parent: 735.875366,2+

MSGFScore: 36

QValue: 0.00930044

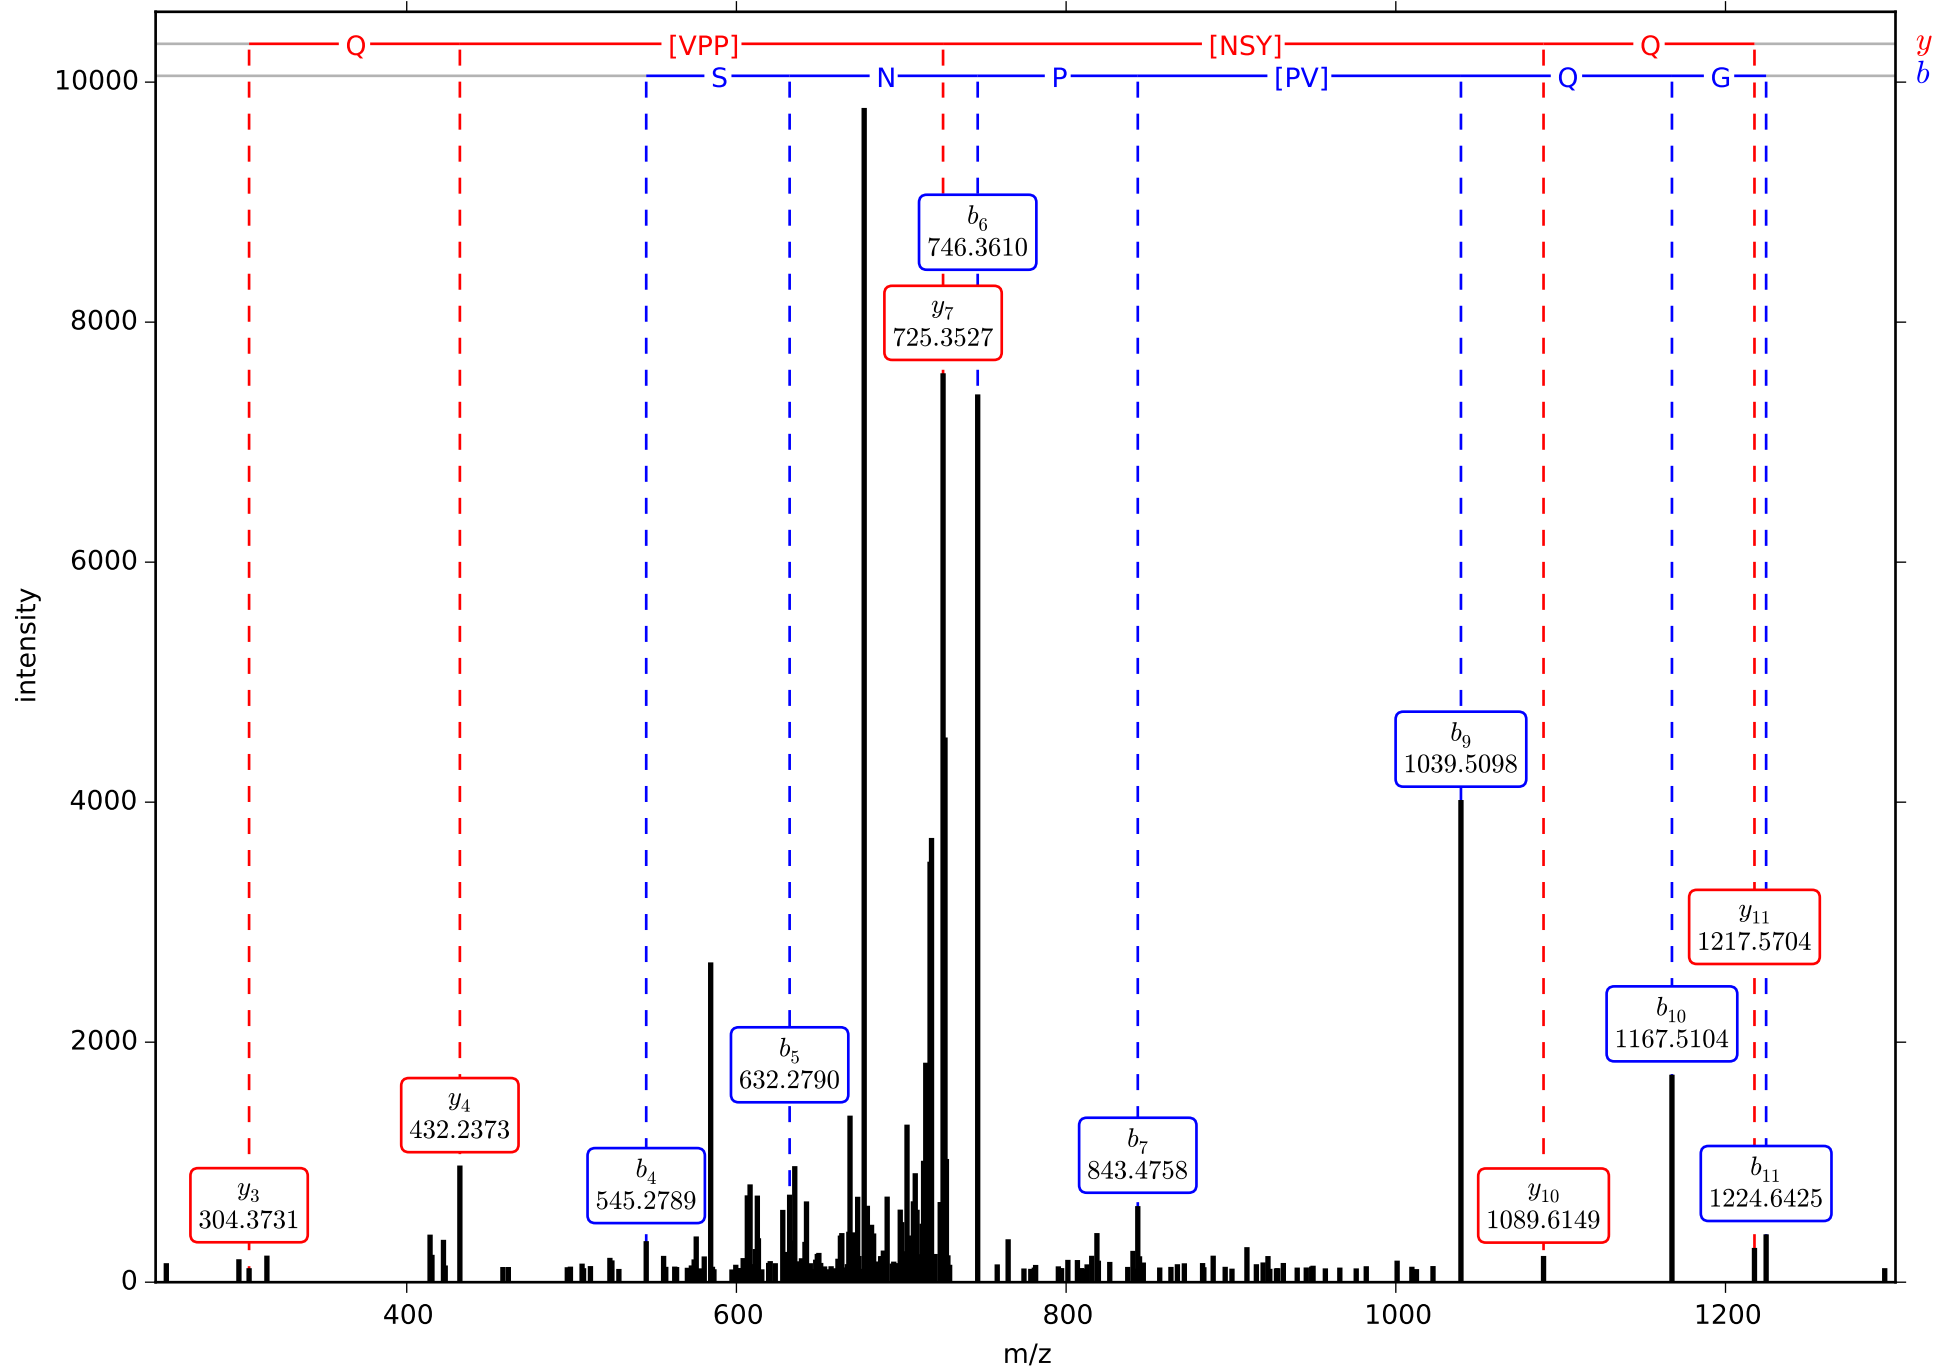

# KVADALTNAV

parent: 501.283264,2+

MSGFScore: 41

QValue: 0

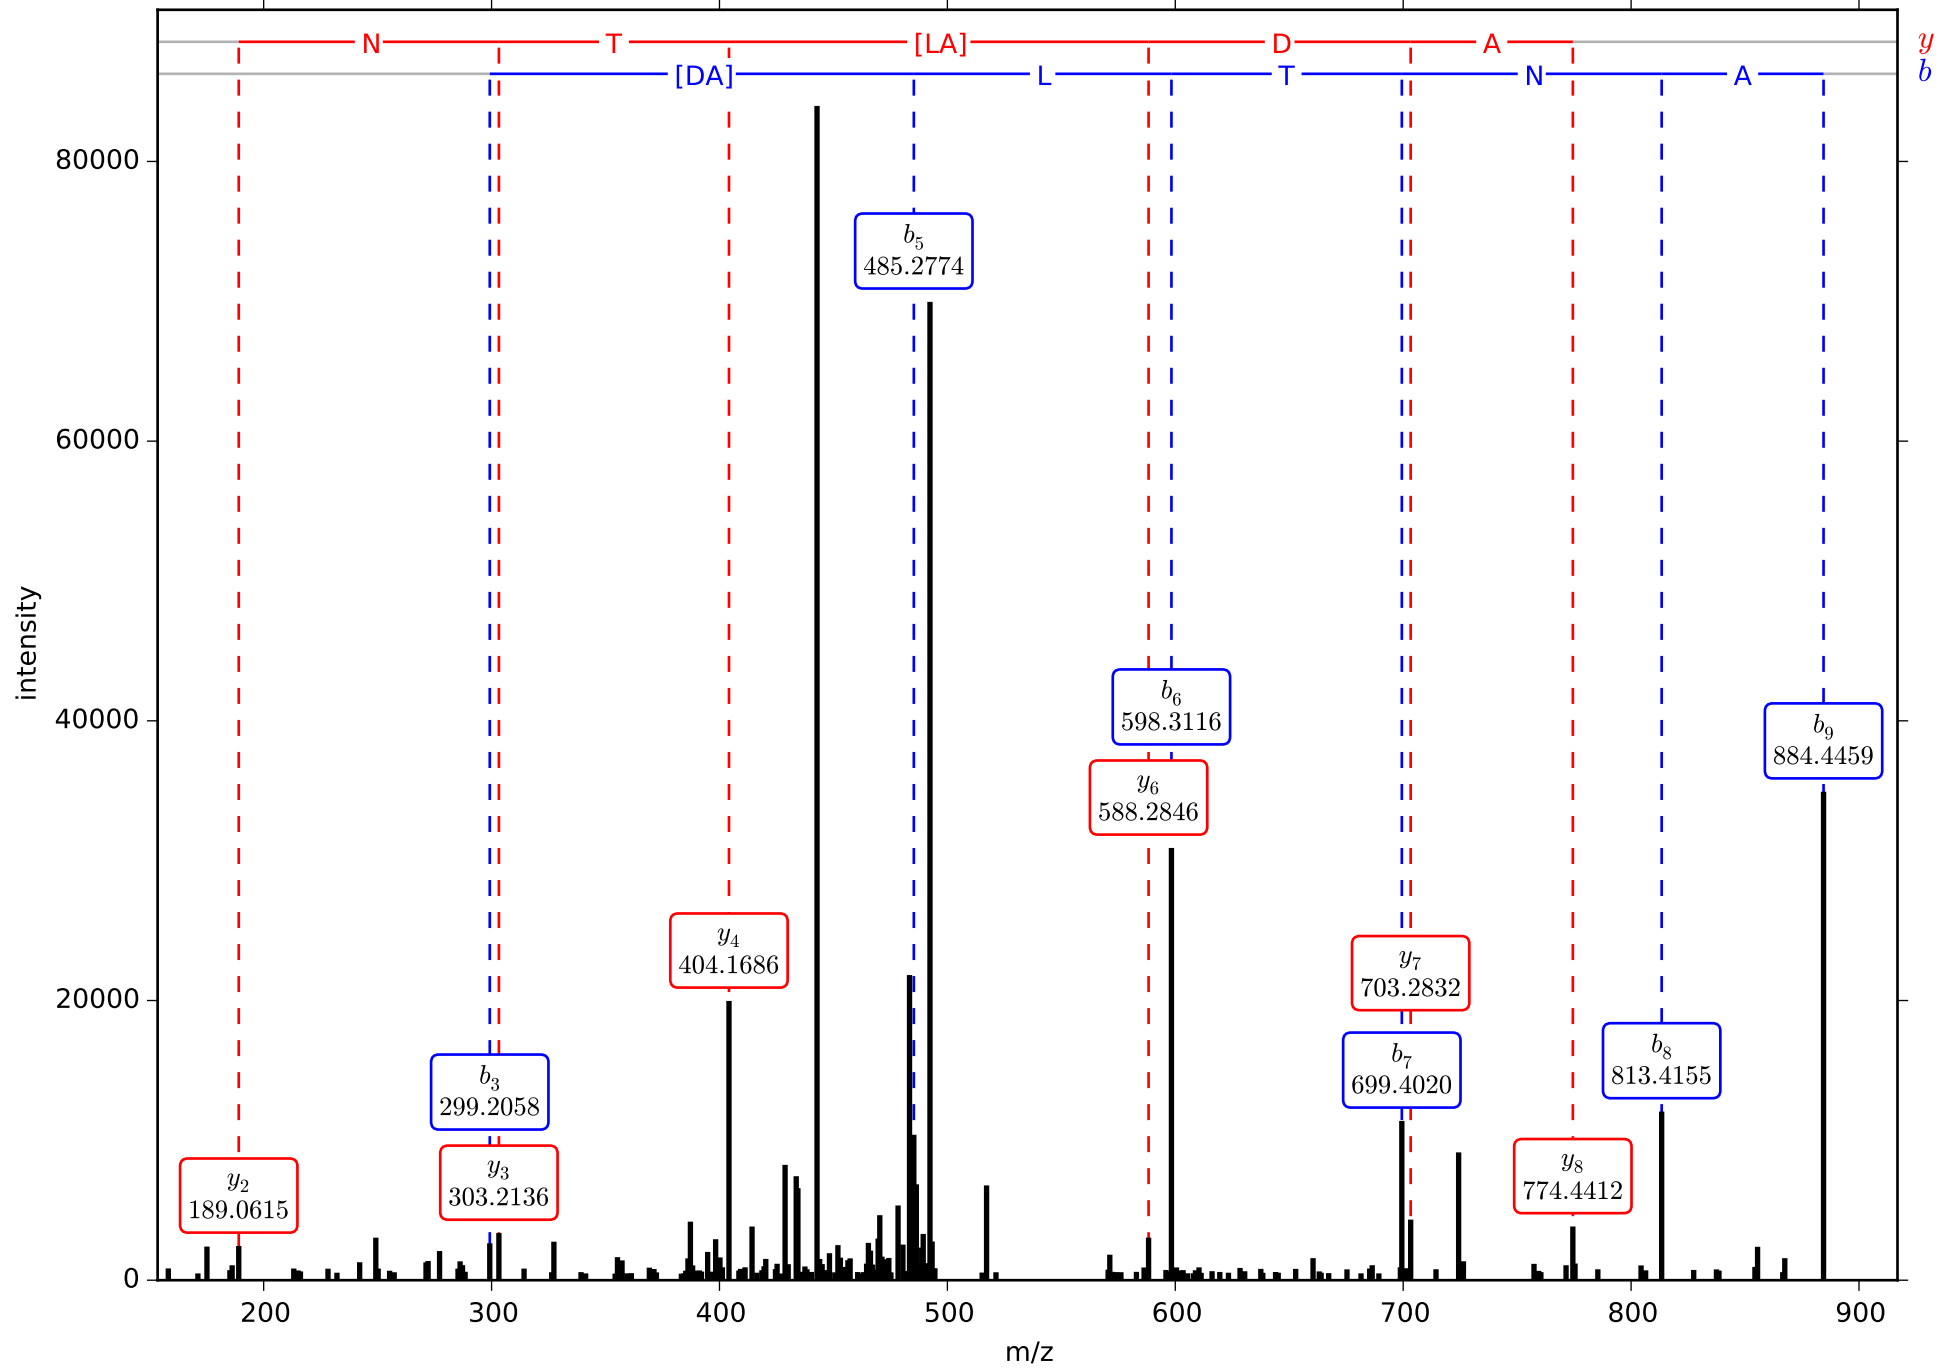

# AFLASPEYV

parent: 498.752838,2+

MSGFScore: 43

QValue: 0

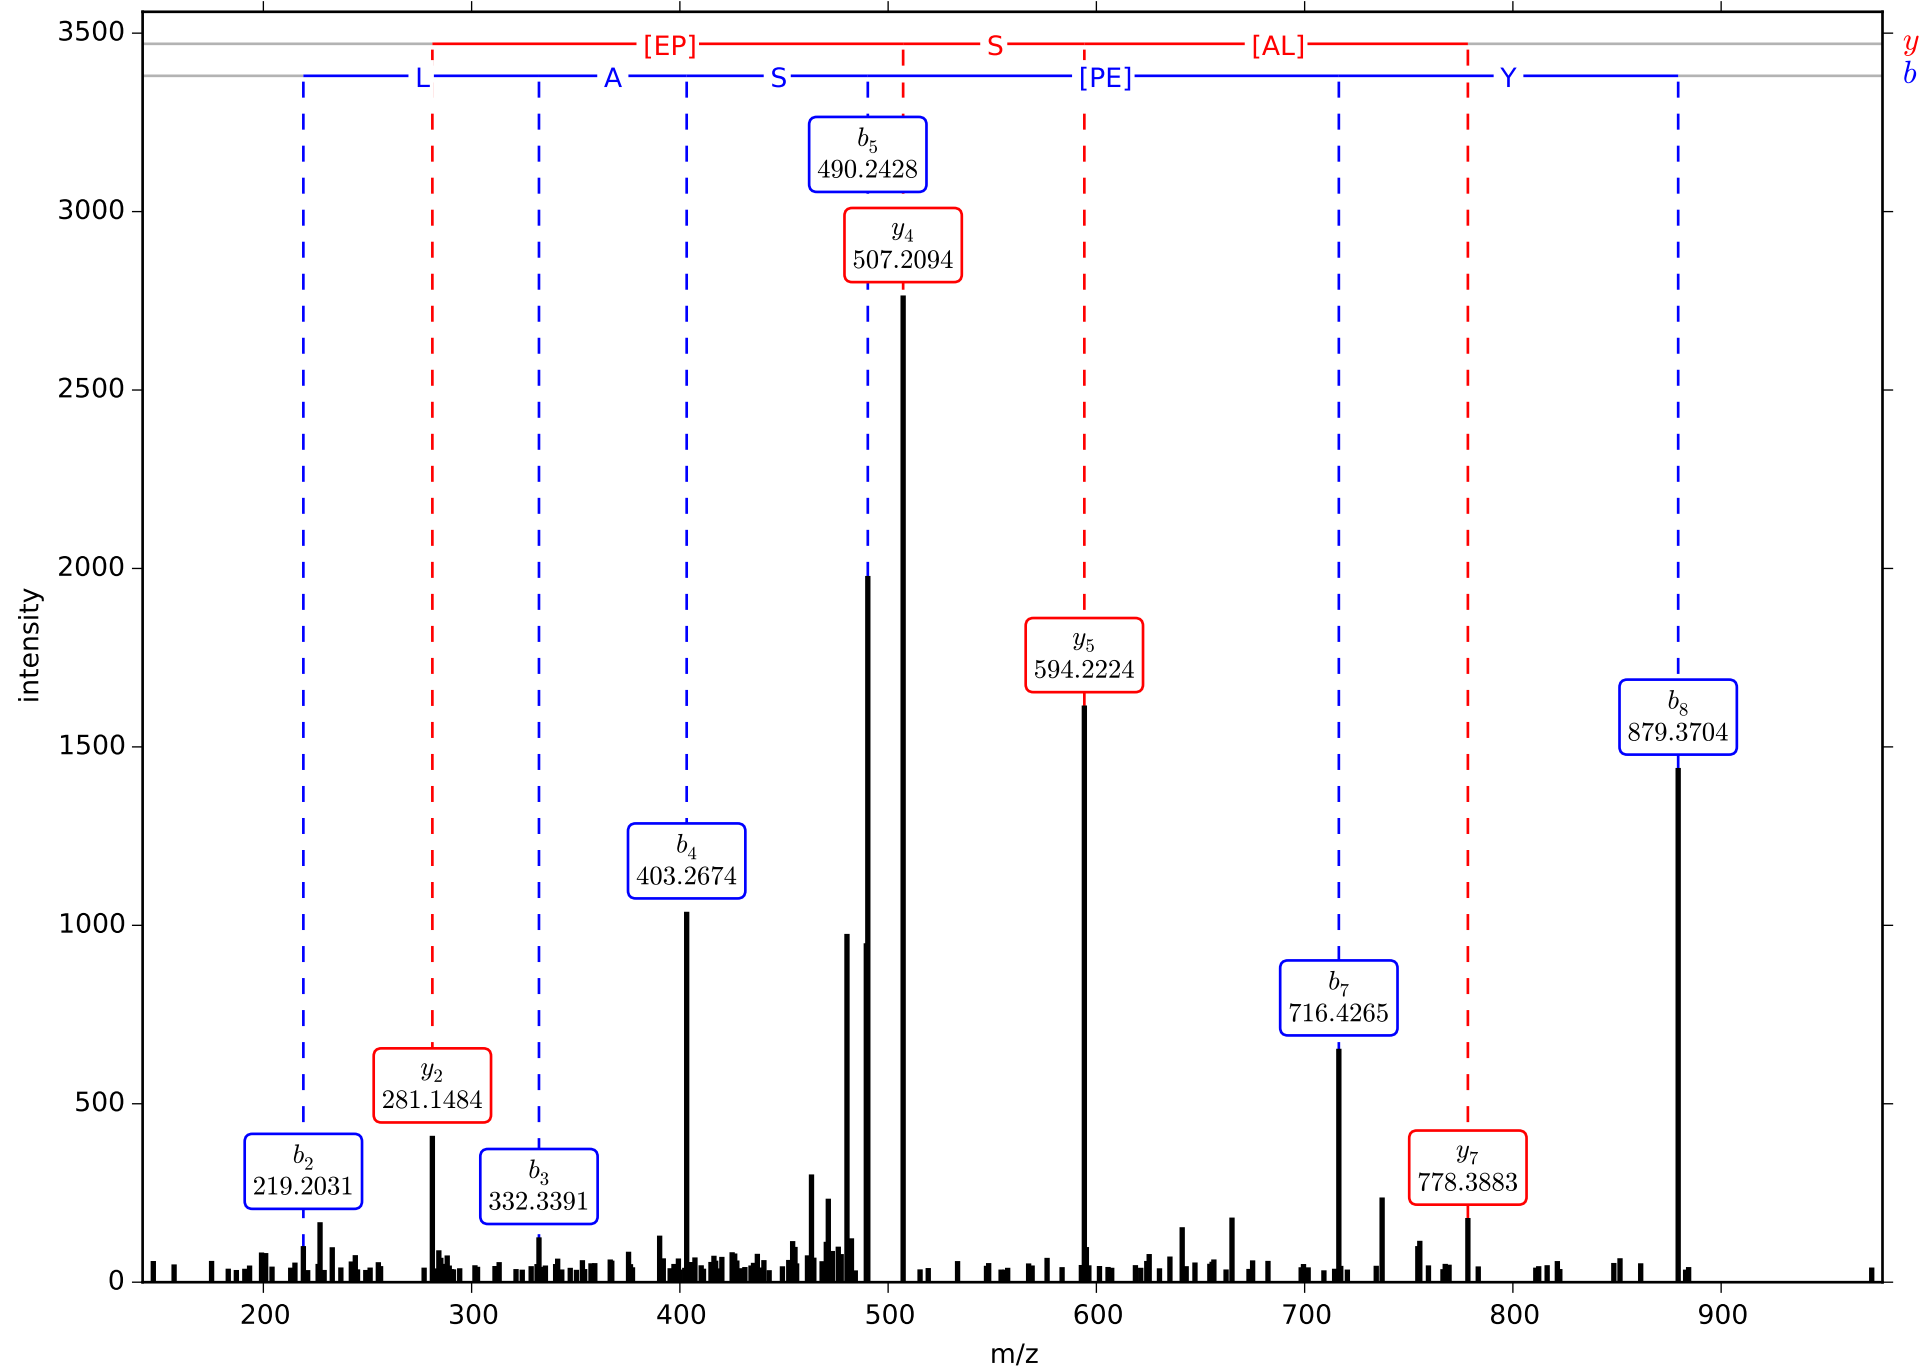

# VSHLLGINV

parent: 476.284698,2+

MSGFScore: 47

QValue: 0

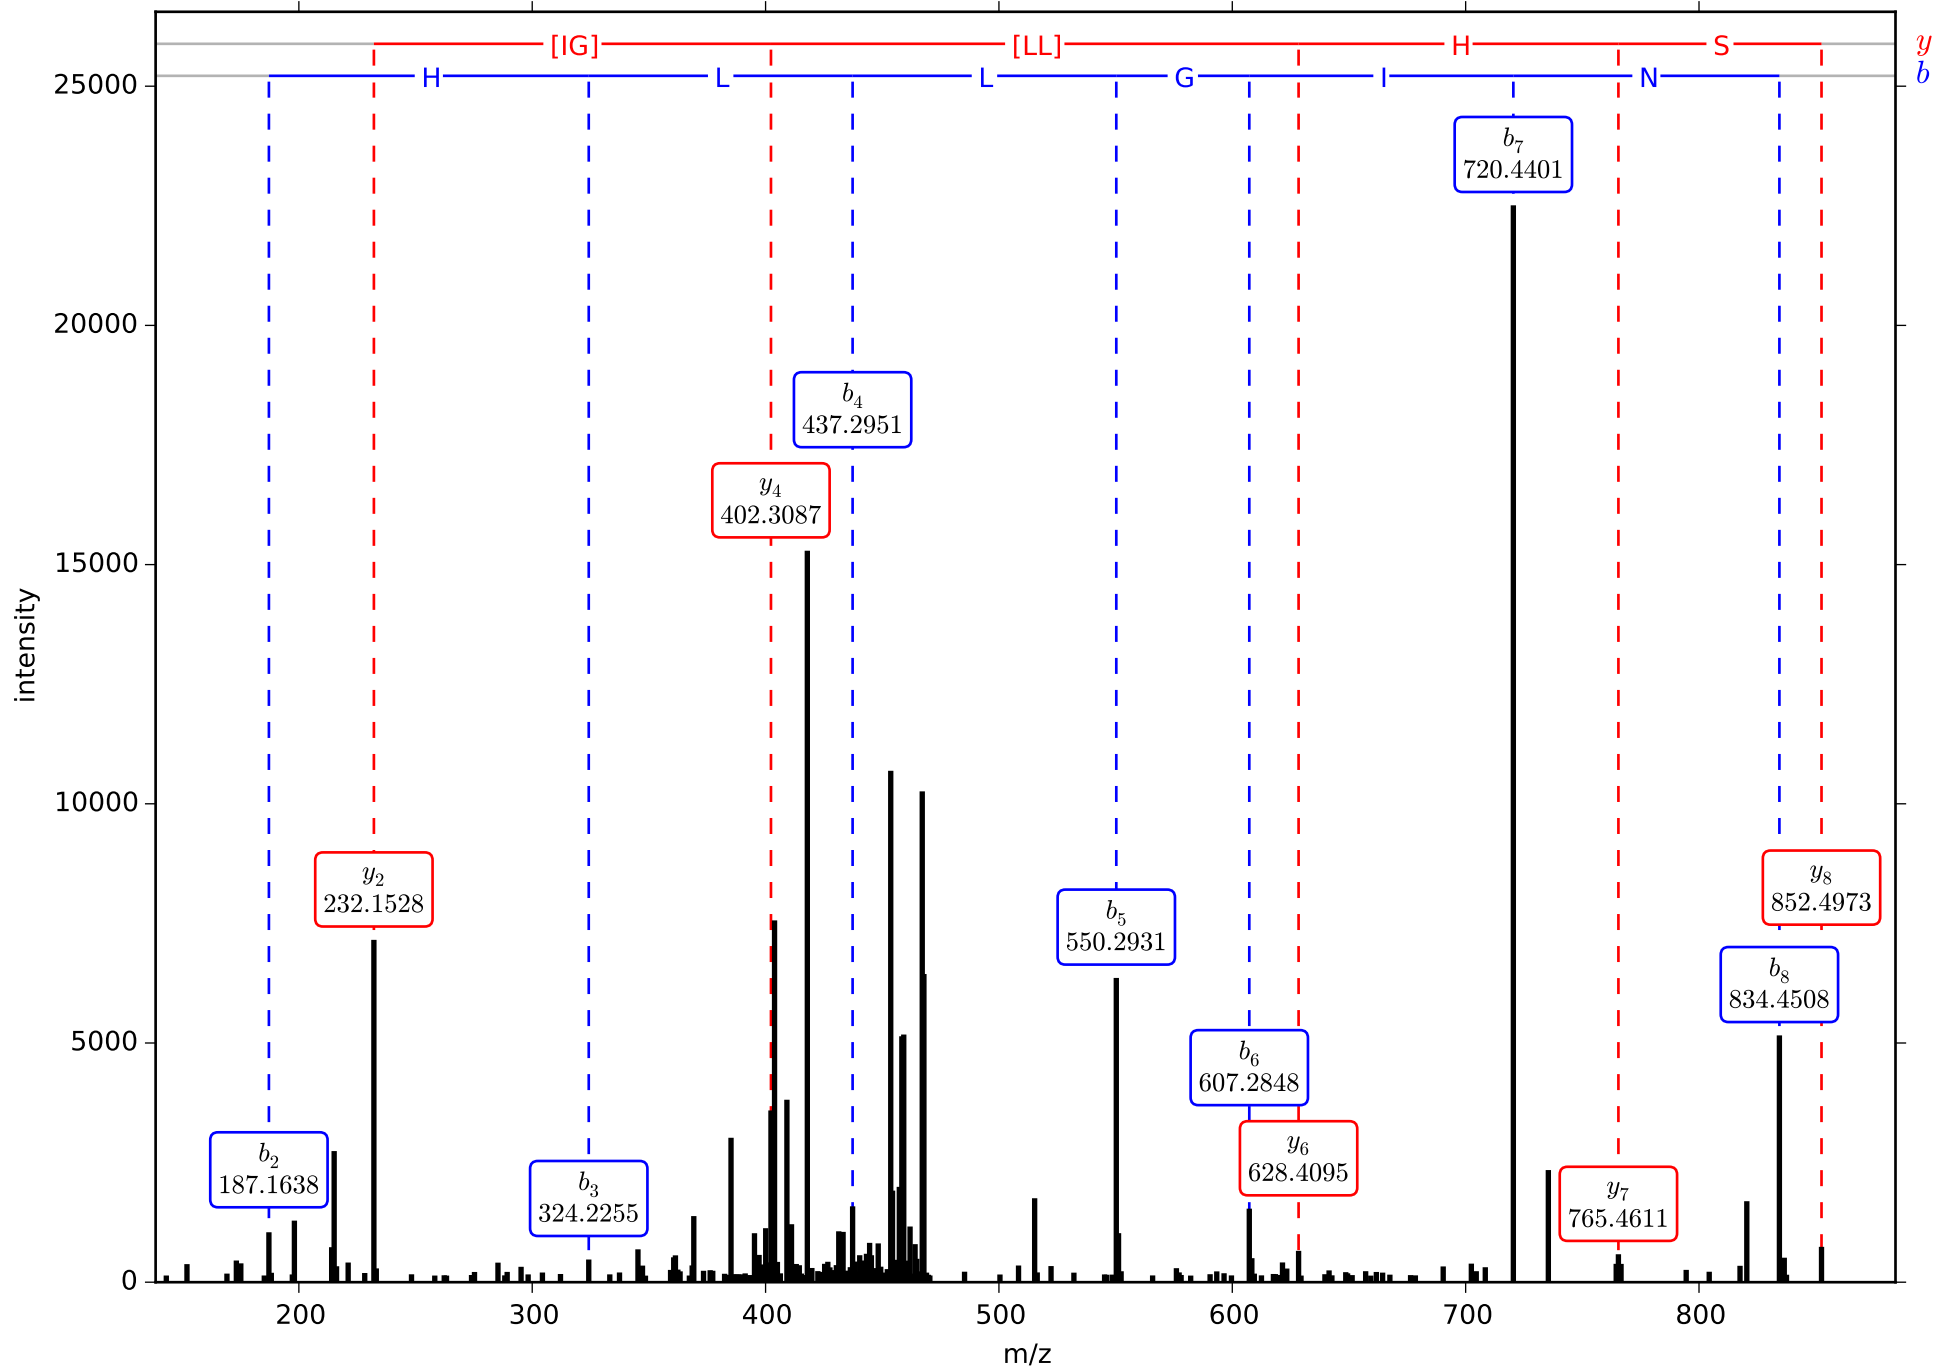

ETNLDSLPLVDT

parent: 658.833252,2+

MSGFScore: 49

QValue: 0.00386236

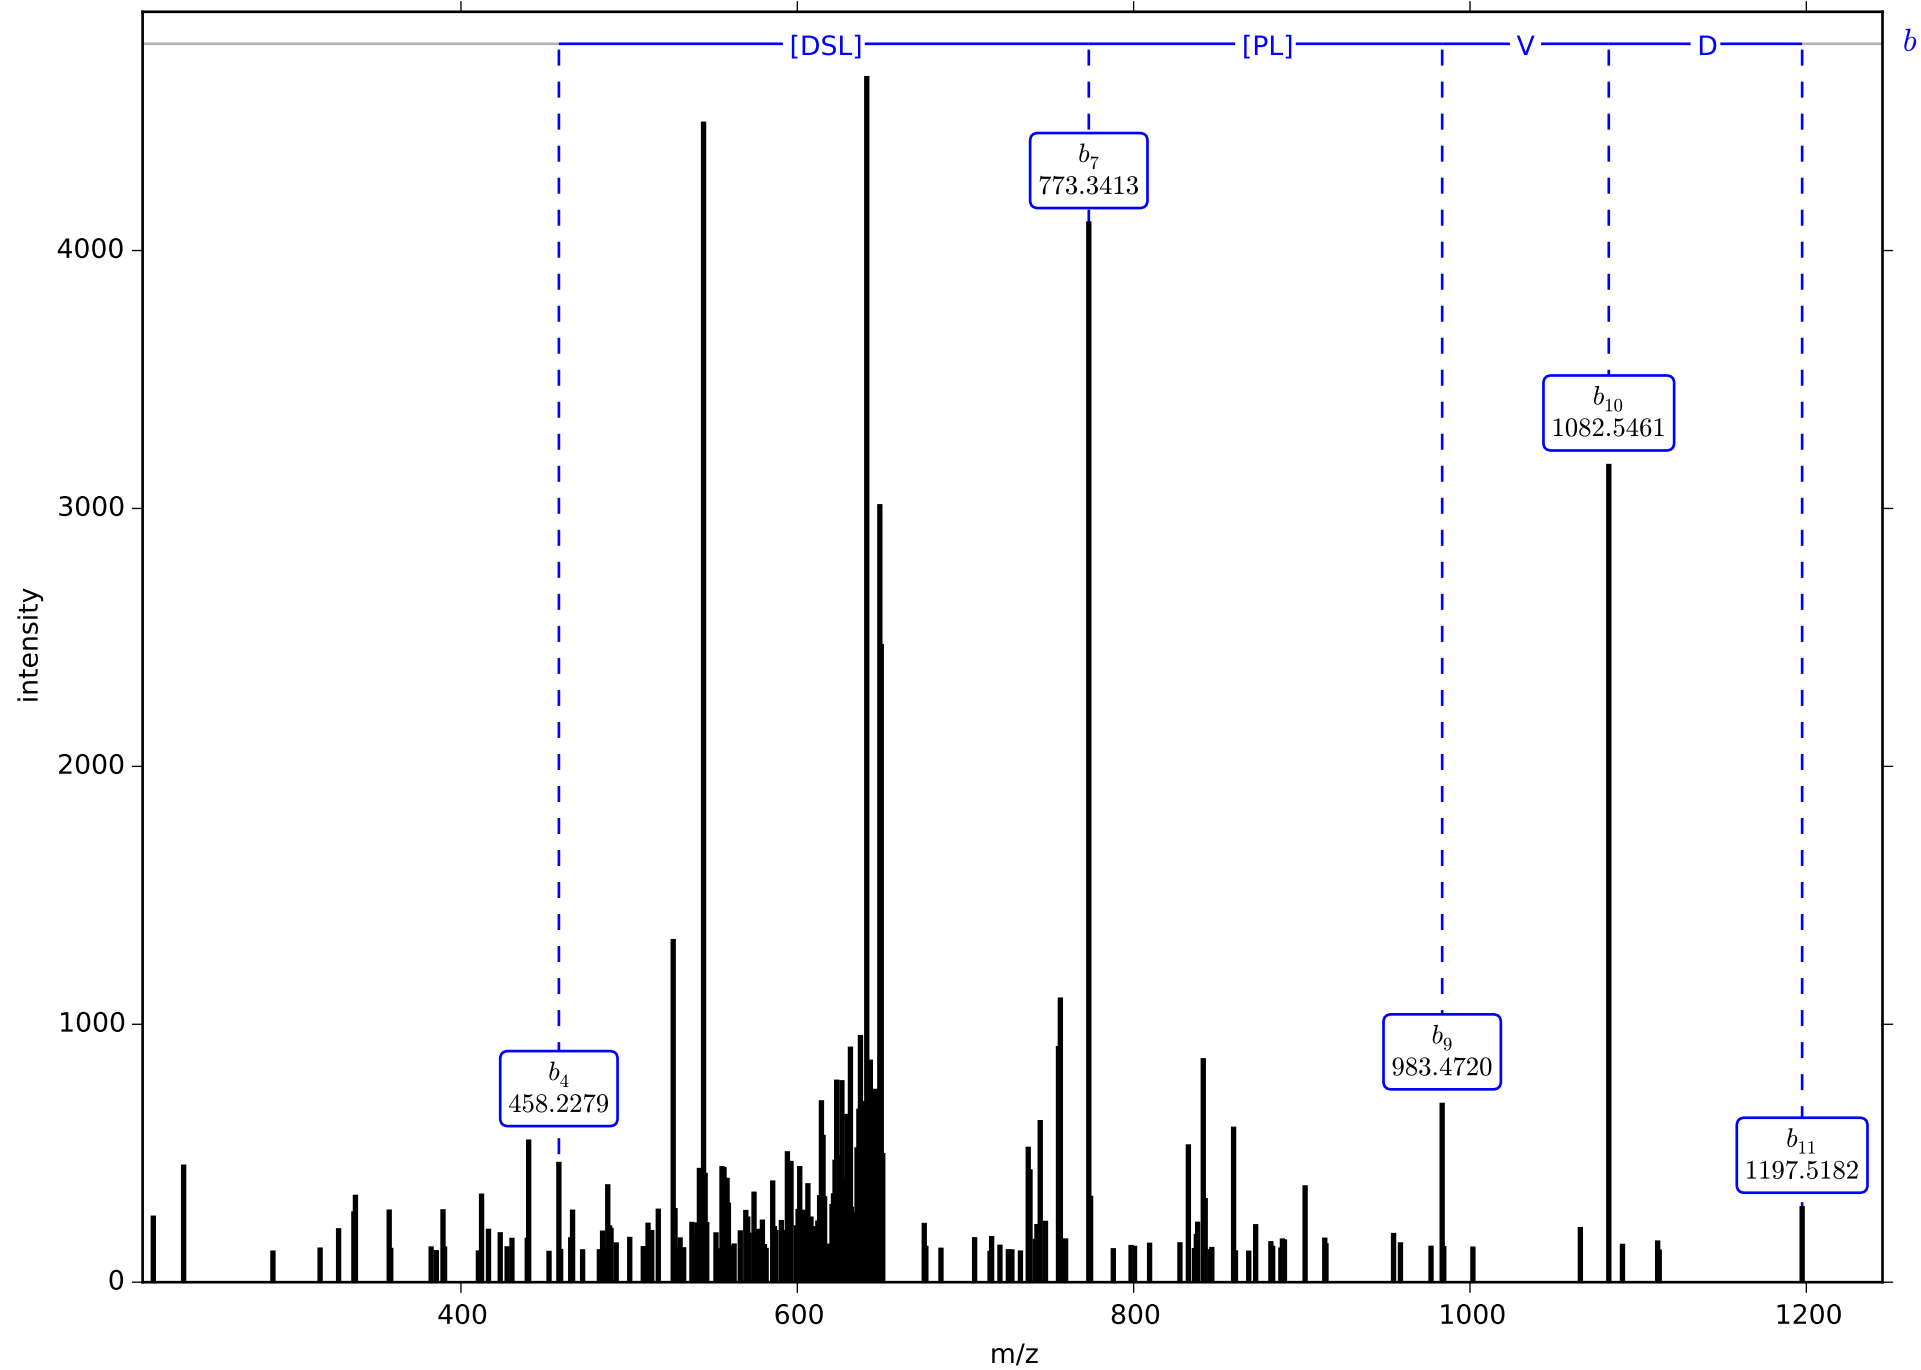

# VIITEIDPINALQAA

parent: 790.946594,2+

MSGFScore: 53

QValue: 0.00380097

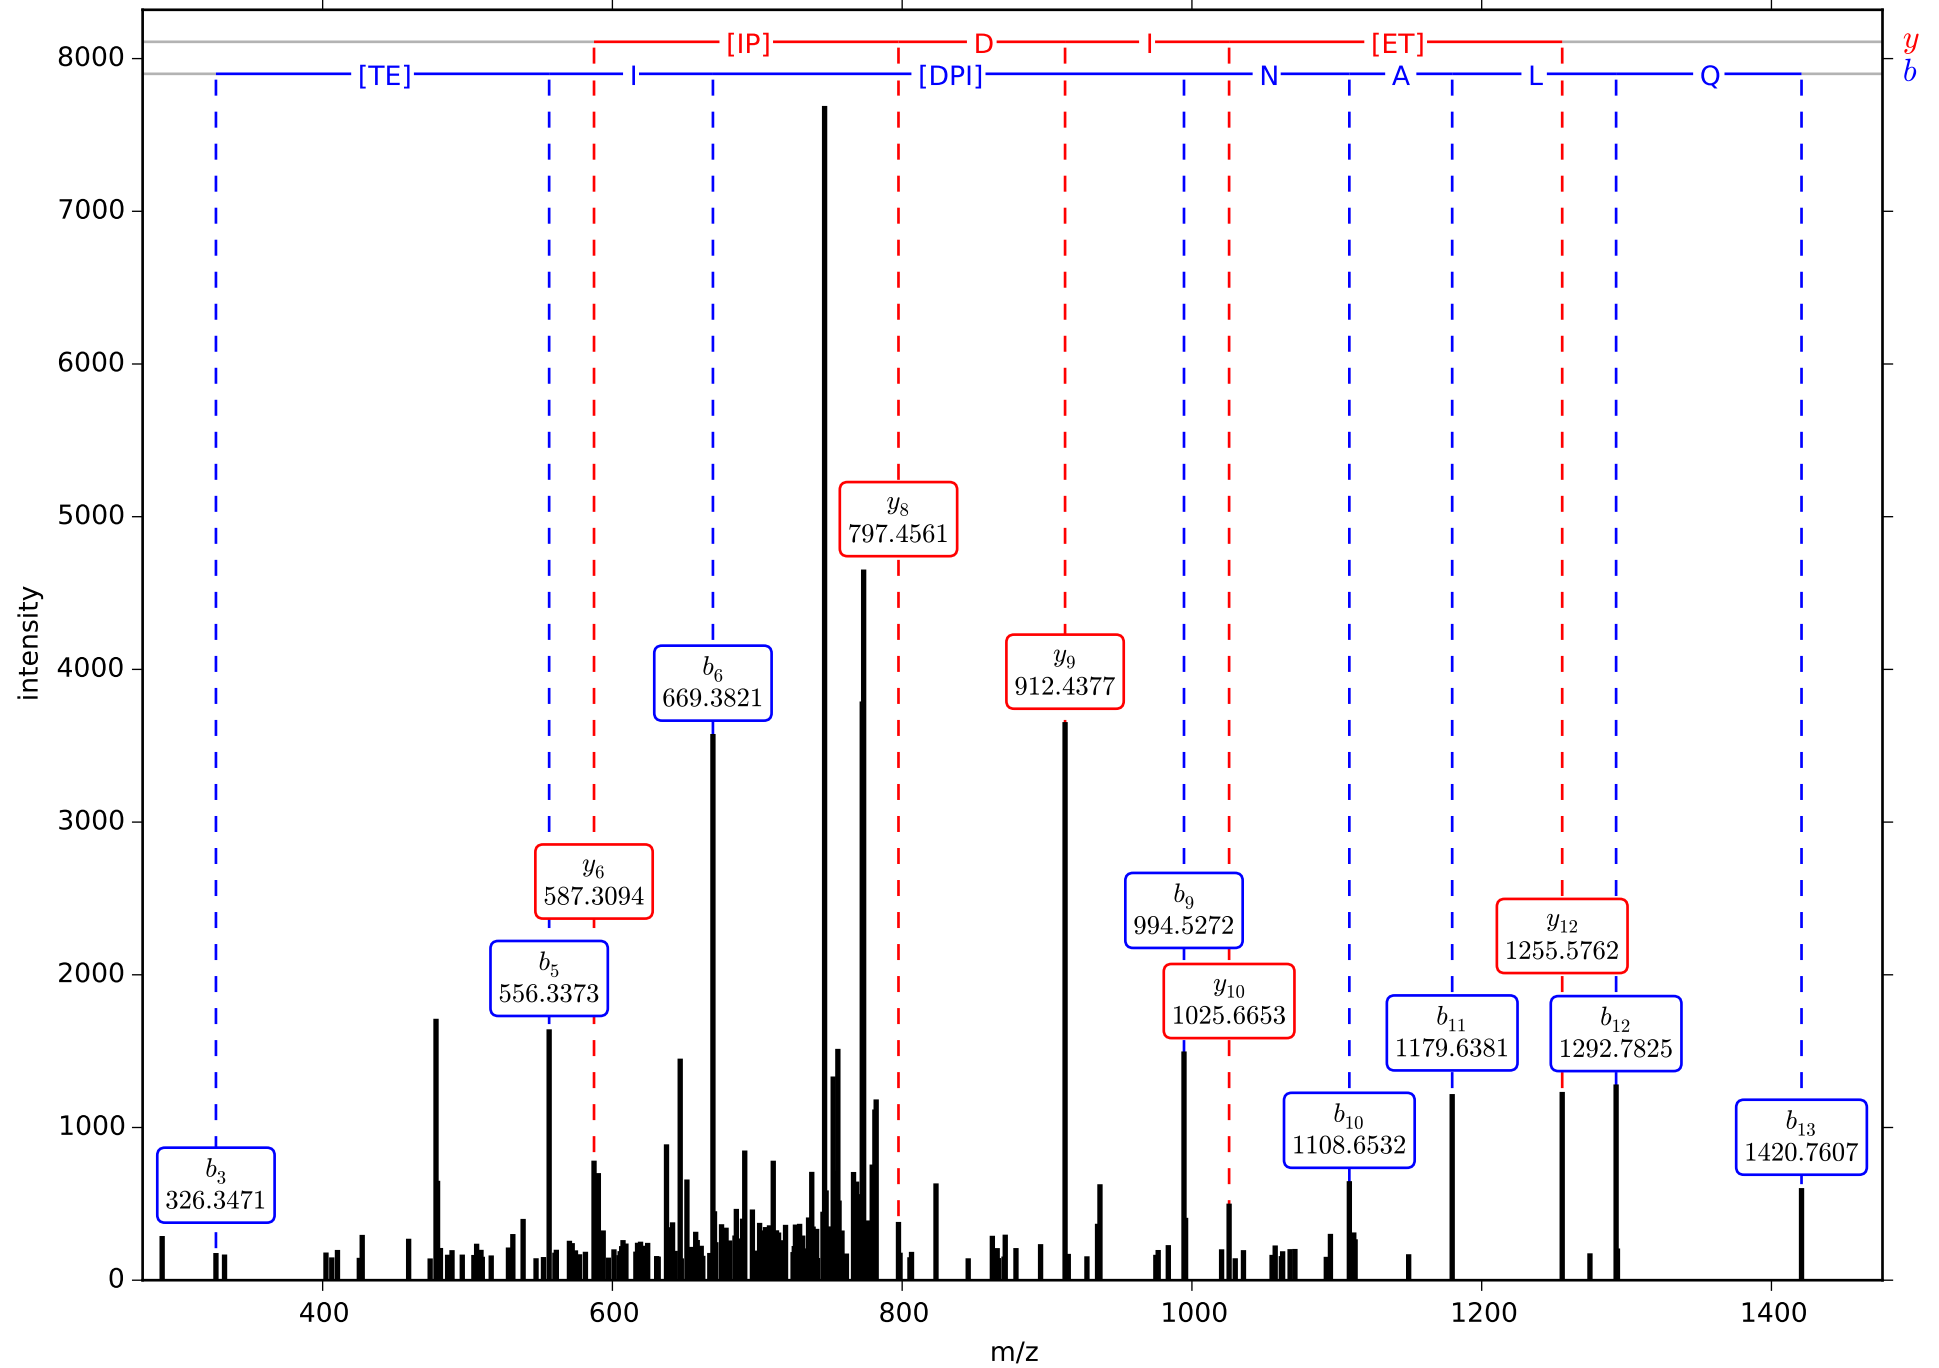

# LQAALDDEEAGGRPA

parent: 756.871125,2+

MSGFScore: 55

QValue: 0.000455581

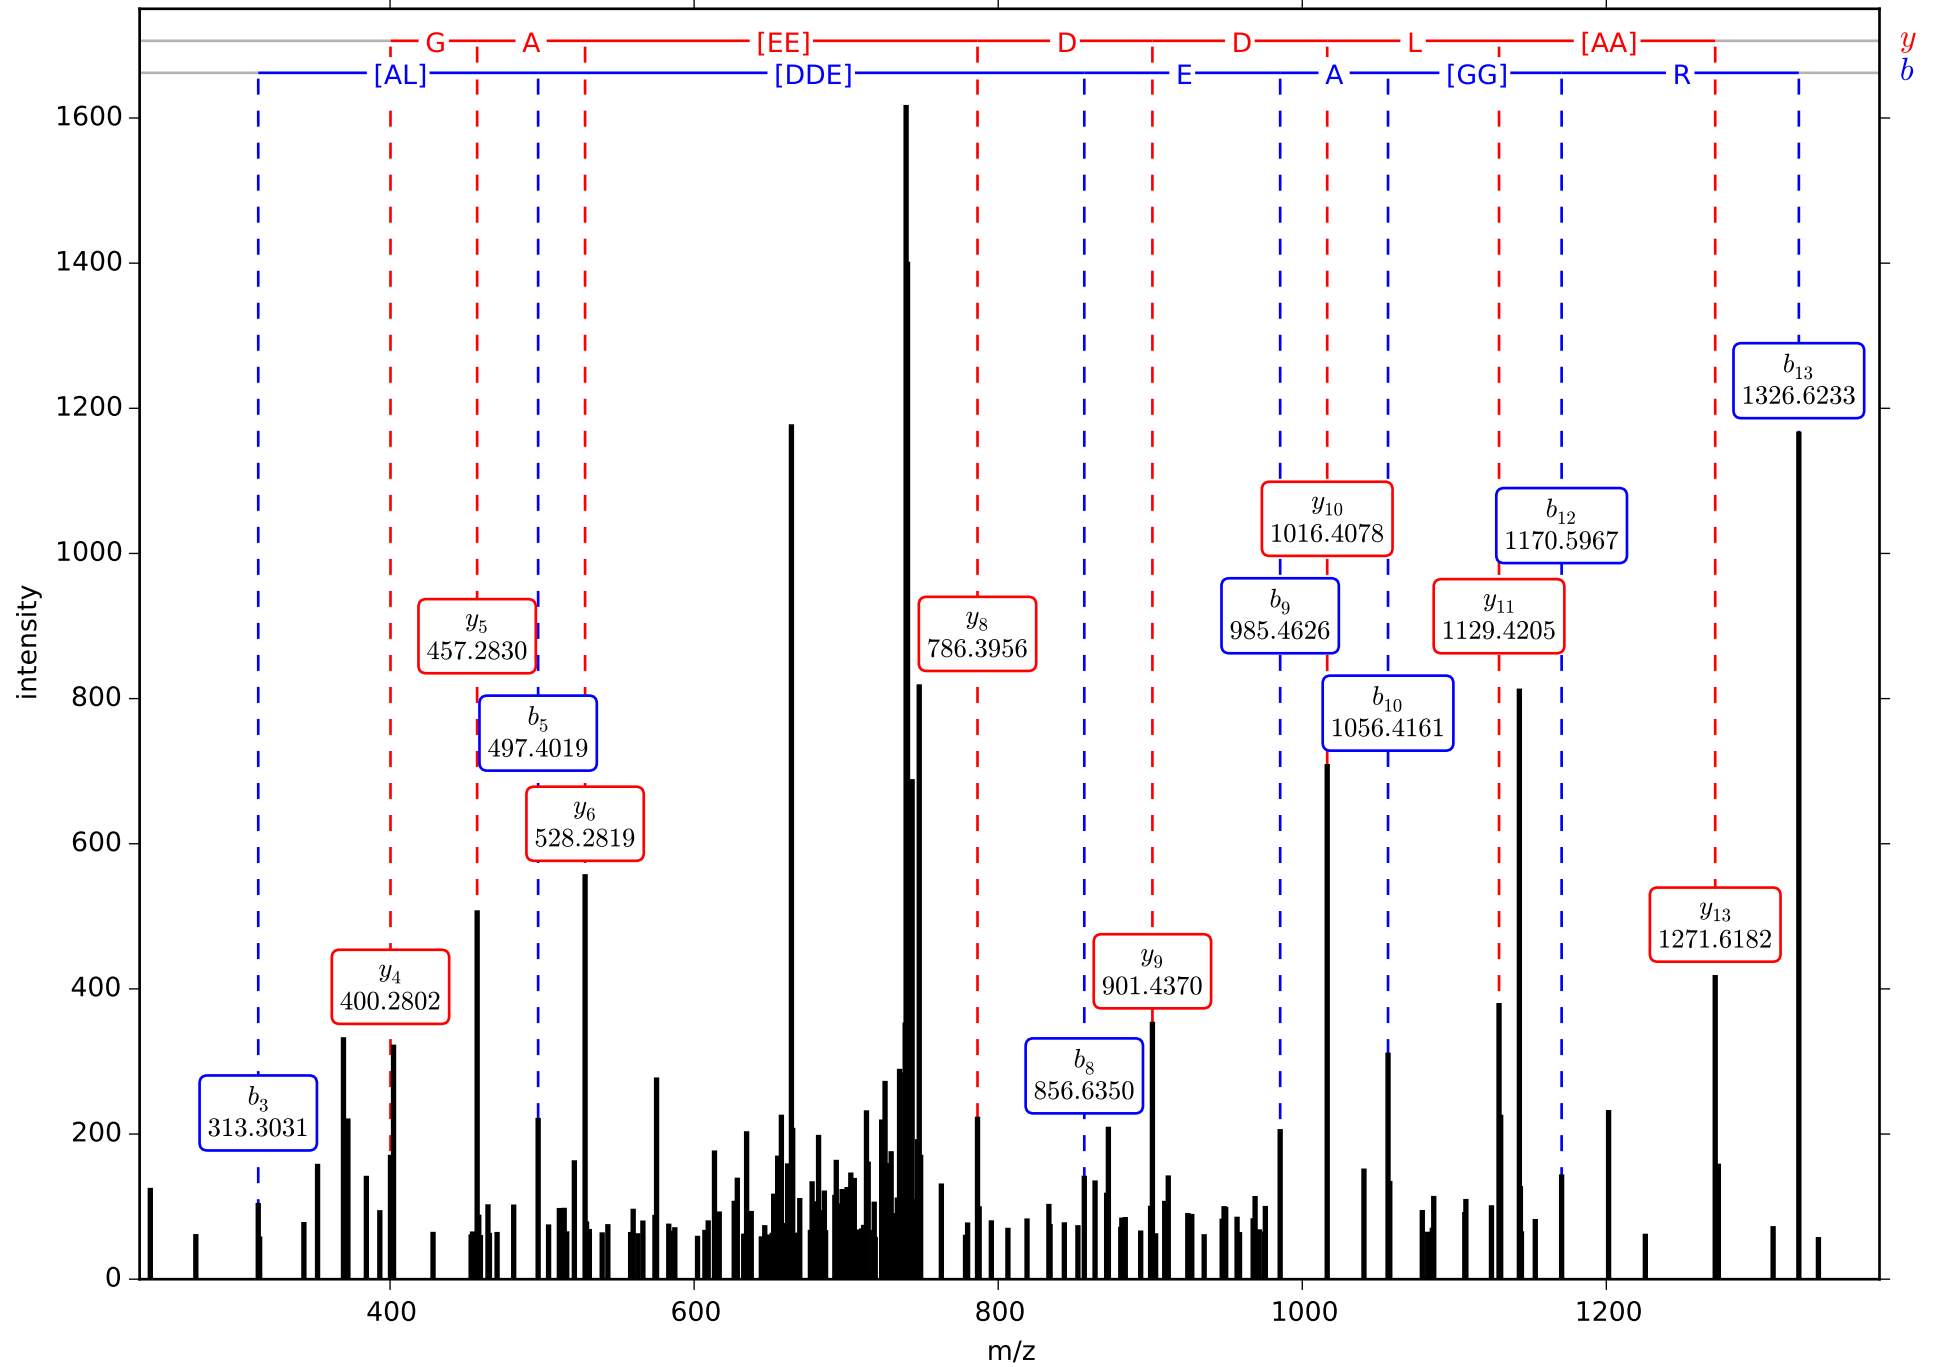



LLGGVTIAQGGVLPNIQA

parent: 861.001282,2+

MSGFScore: 59

QValue: 0.00117786

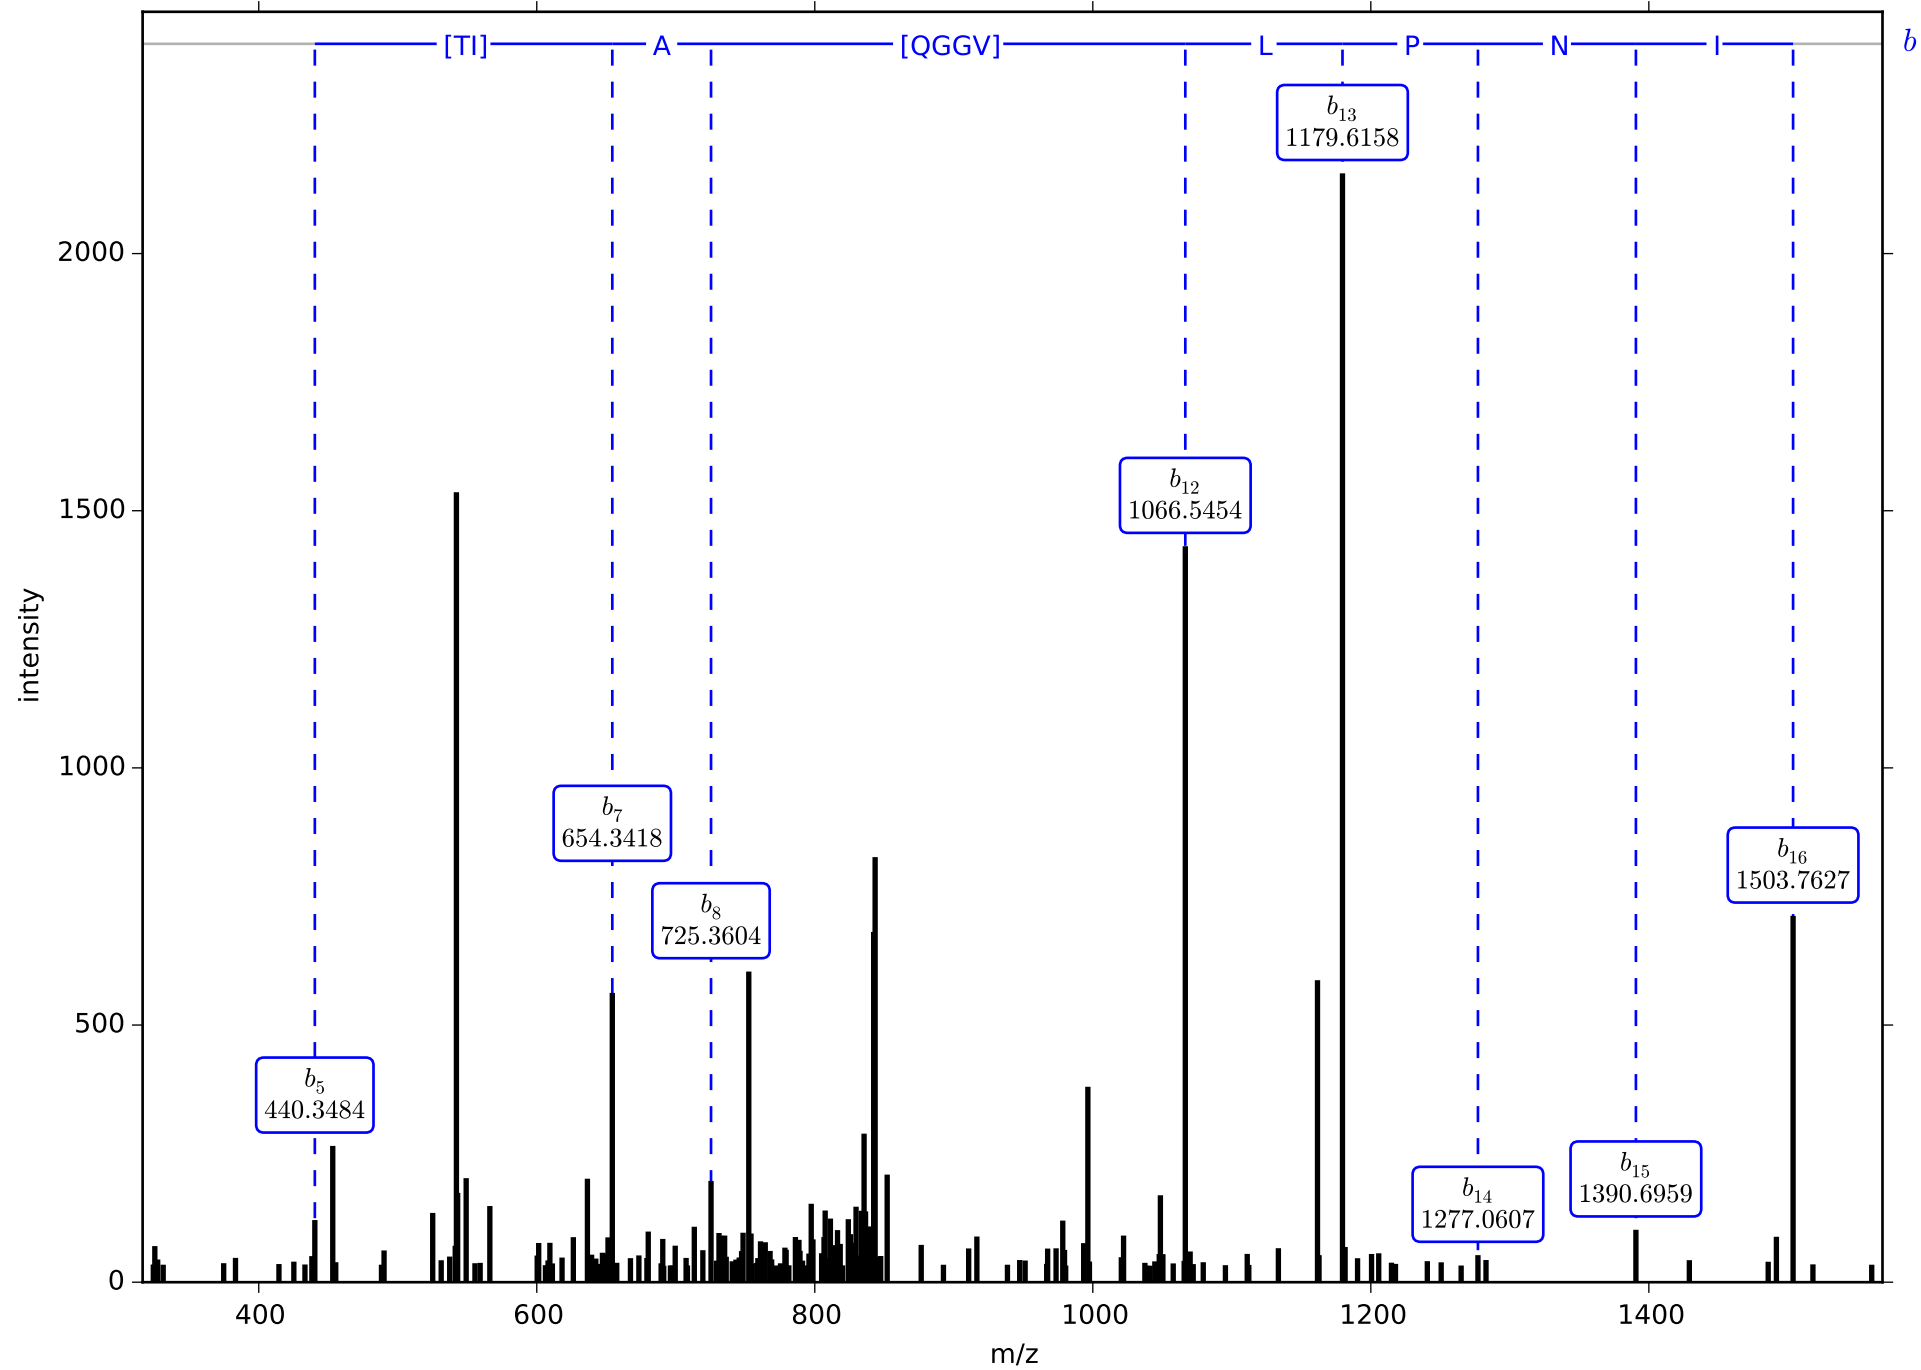

SLGSVQAPSYGARPV

parent: 744.894653,2+

MSGFScore: 61

QValue: 0

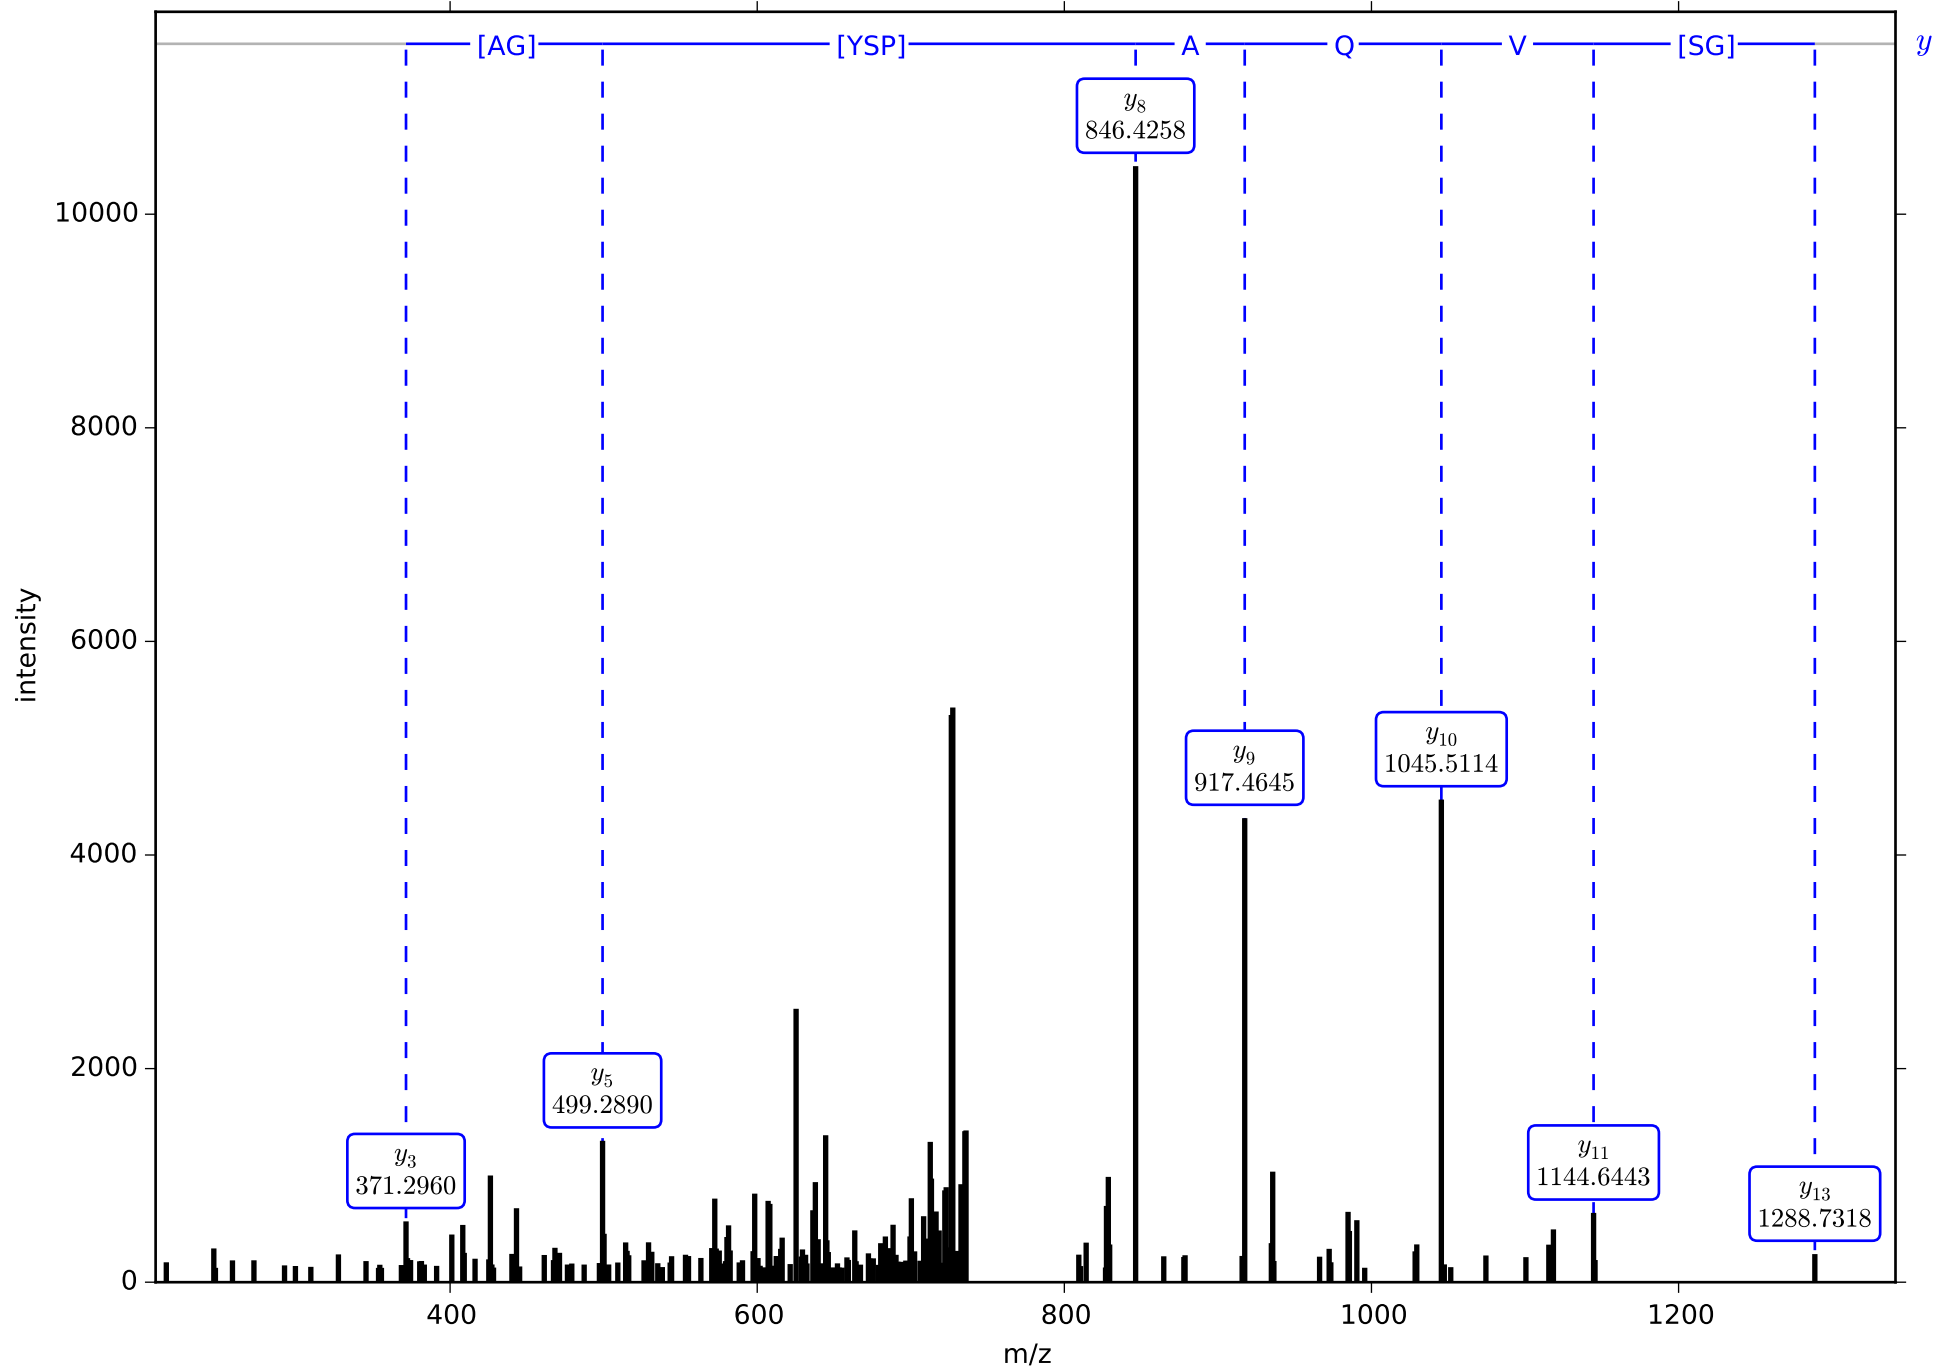

# IYISGMAPRPSLA

parent: 688.373596,2+

MSGFScore: 62

QValue: 0

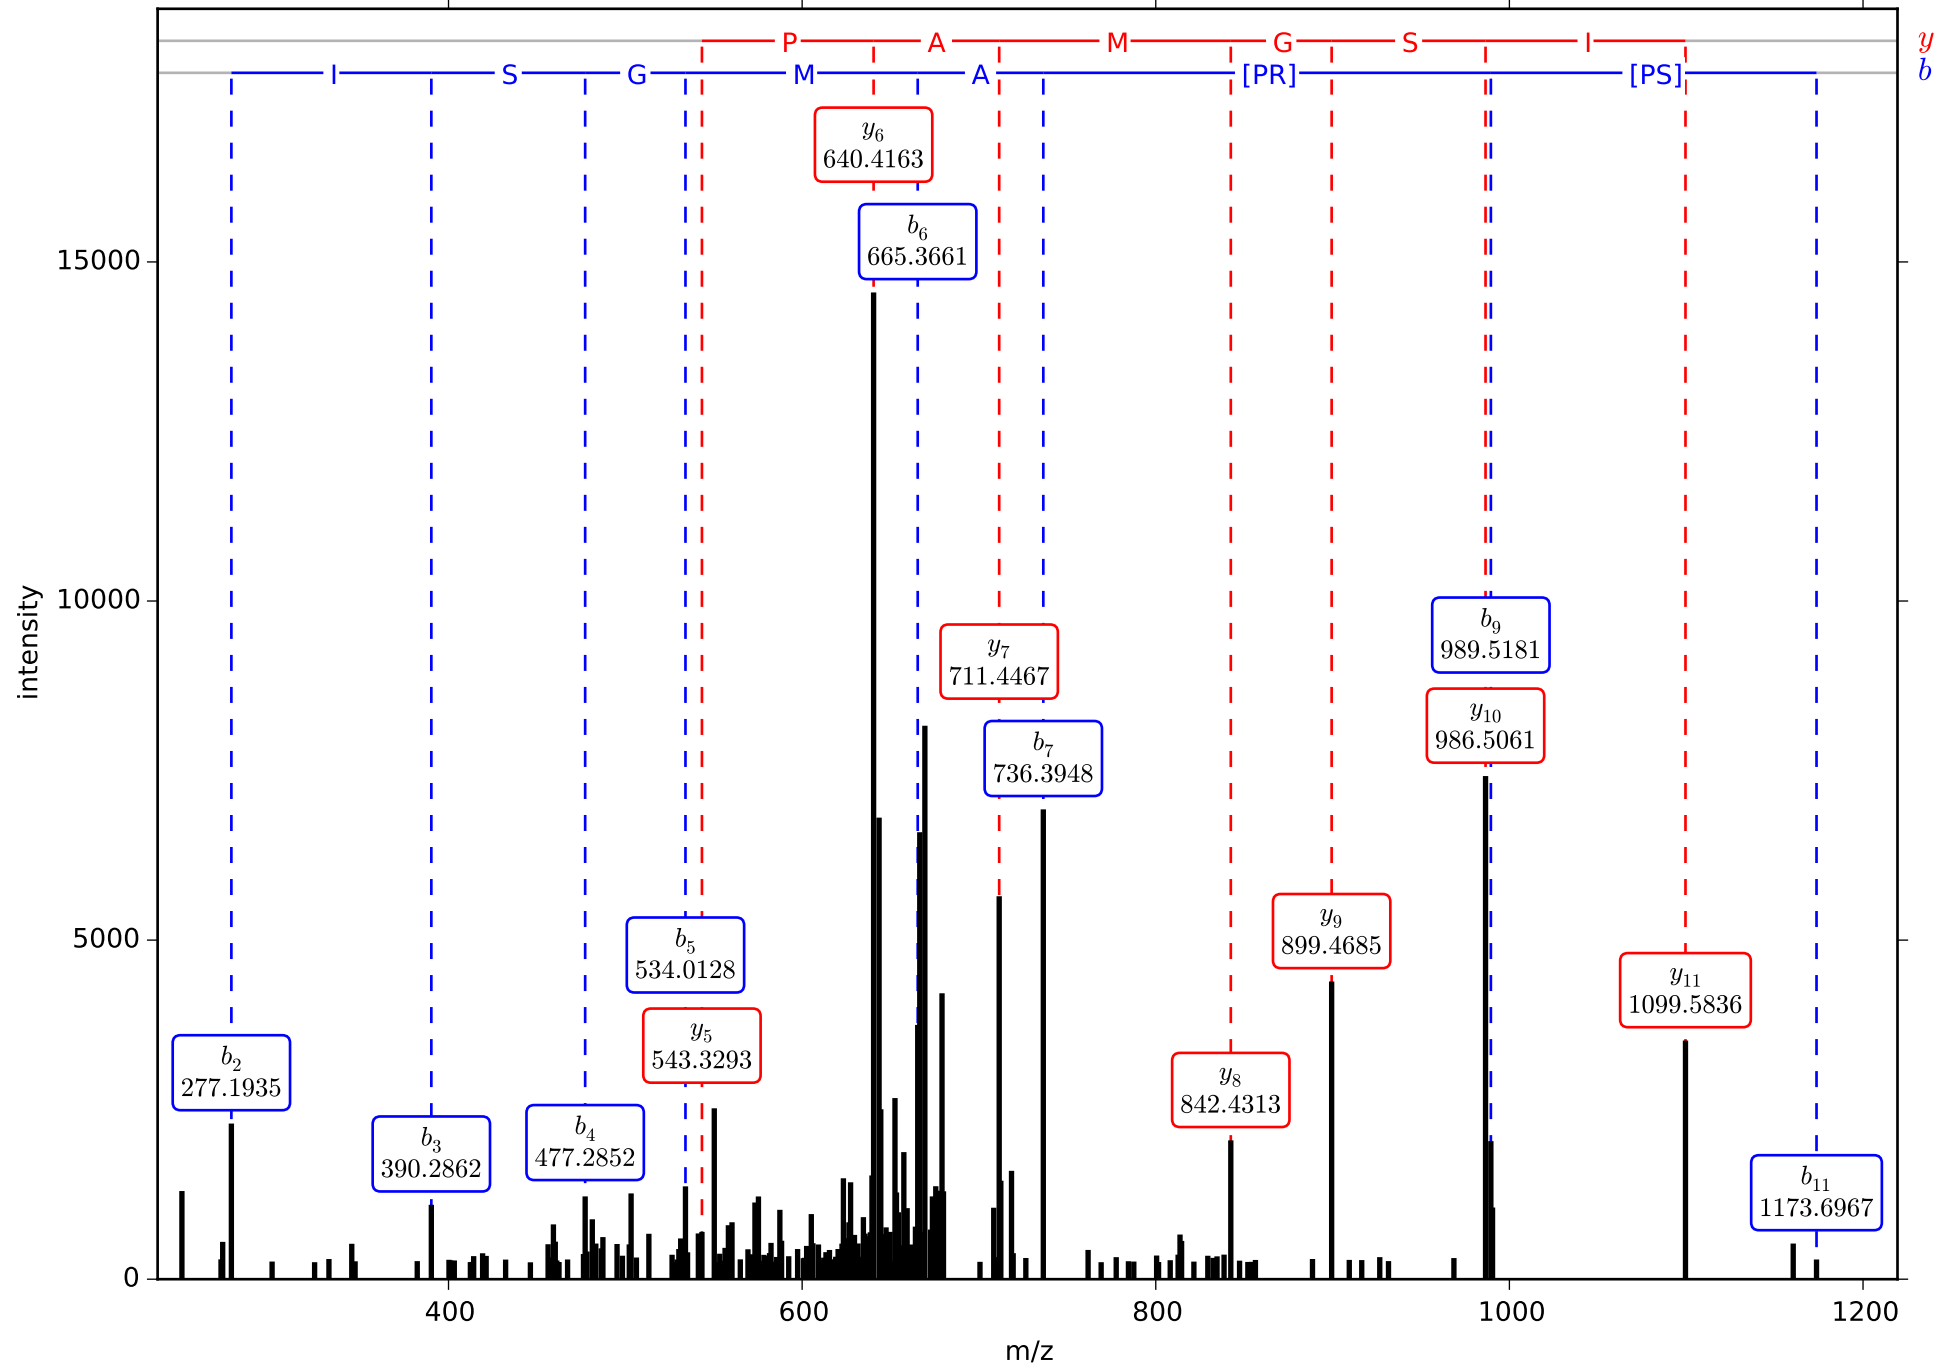

# VFLENVIRDAVT

parent: 688.389587,2+

MSGFScore: 64

QValue: 0

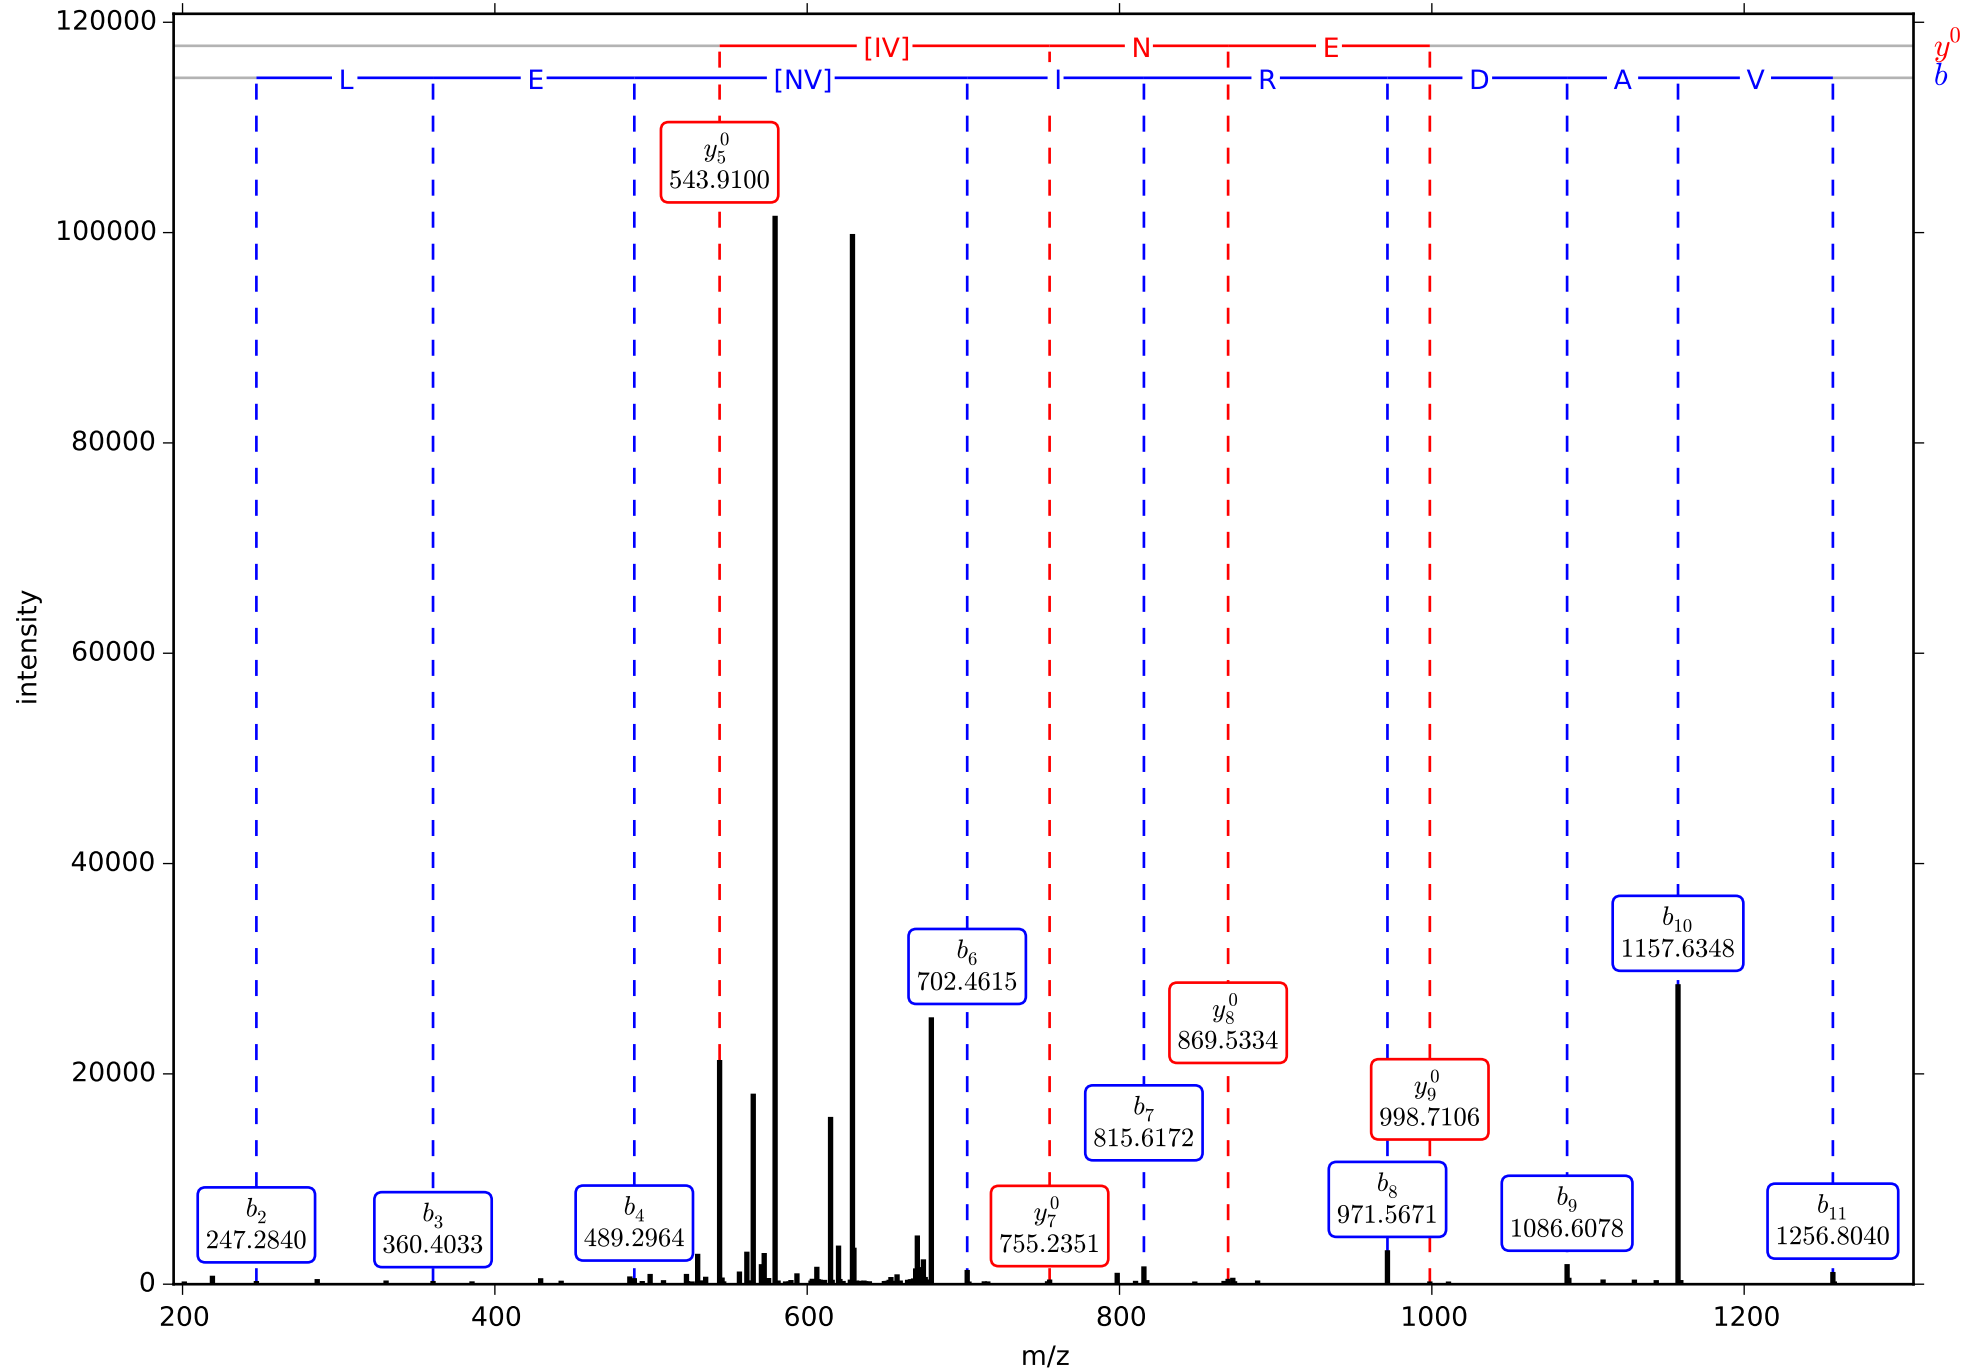

YTPSGQAGAAASESLFV

parent: 828.398499,2+

MSGFScore: 66

QValue: 0

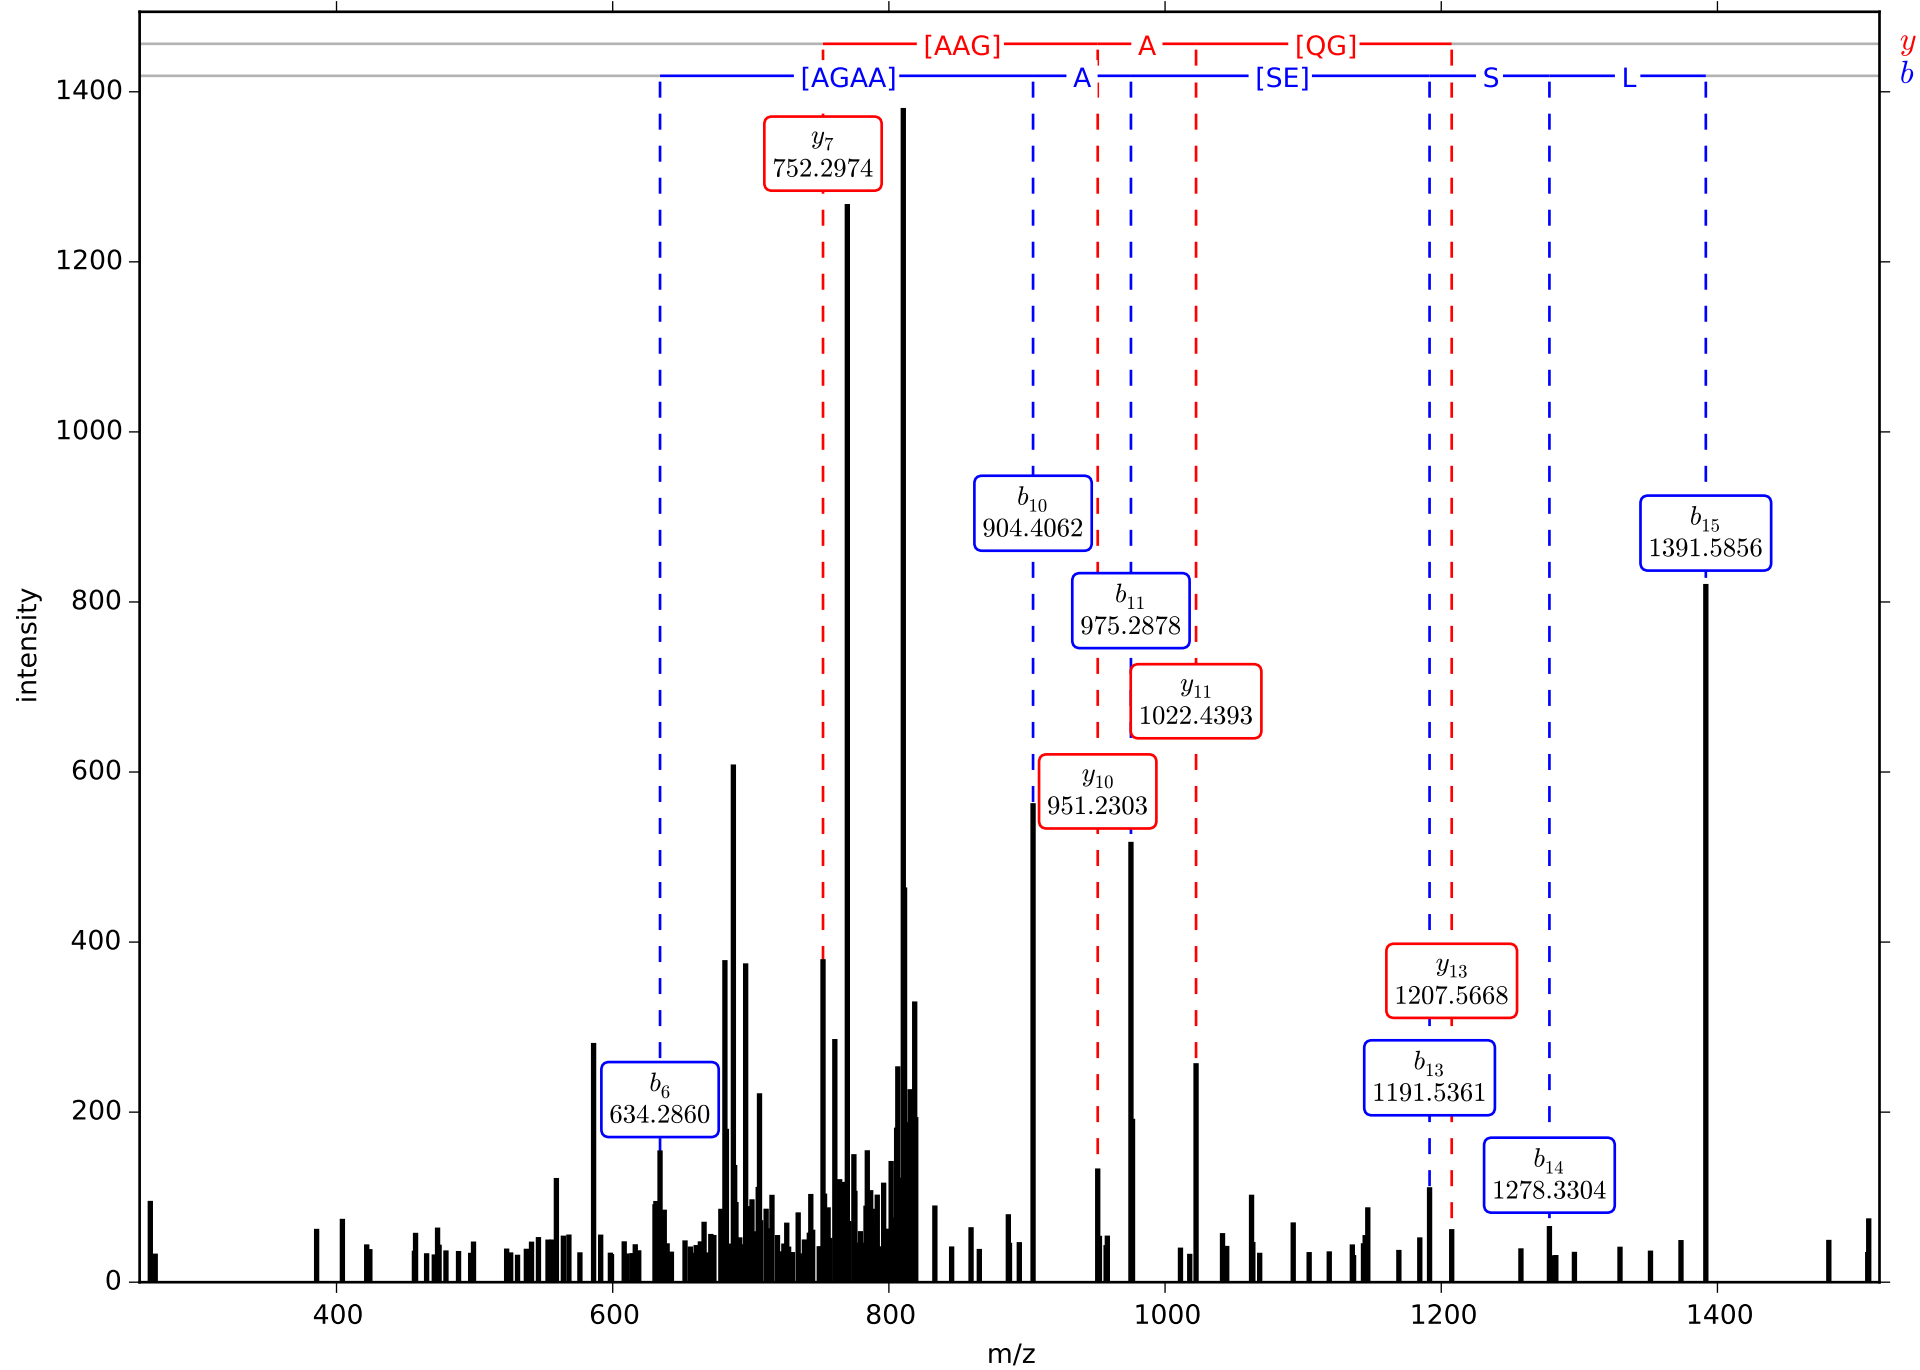

DMIILPEMVGSMVGV

parent: 795.906738,2+

MSGFScore: 72

QValue: 0.00123203

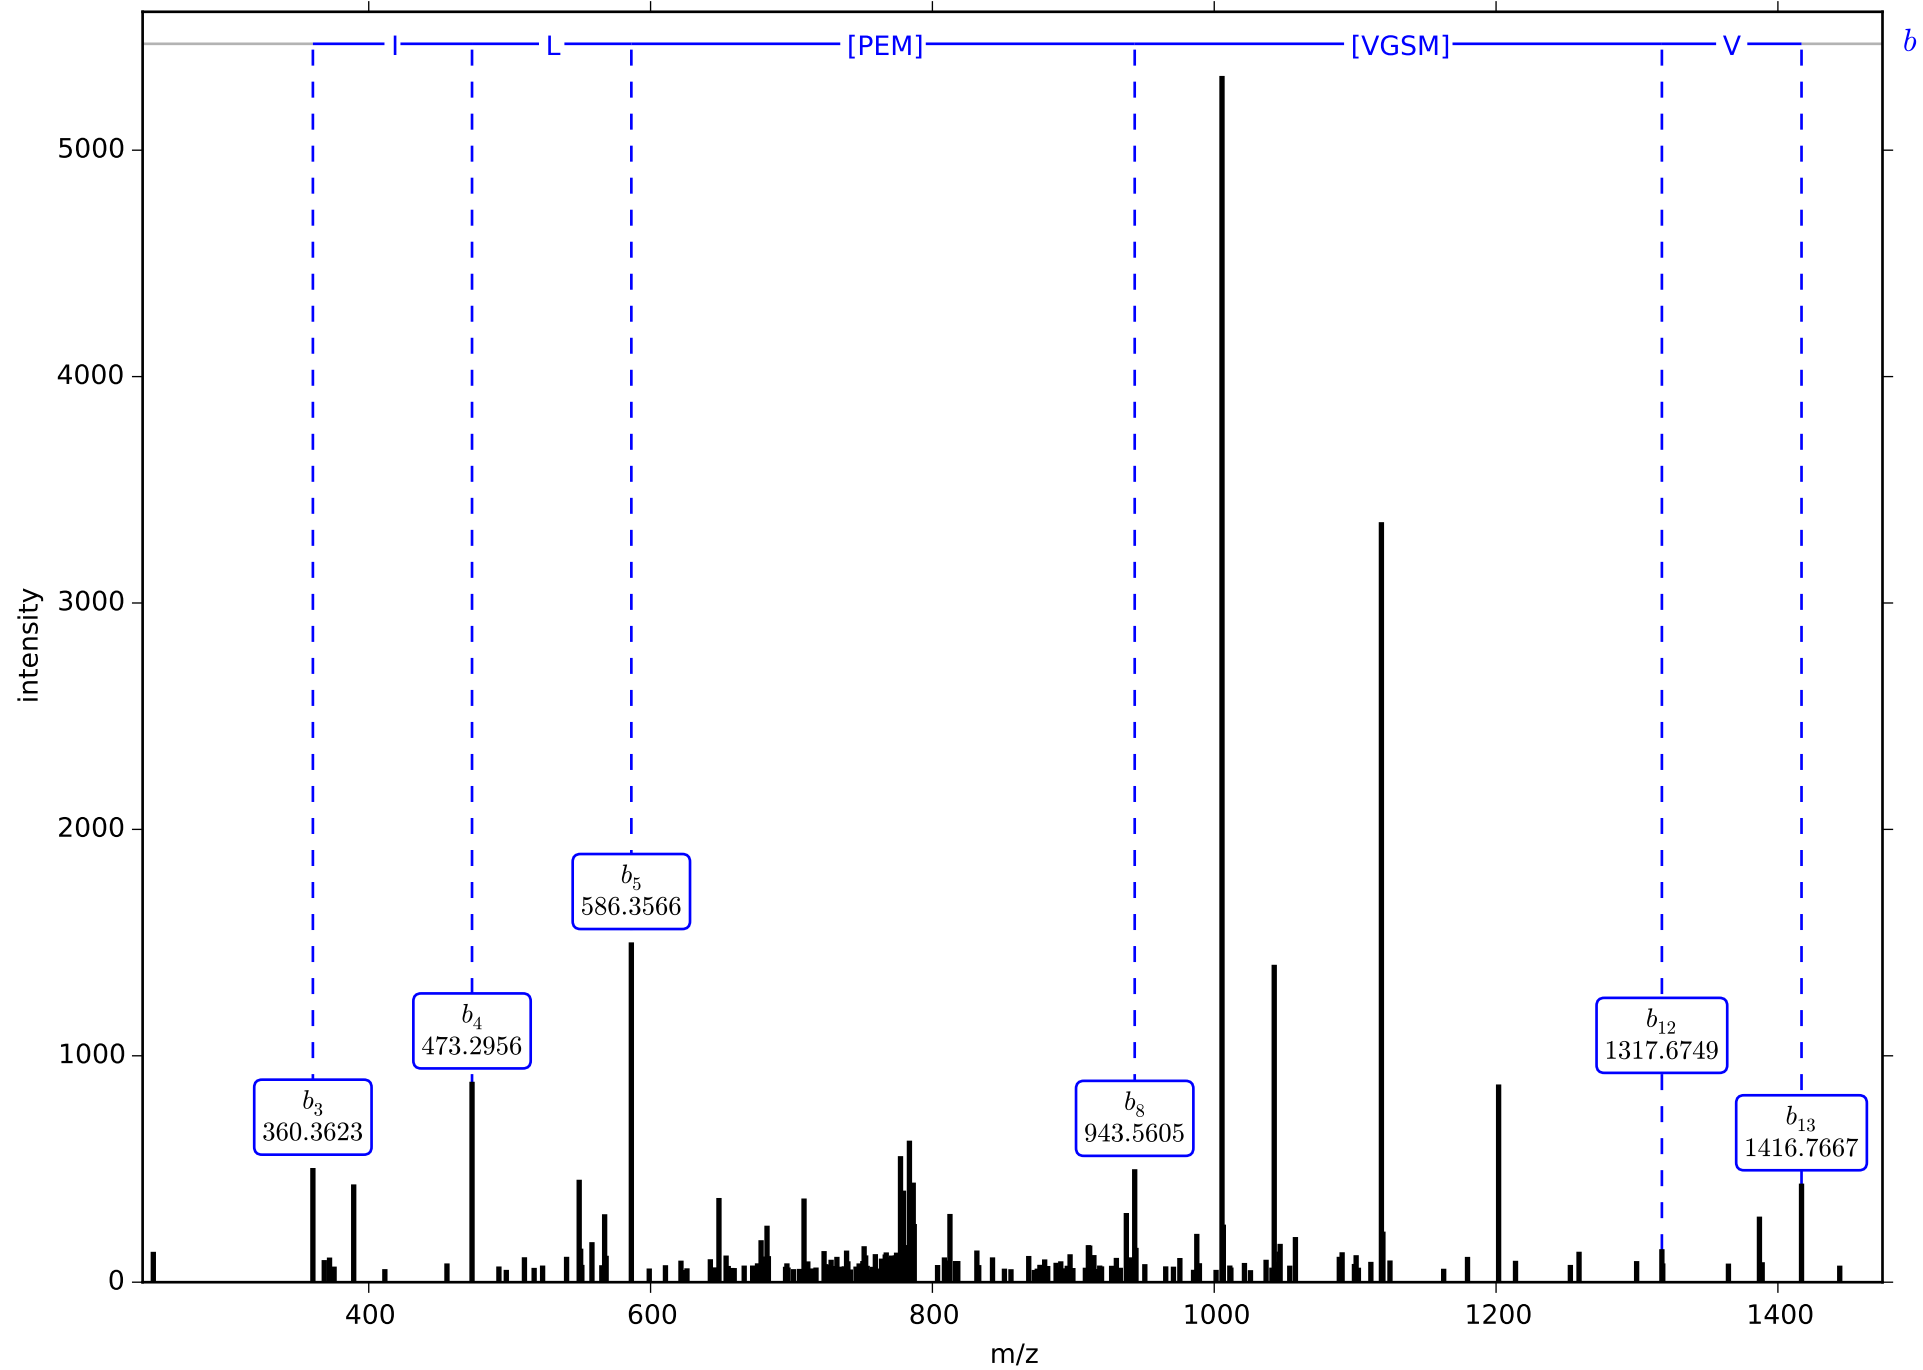

IIYLNQLLQEDSLNV

parent: 887.978699,2+

MSGFScore: 74

QValue: 0

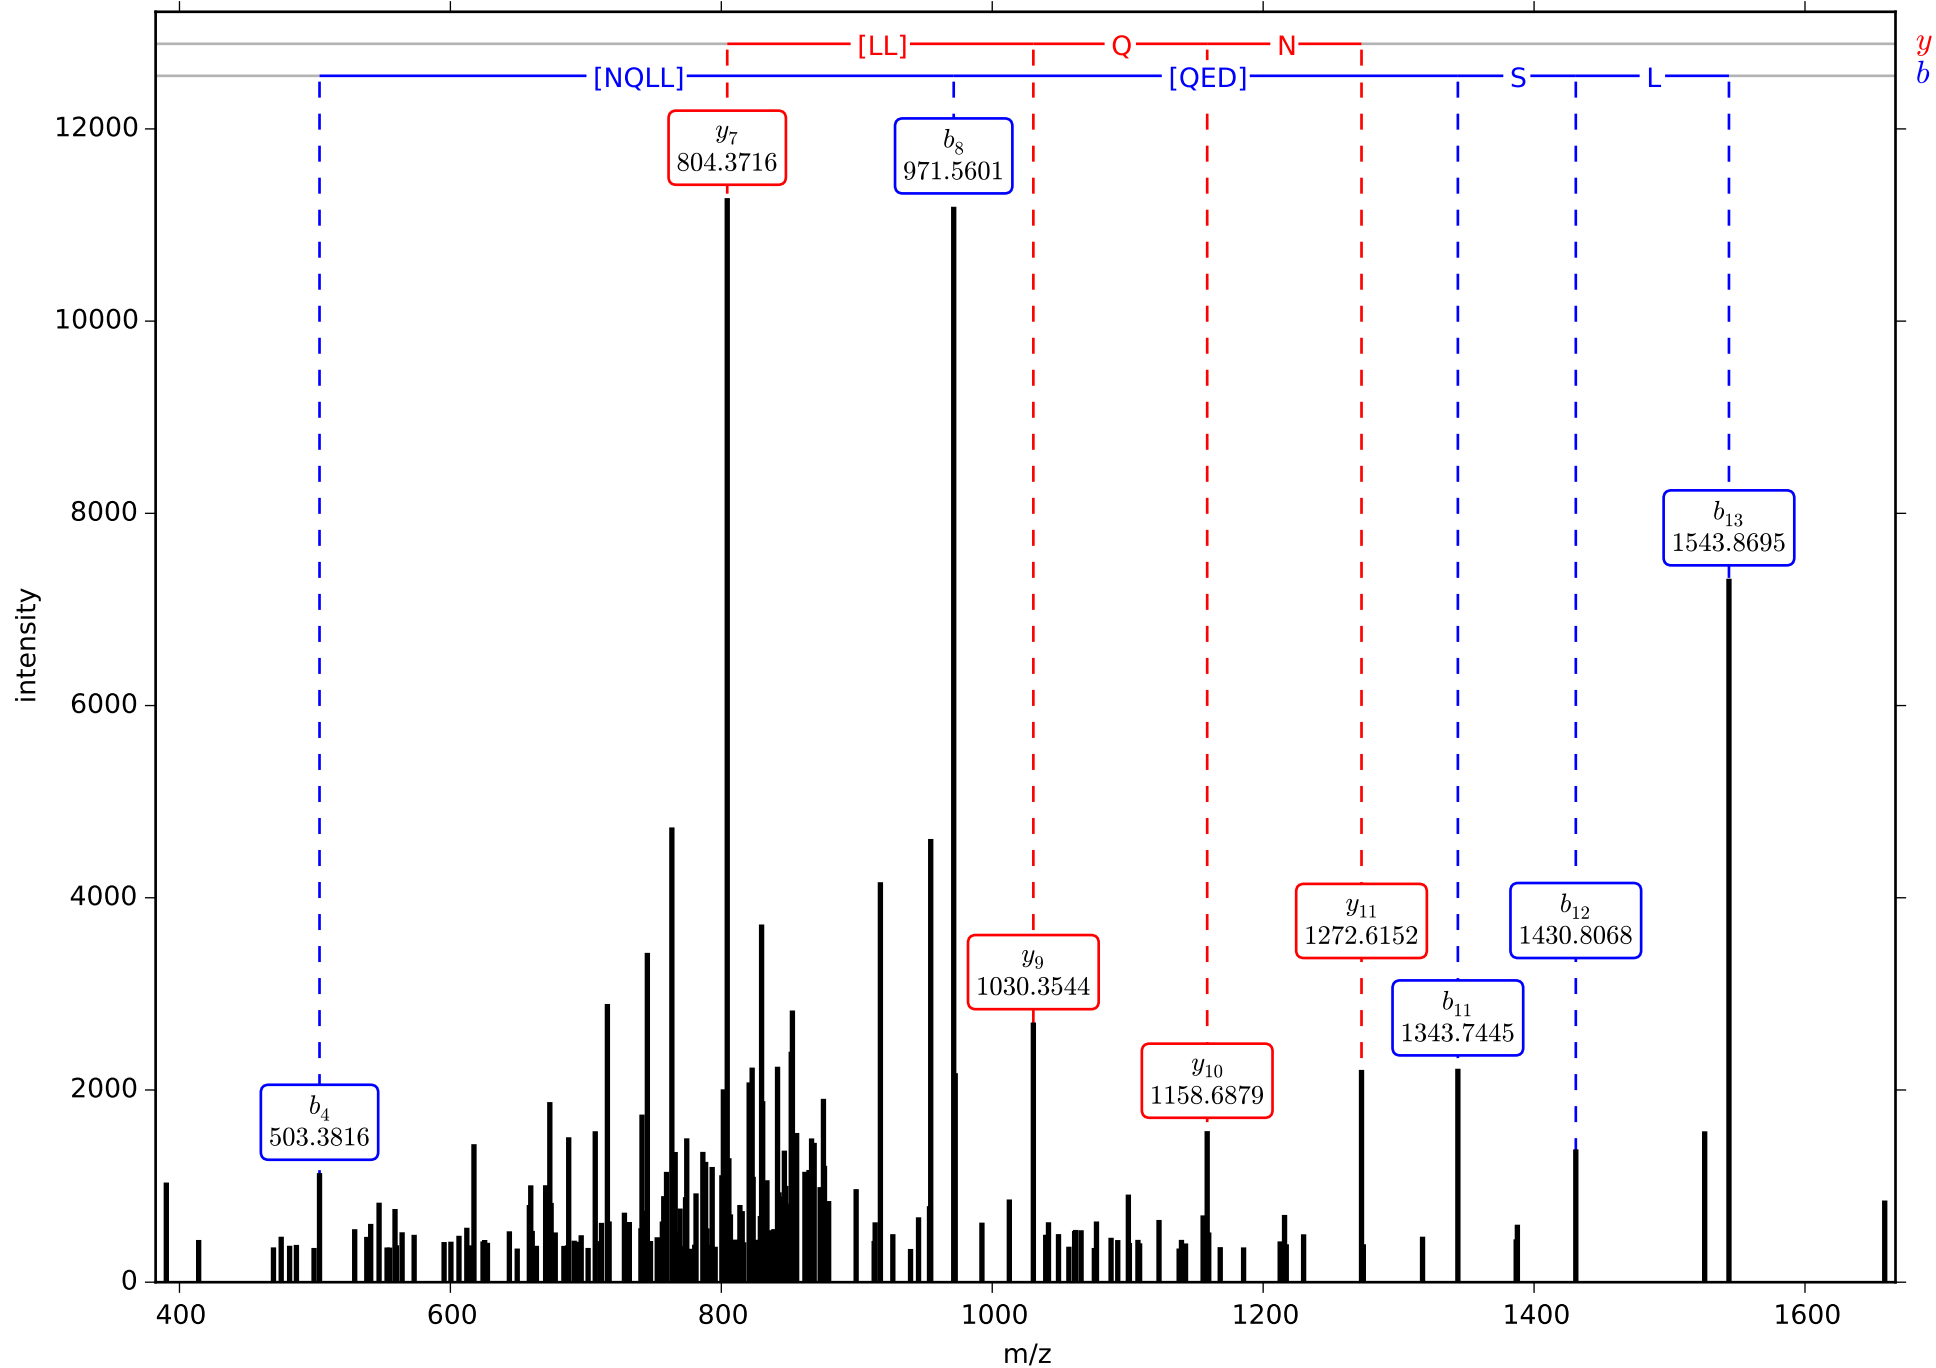

YPVVPVHLDL

parent: 570.307678,2+

MSGFScore: 74

QValue: 0

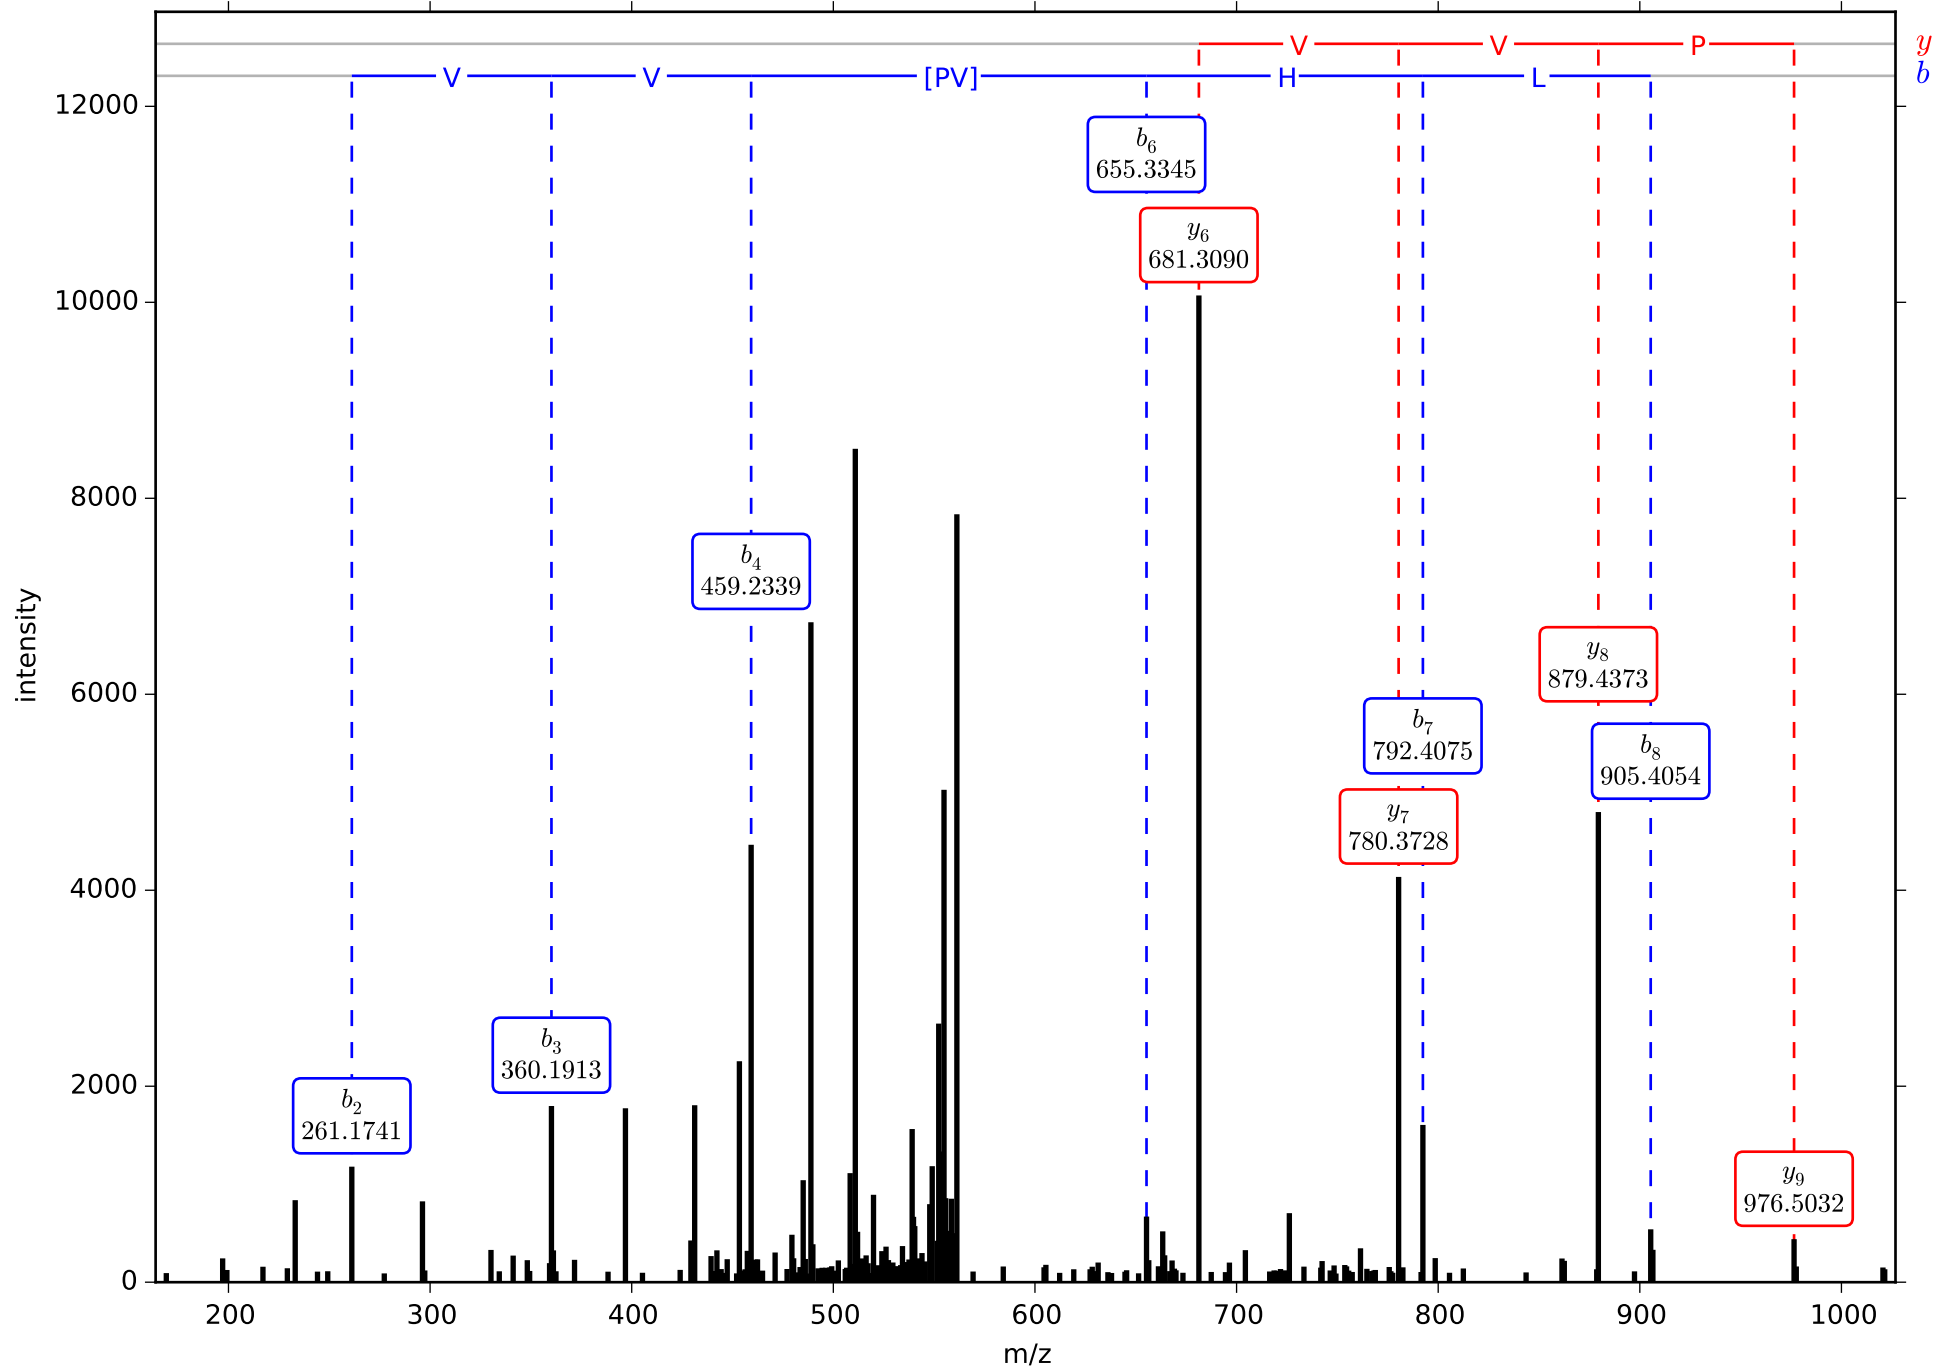



# VADALTNVAHV

parent: 590.823425,2+

MSGFScore: 76

QValue: 0

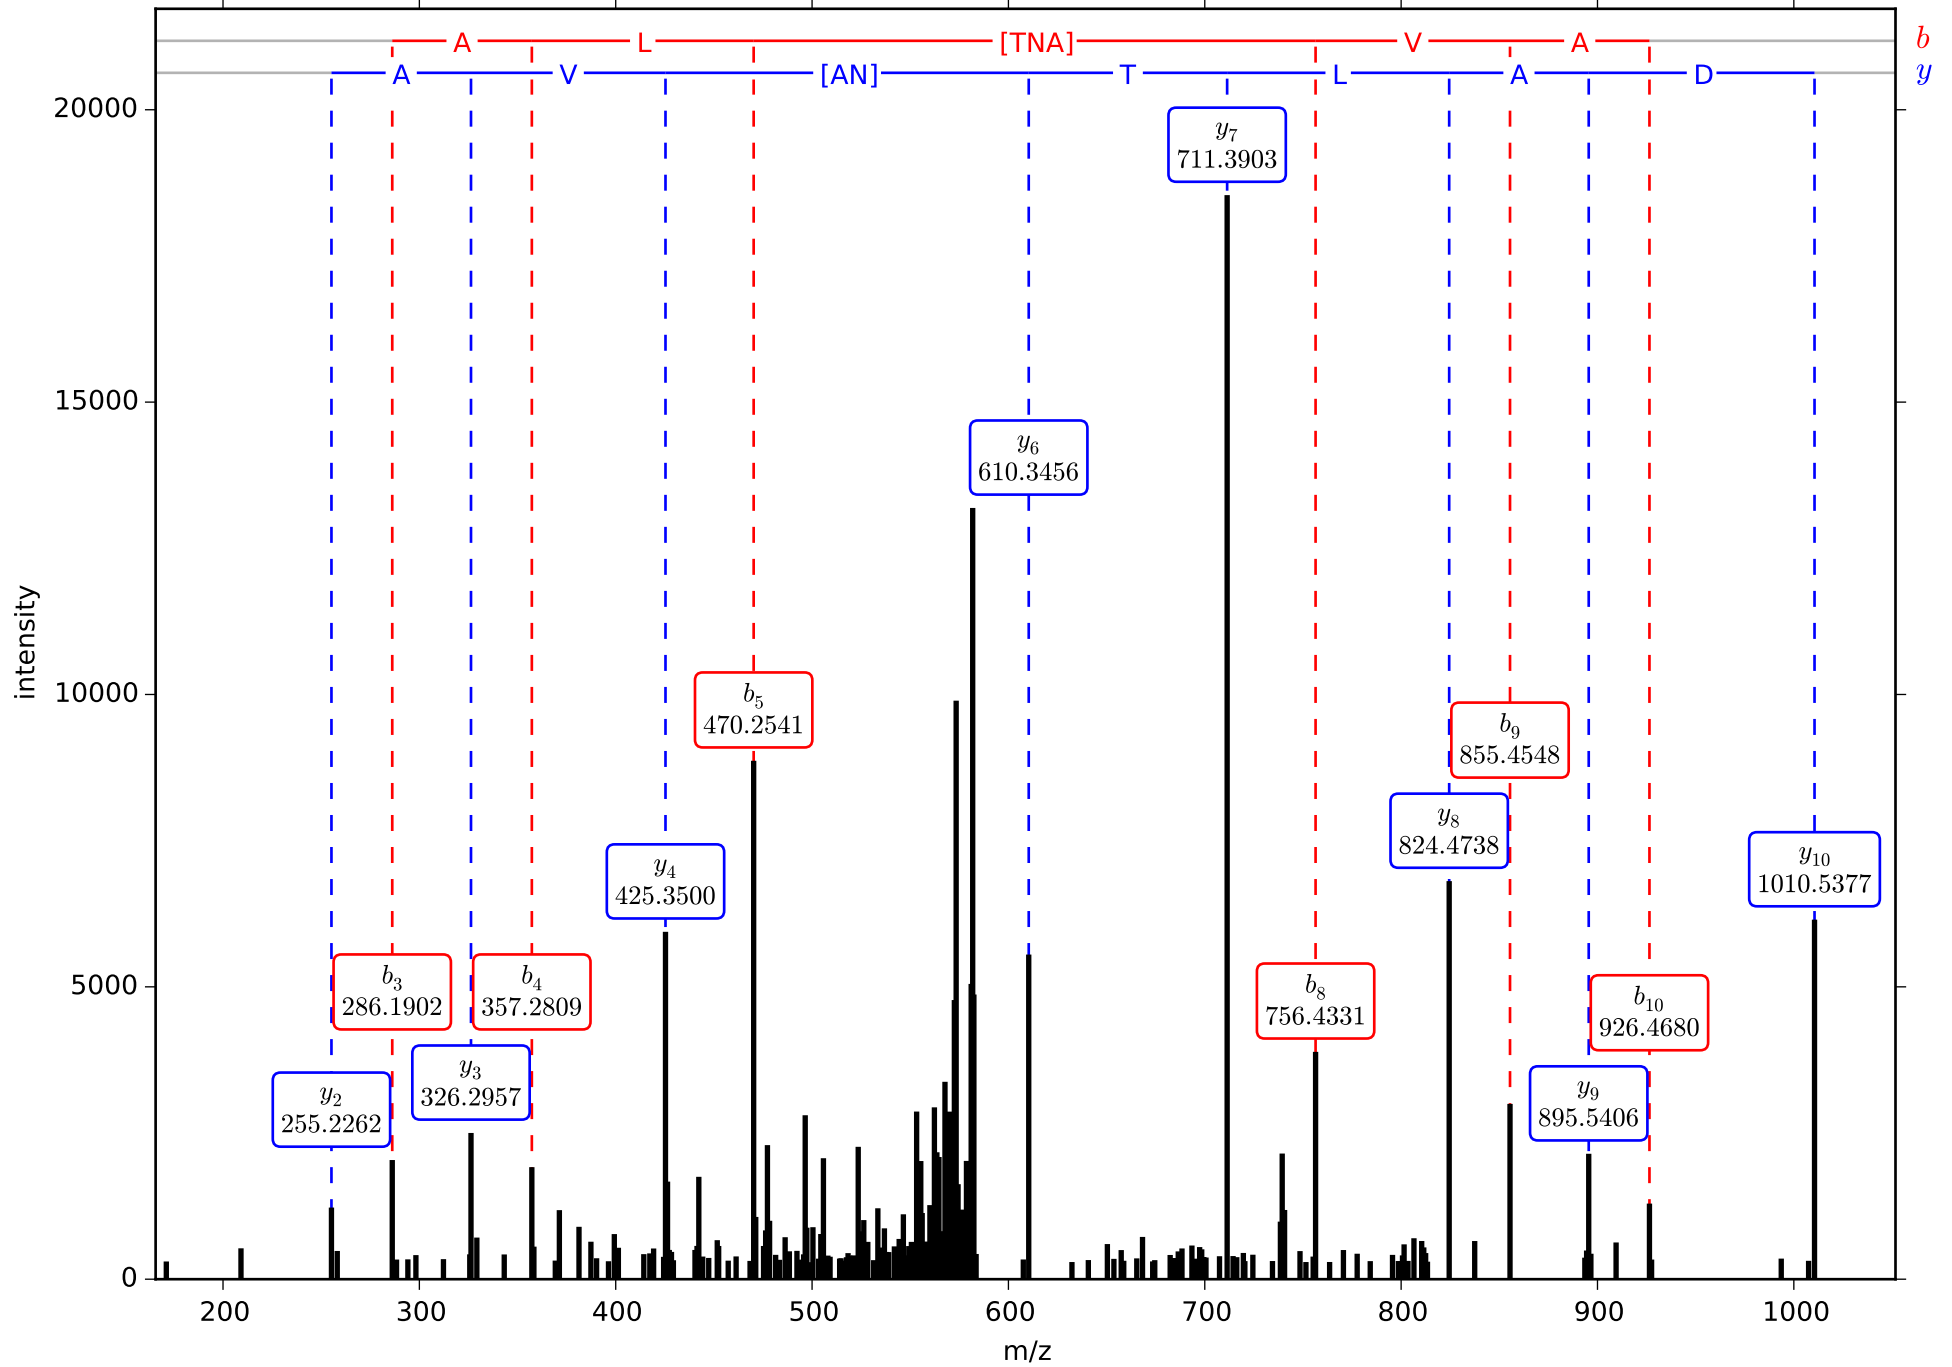

TFPGFFSPMLGEFV

parent: 788.381958,2+

MSGFScore: 76

QValue: 0

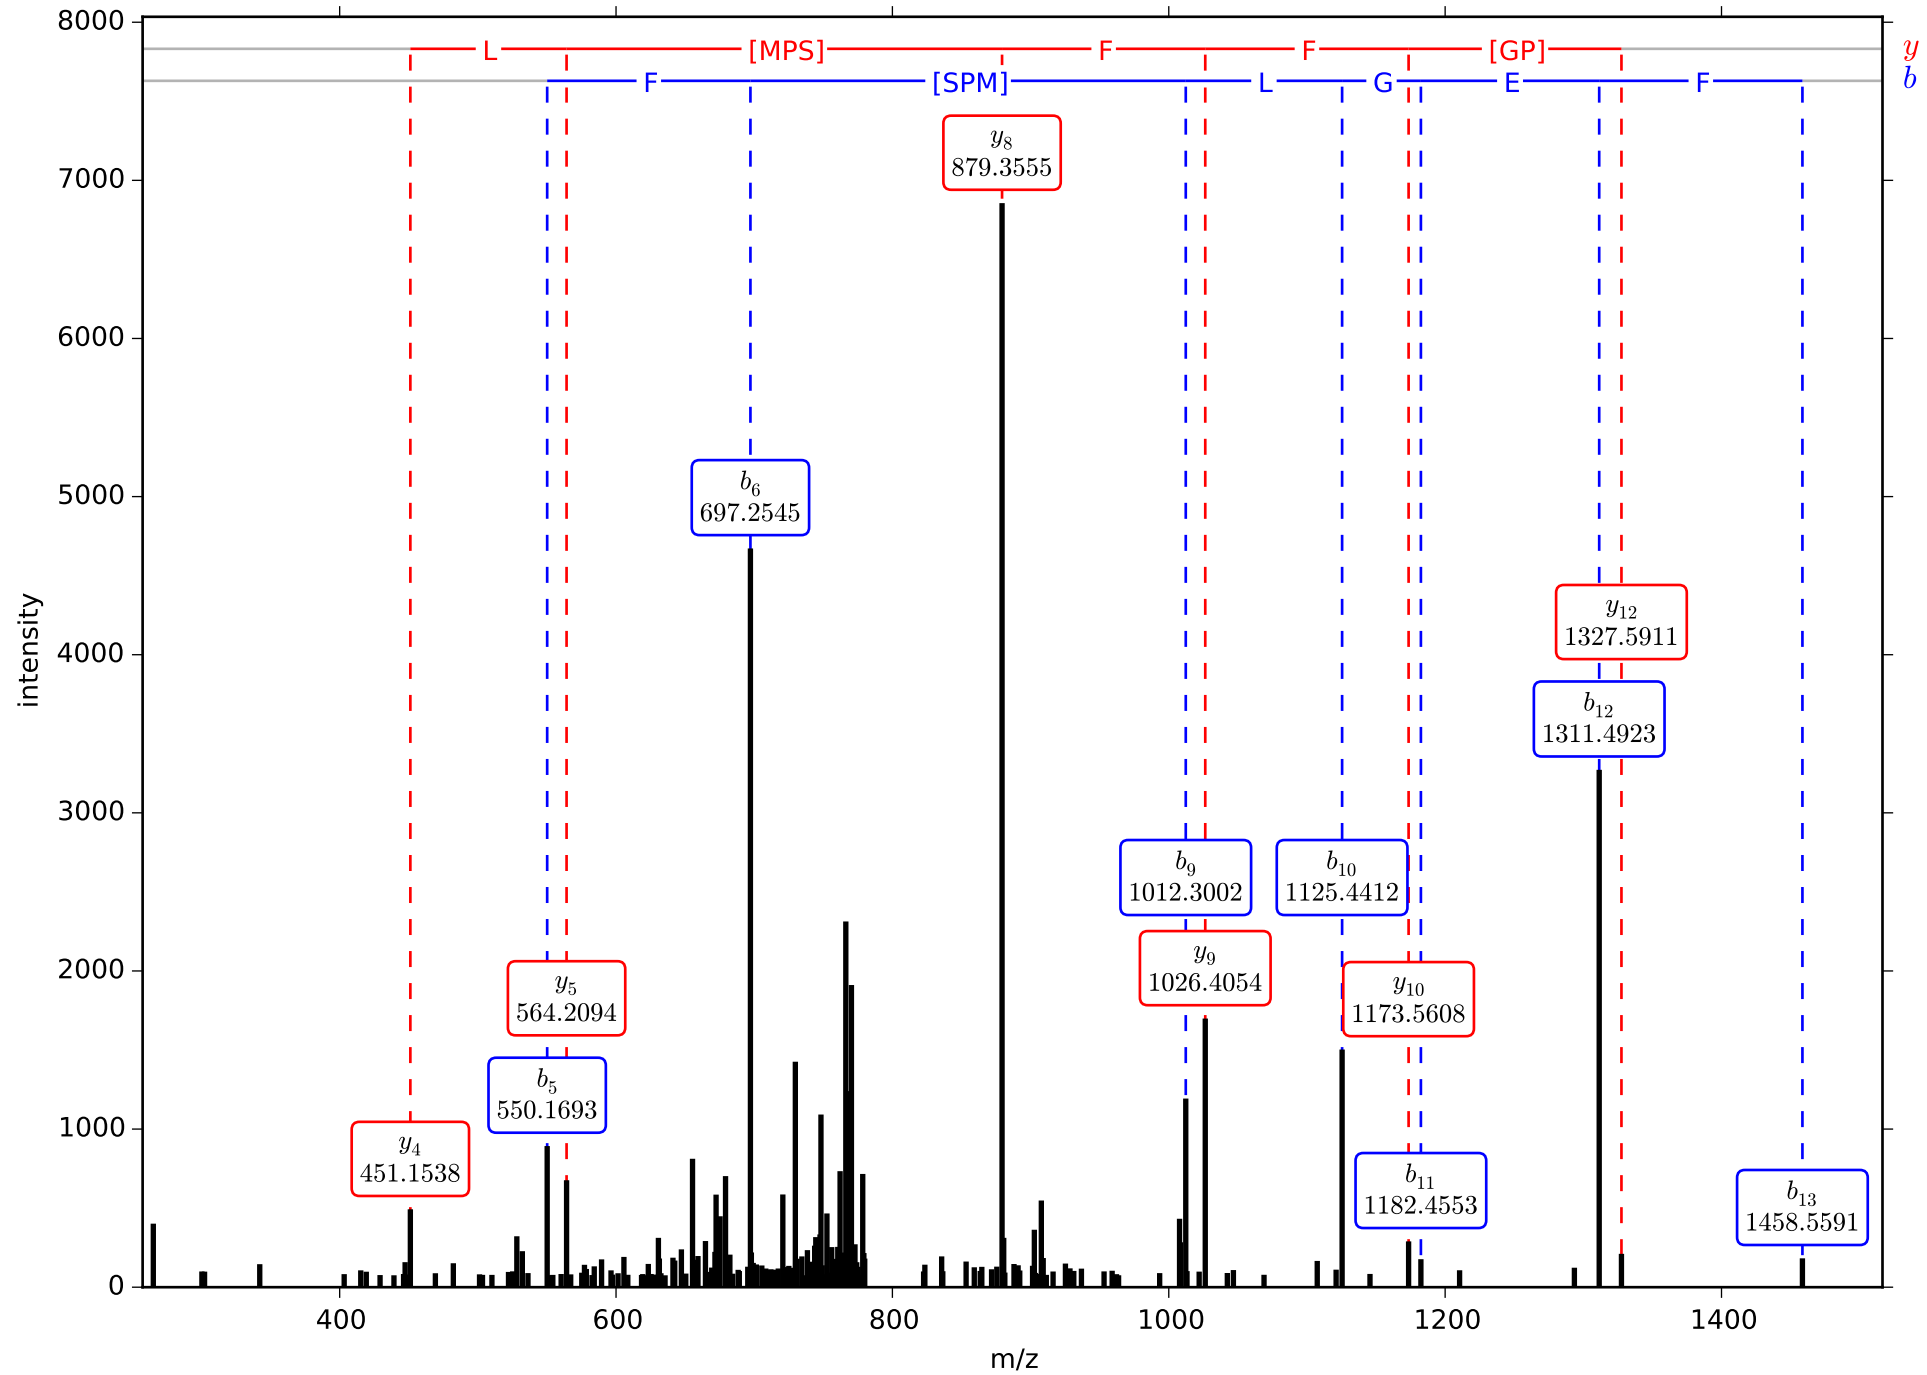

# KGGSYSQAASSDSAQGS DV

parent: 901.397095,2+

MSGFScore: 76

QValue: 0.000428449

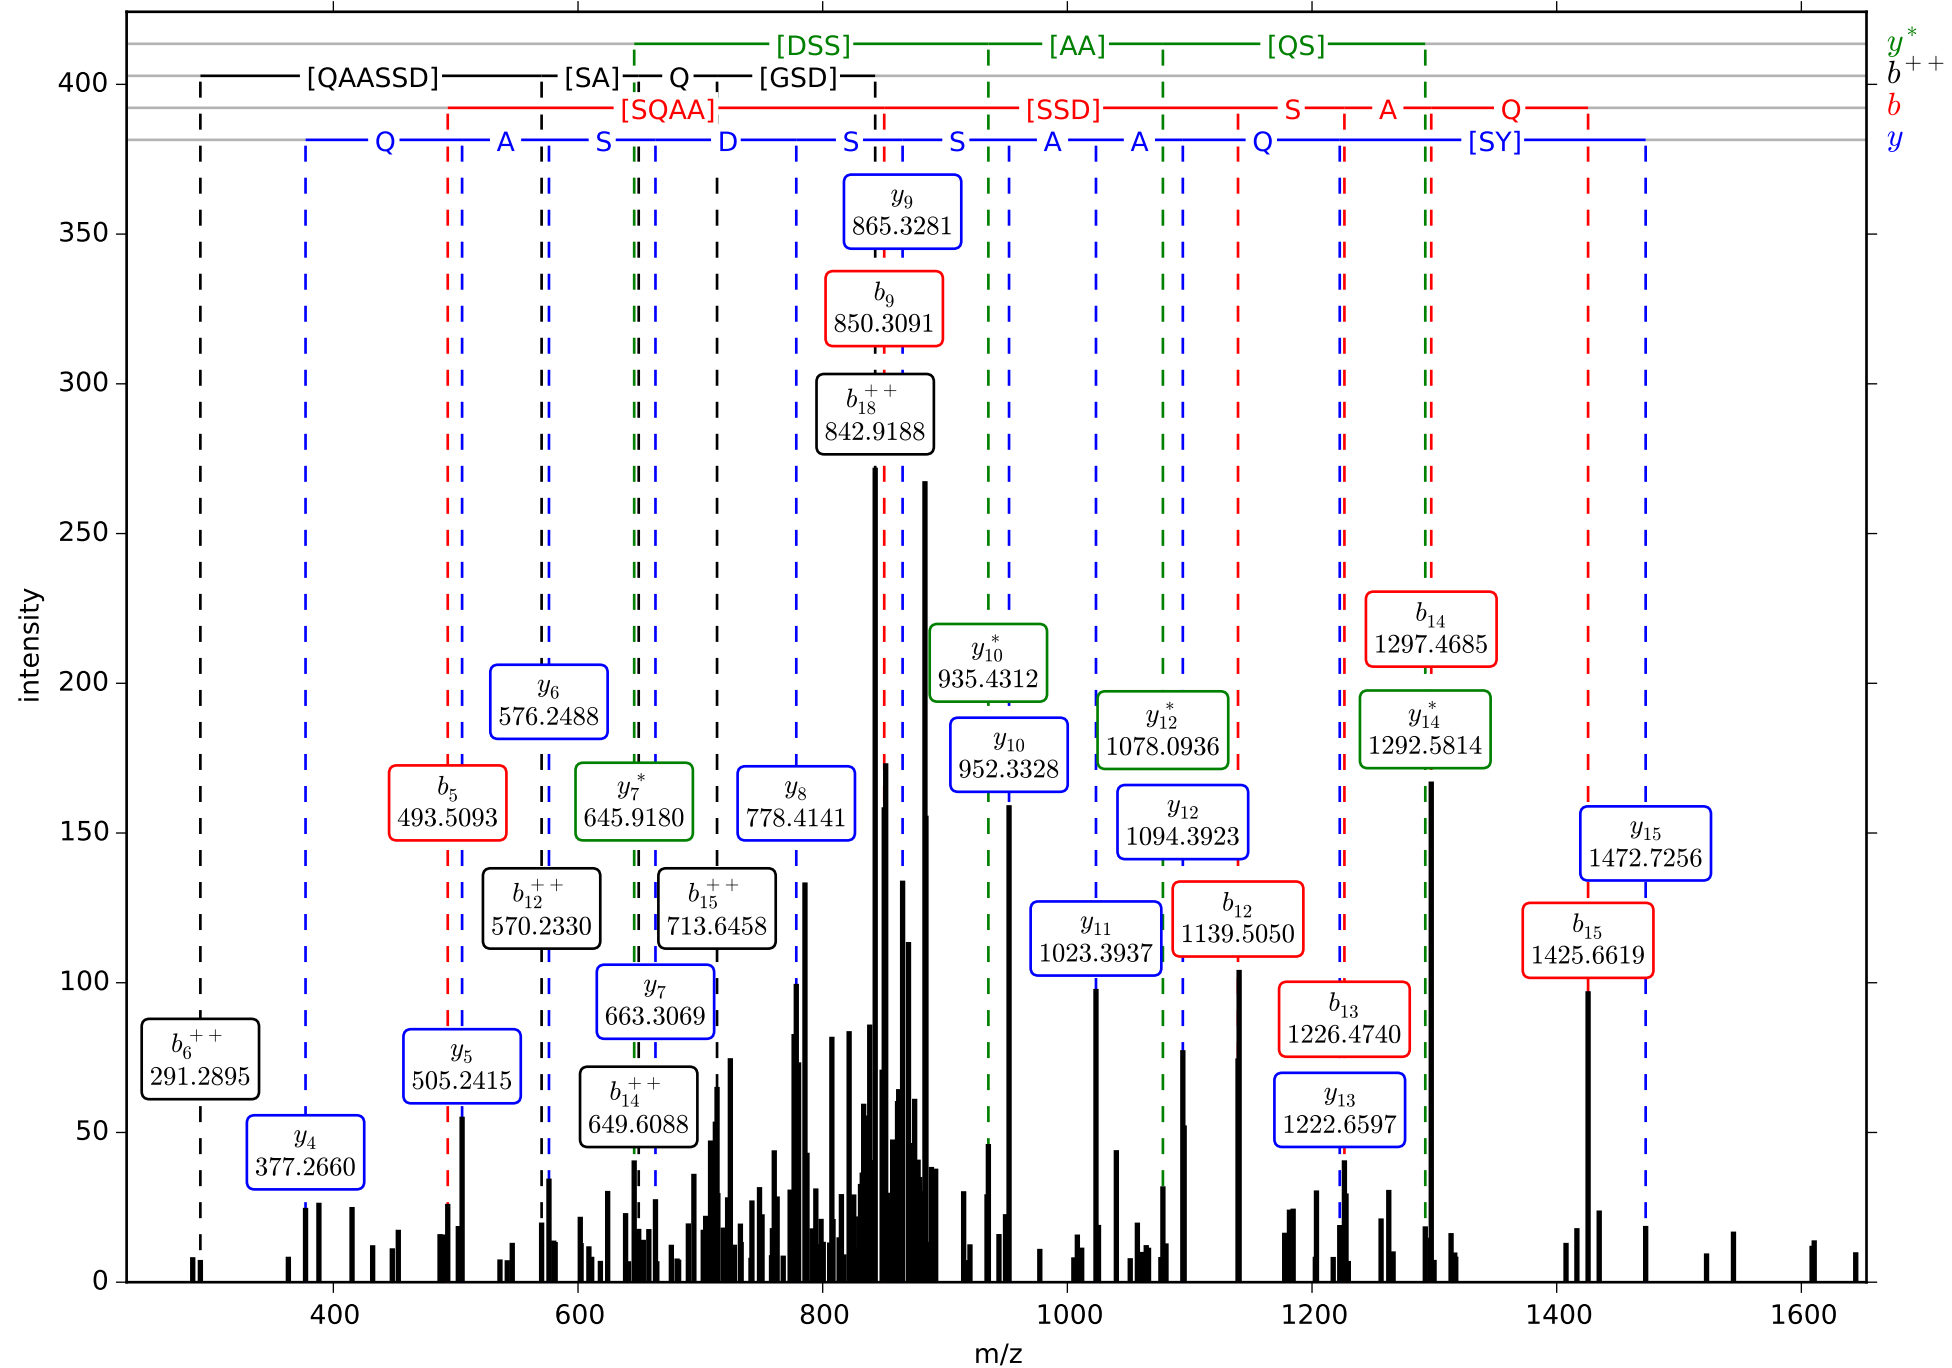

# AGTELVNFLSYFV

parent: 730.376648,2+

MSGFScore: 78

QValue: 0.000805802

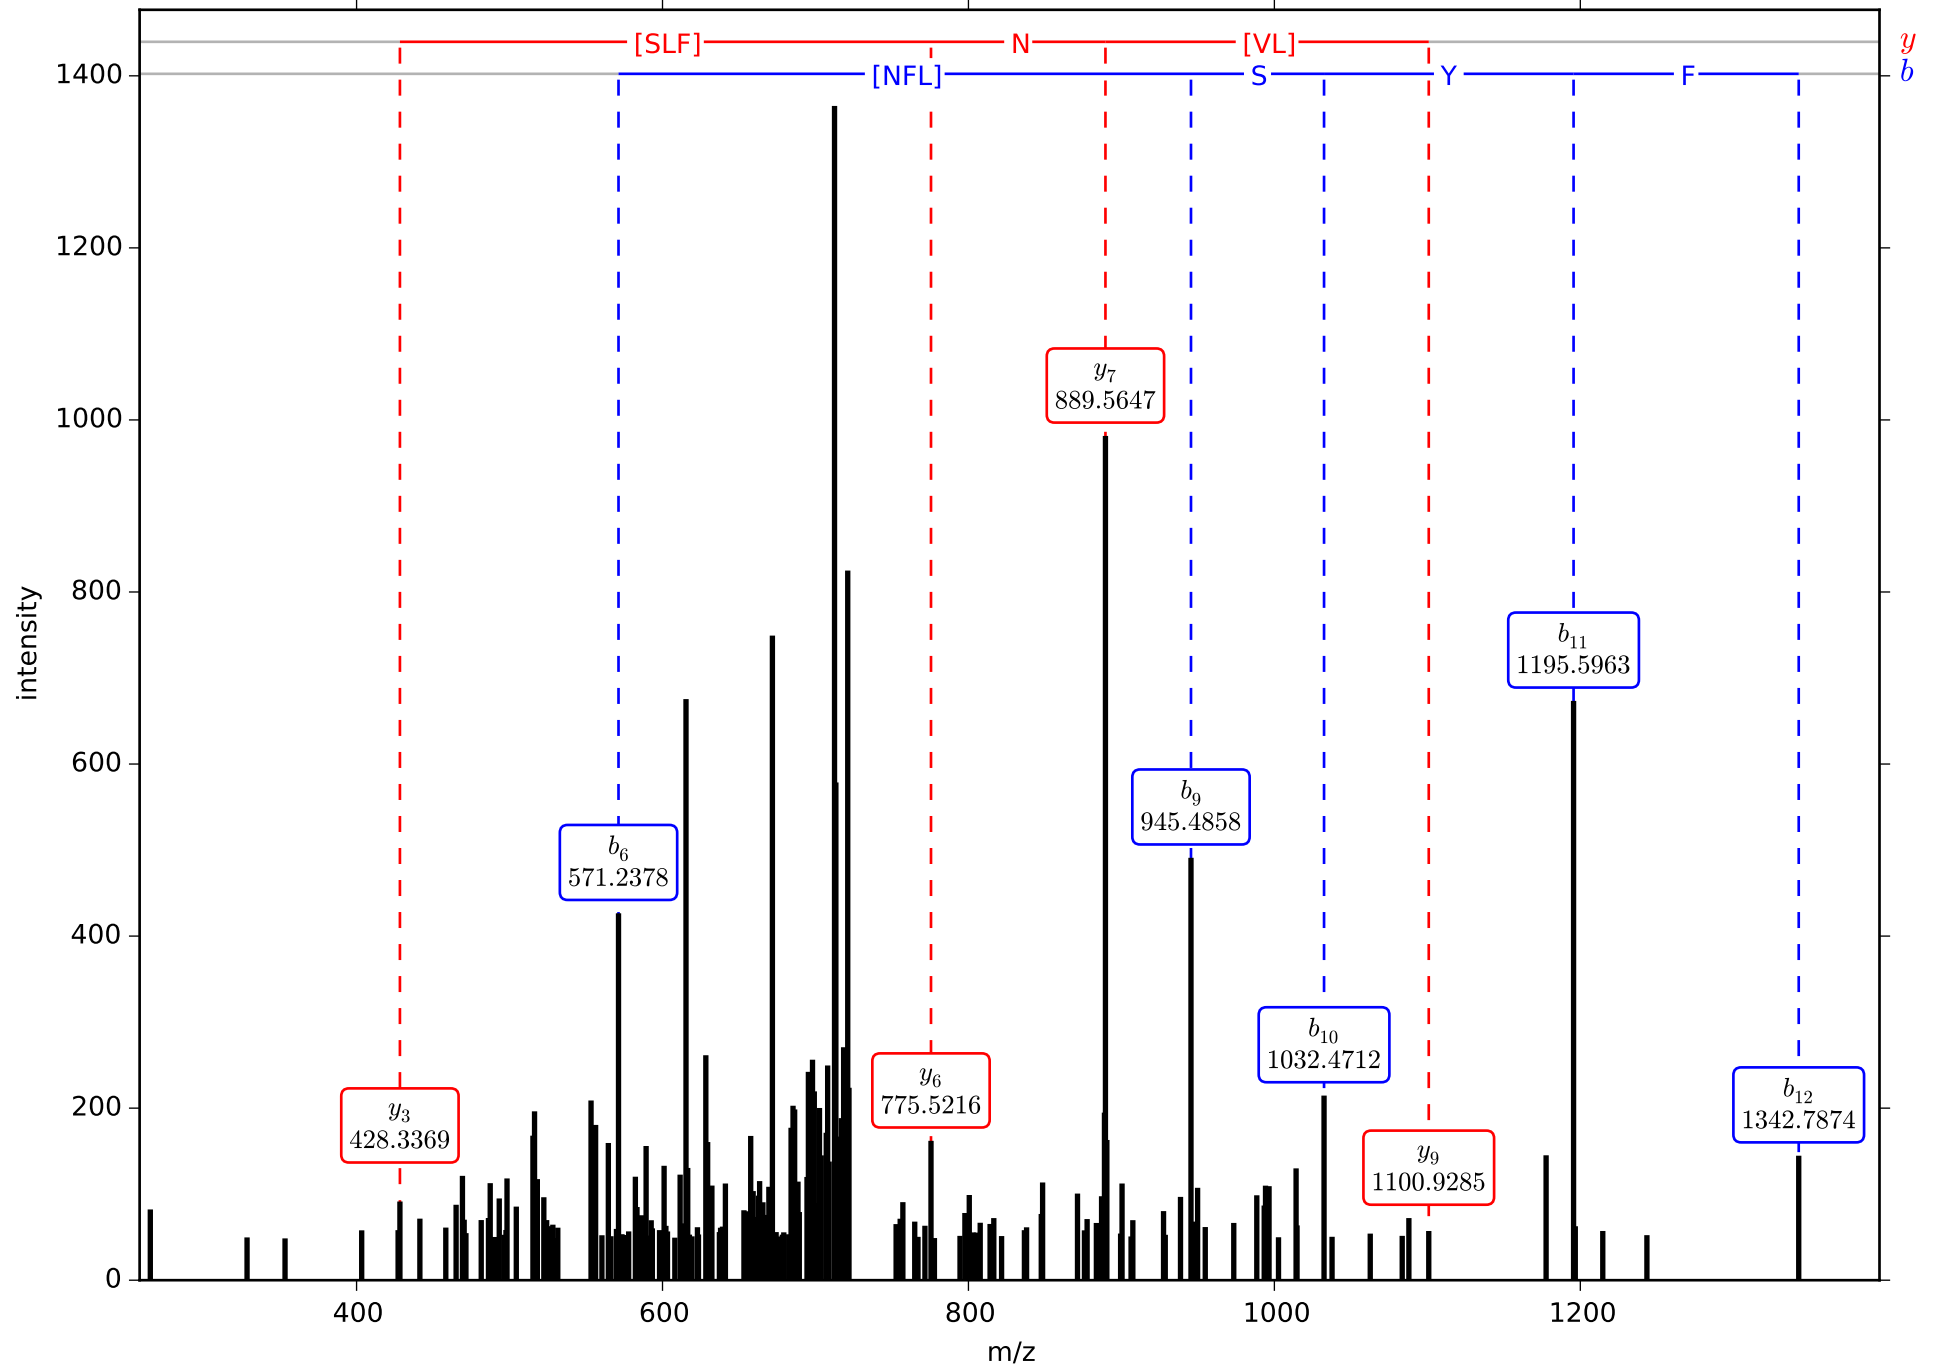

HTSVQTTSSGSGPFTDV

parent: 854.395874,2+

MSGFScore: 80

QValue: 0

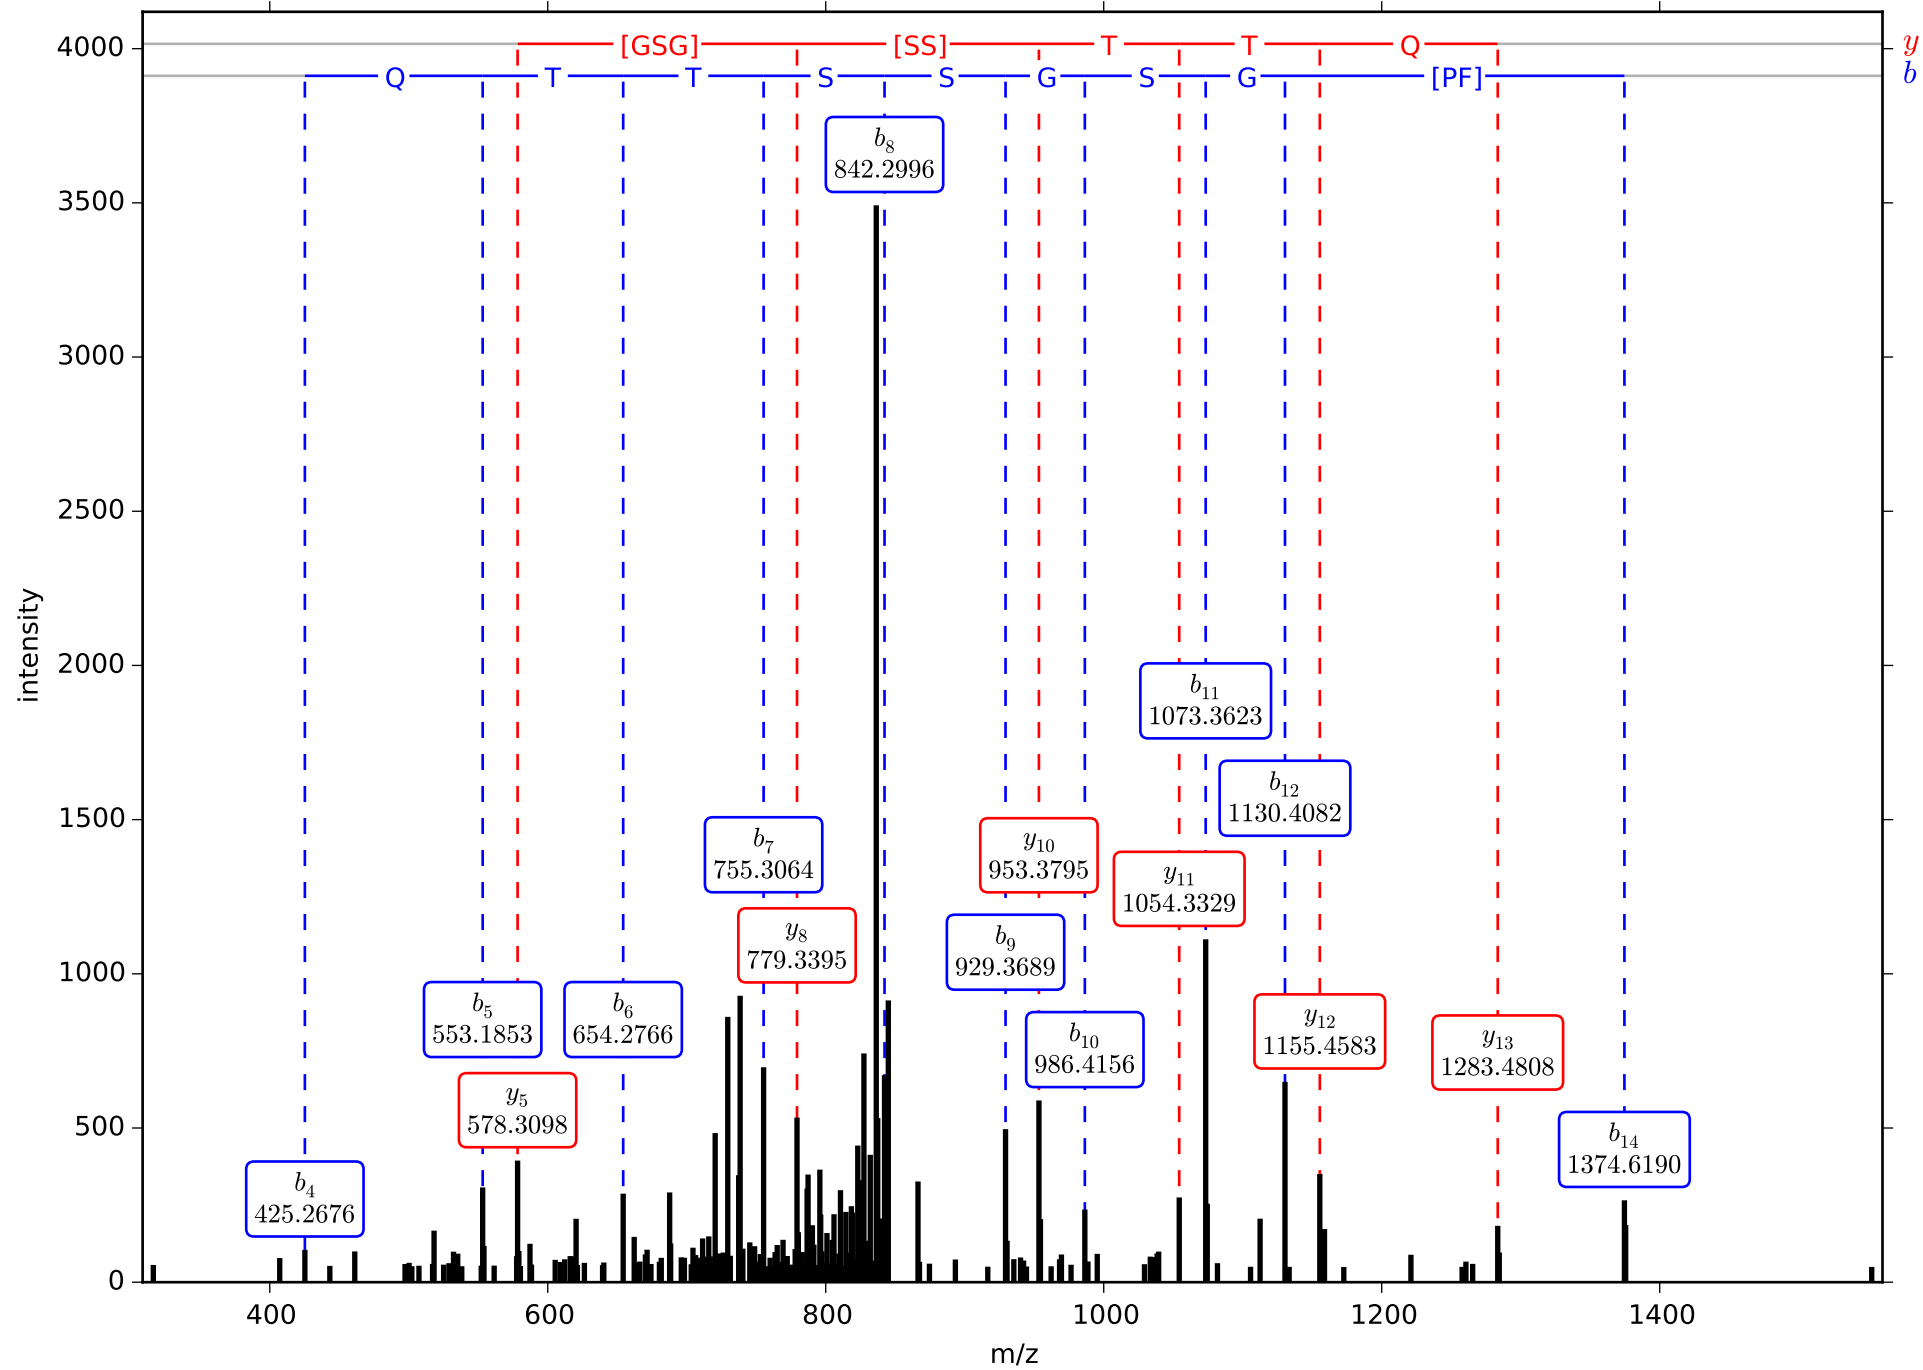

# GGLGGGYGGASGMGGITAV

parent: 769.860718,2+

MSGFScore: 80

QValue: 0.00229973

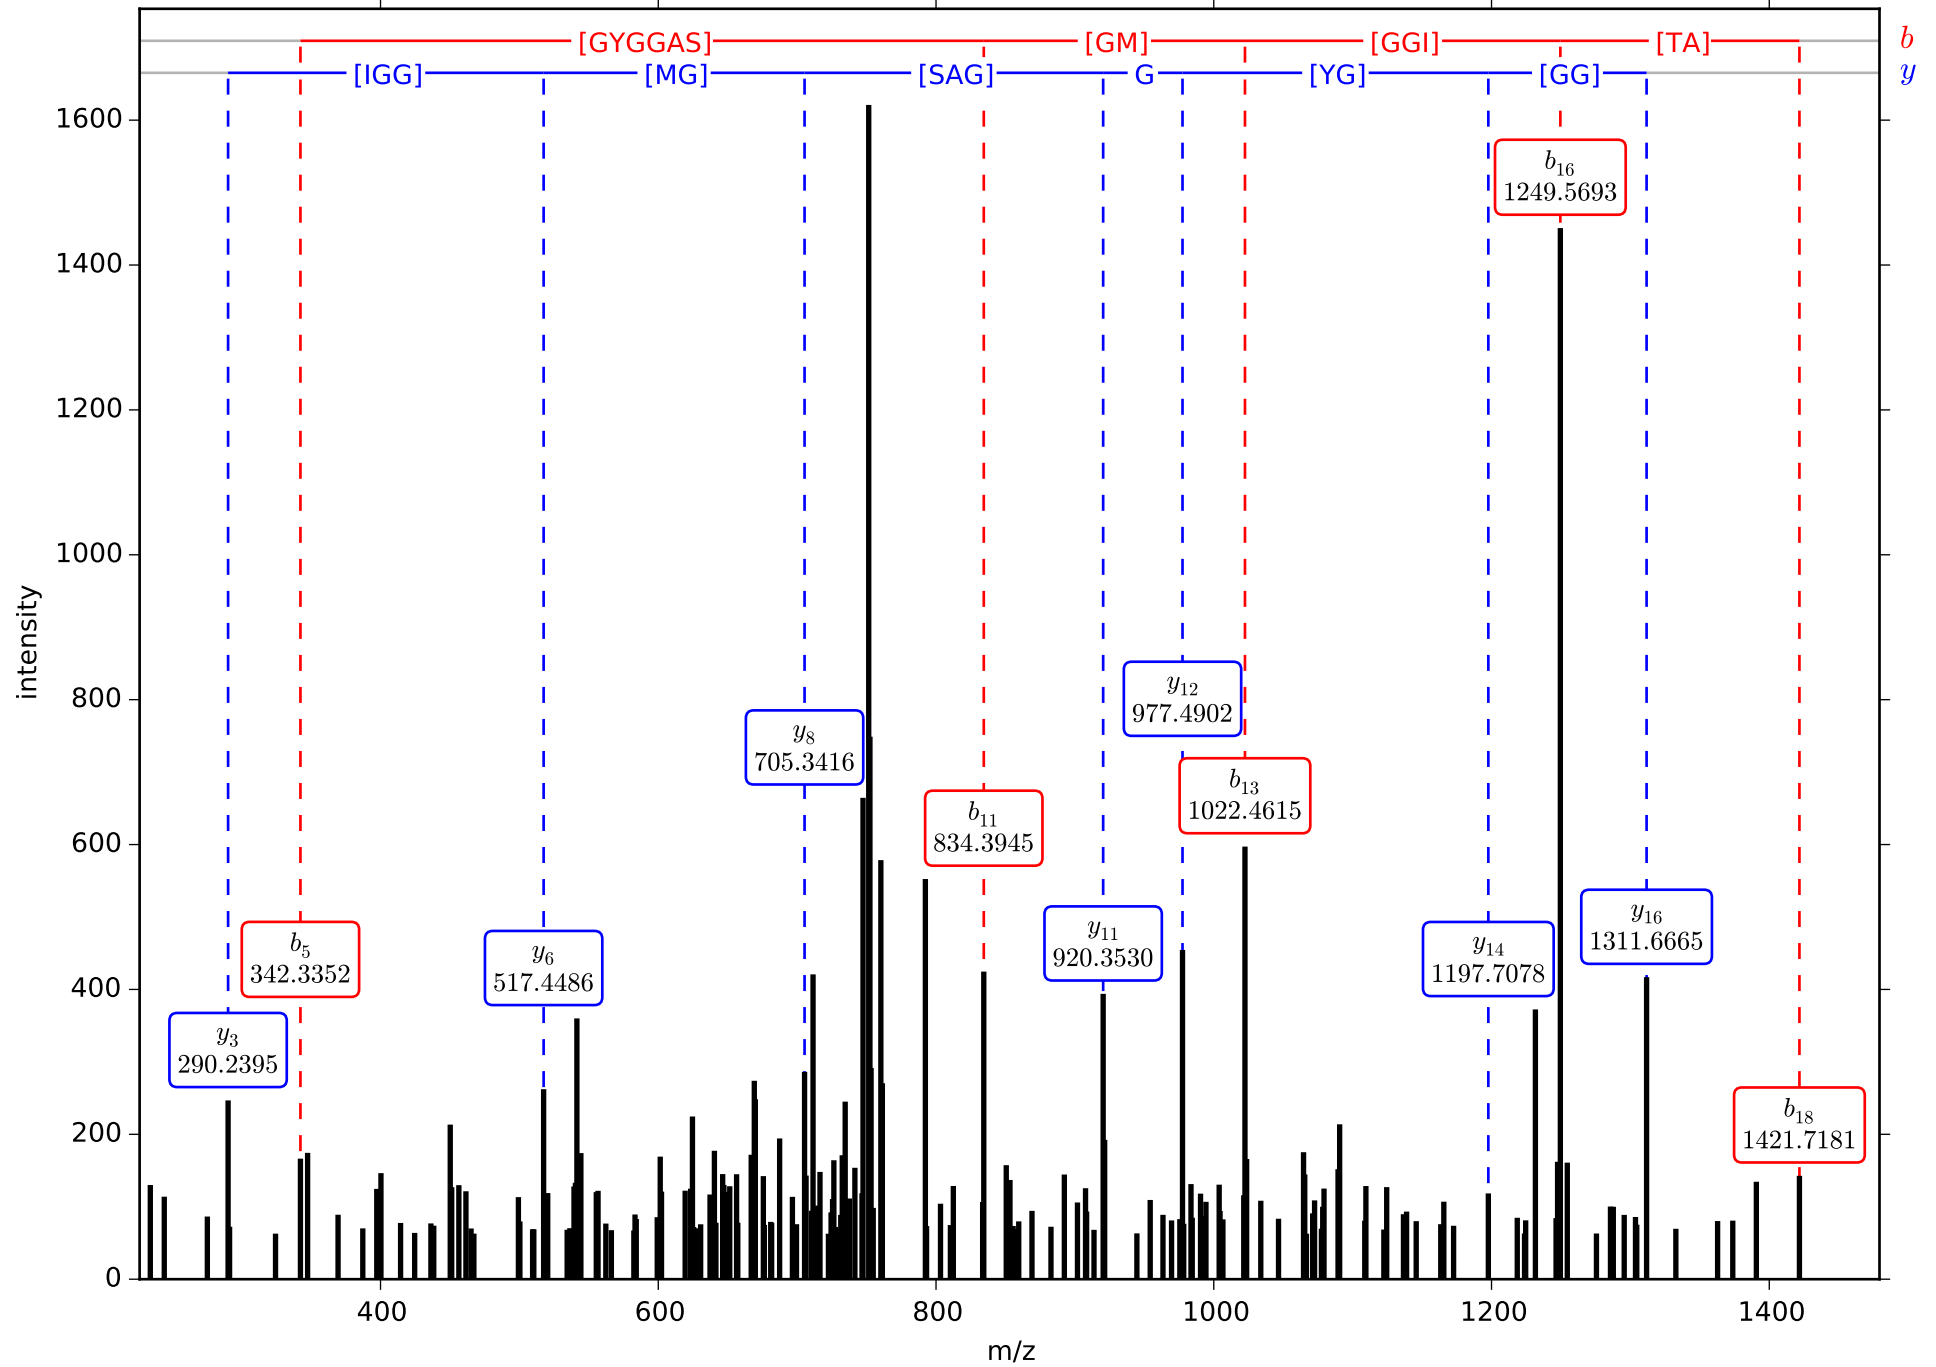

KVPQVSTPTLVEV

parent: 698.905823,2+

MSGFScore: 82

QValue: 0

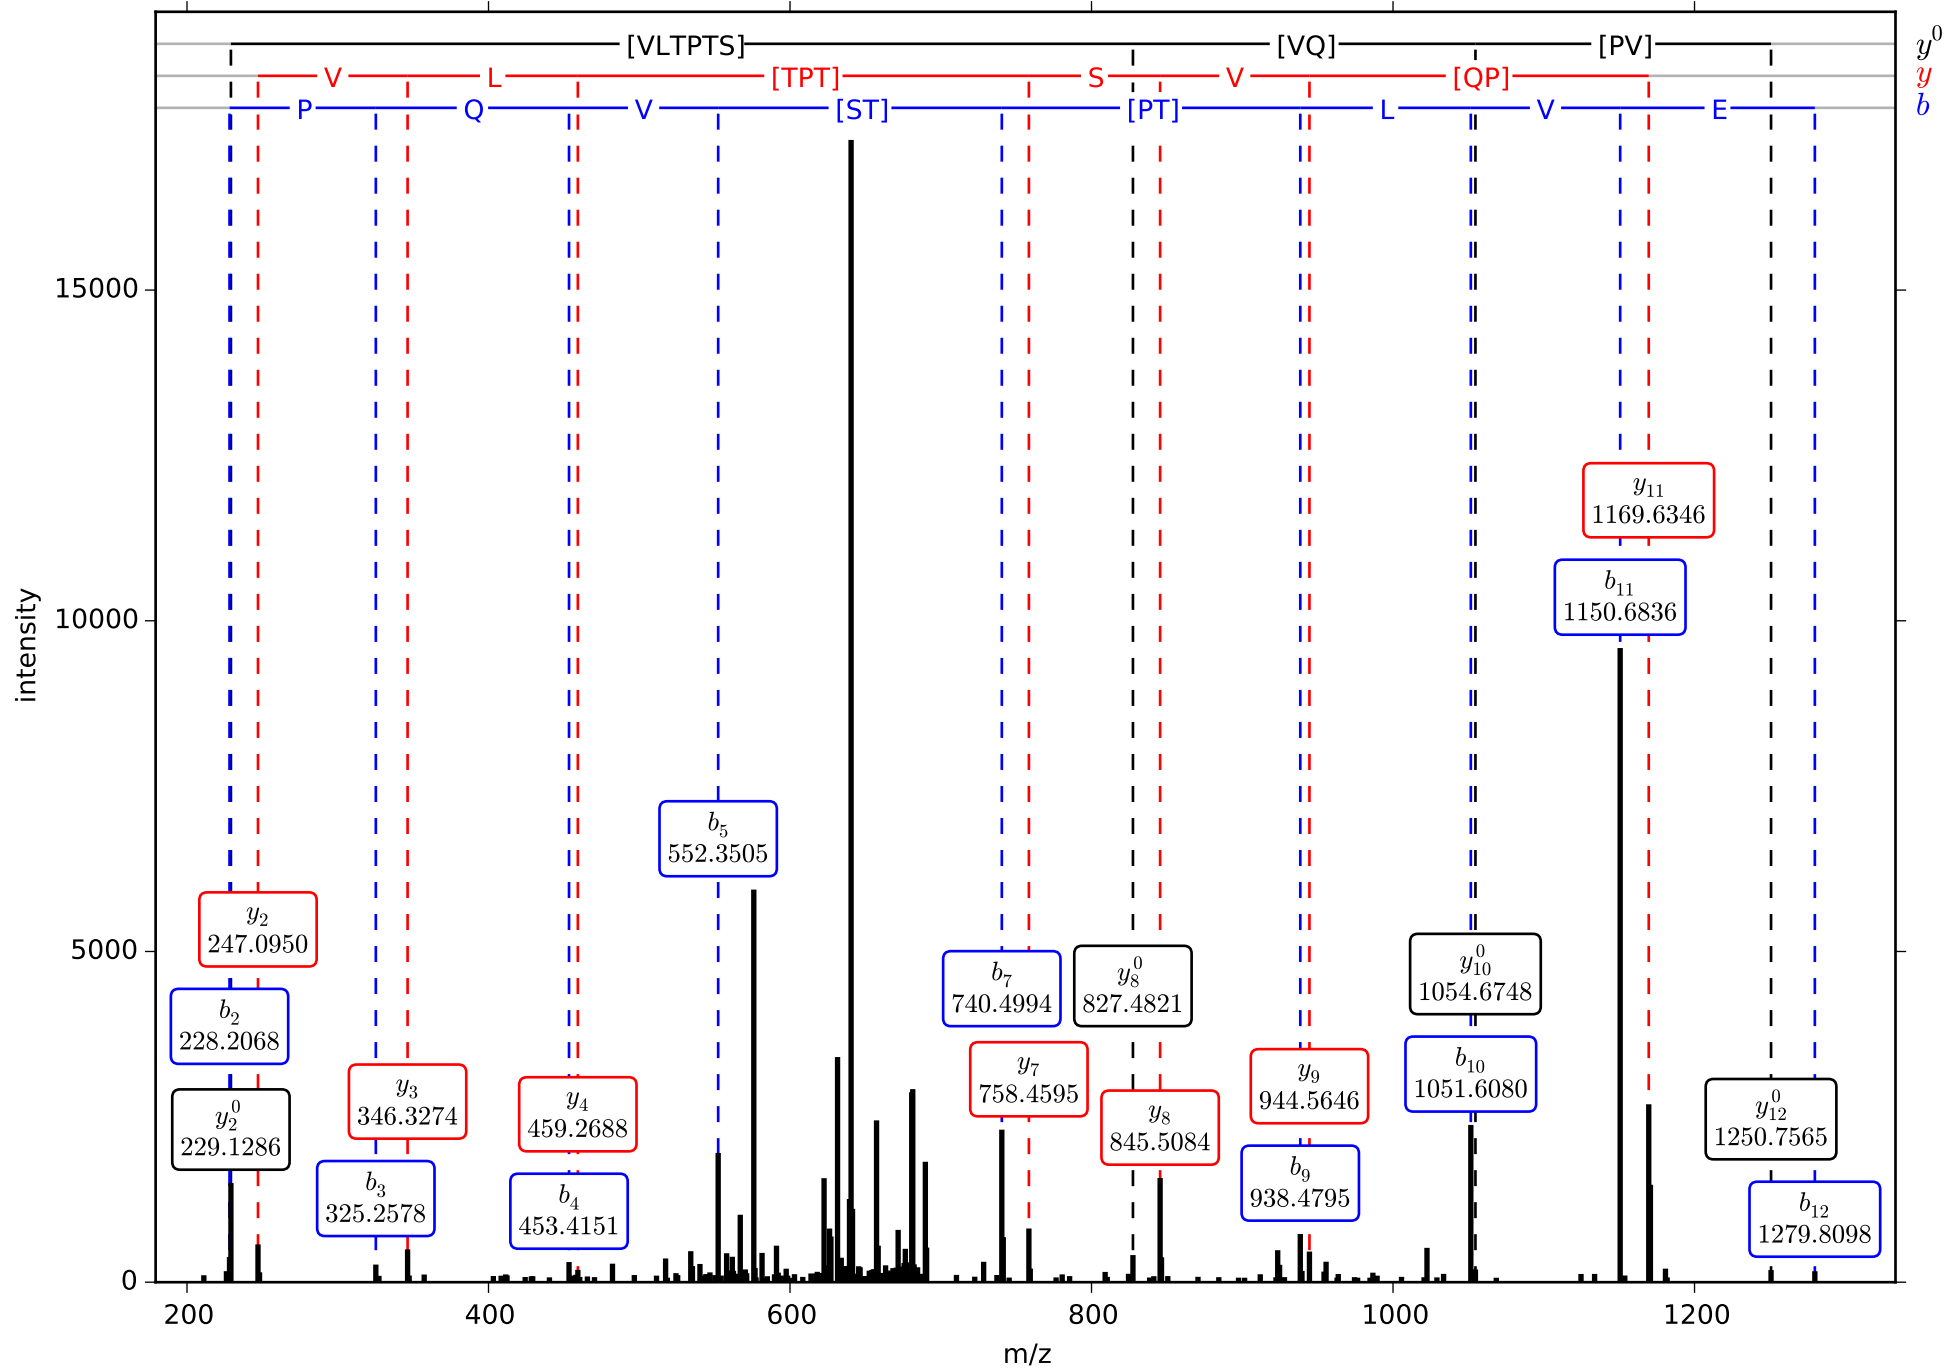

YPVVPVHLDTT

parent: 620.834839,2+

MSGFScore: 82

QValue: 0.000489237

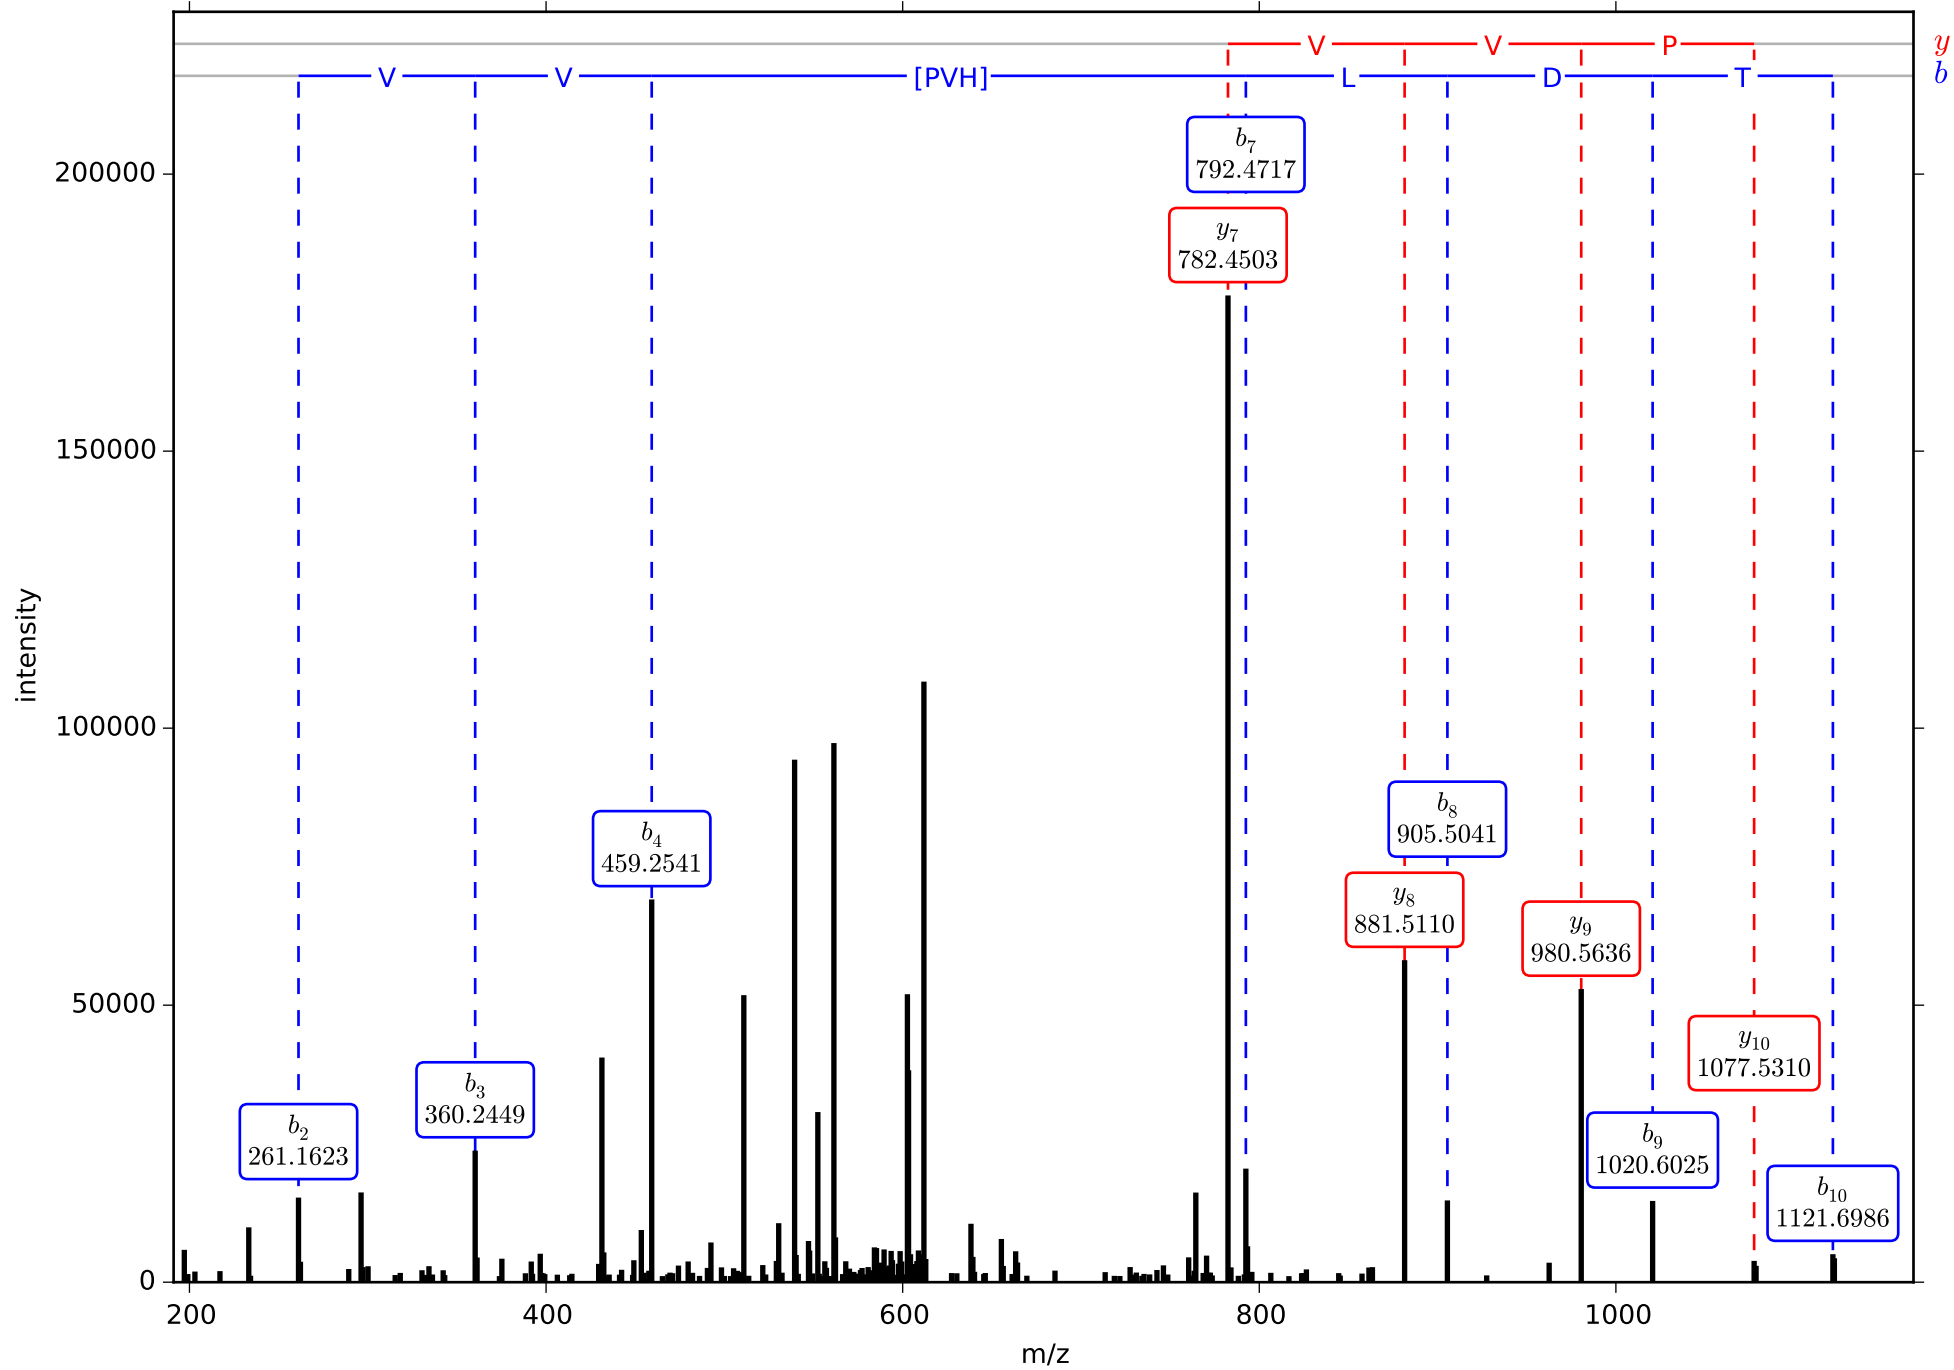



ISSIQATTAAGSGHPT

parent: 749.876953,2+

MSGFScore: 85

QValue: 0

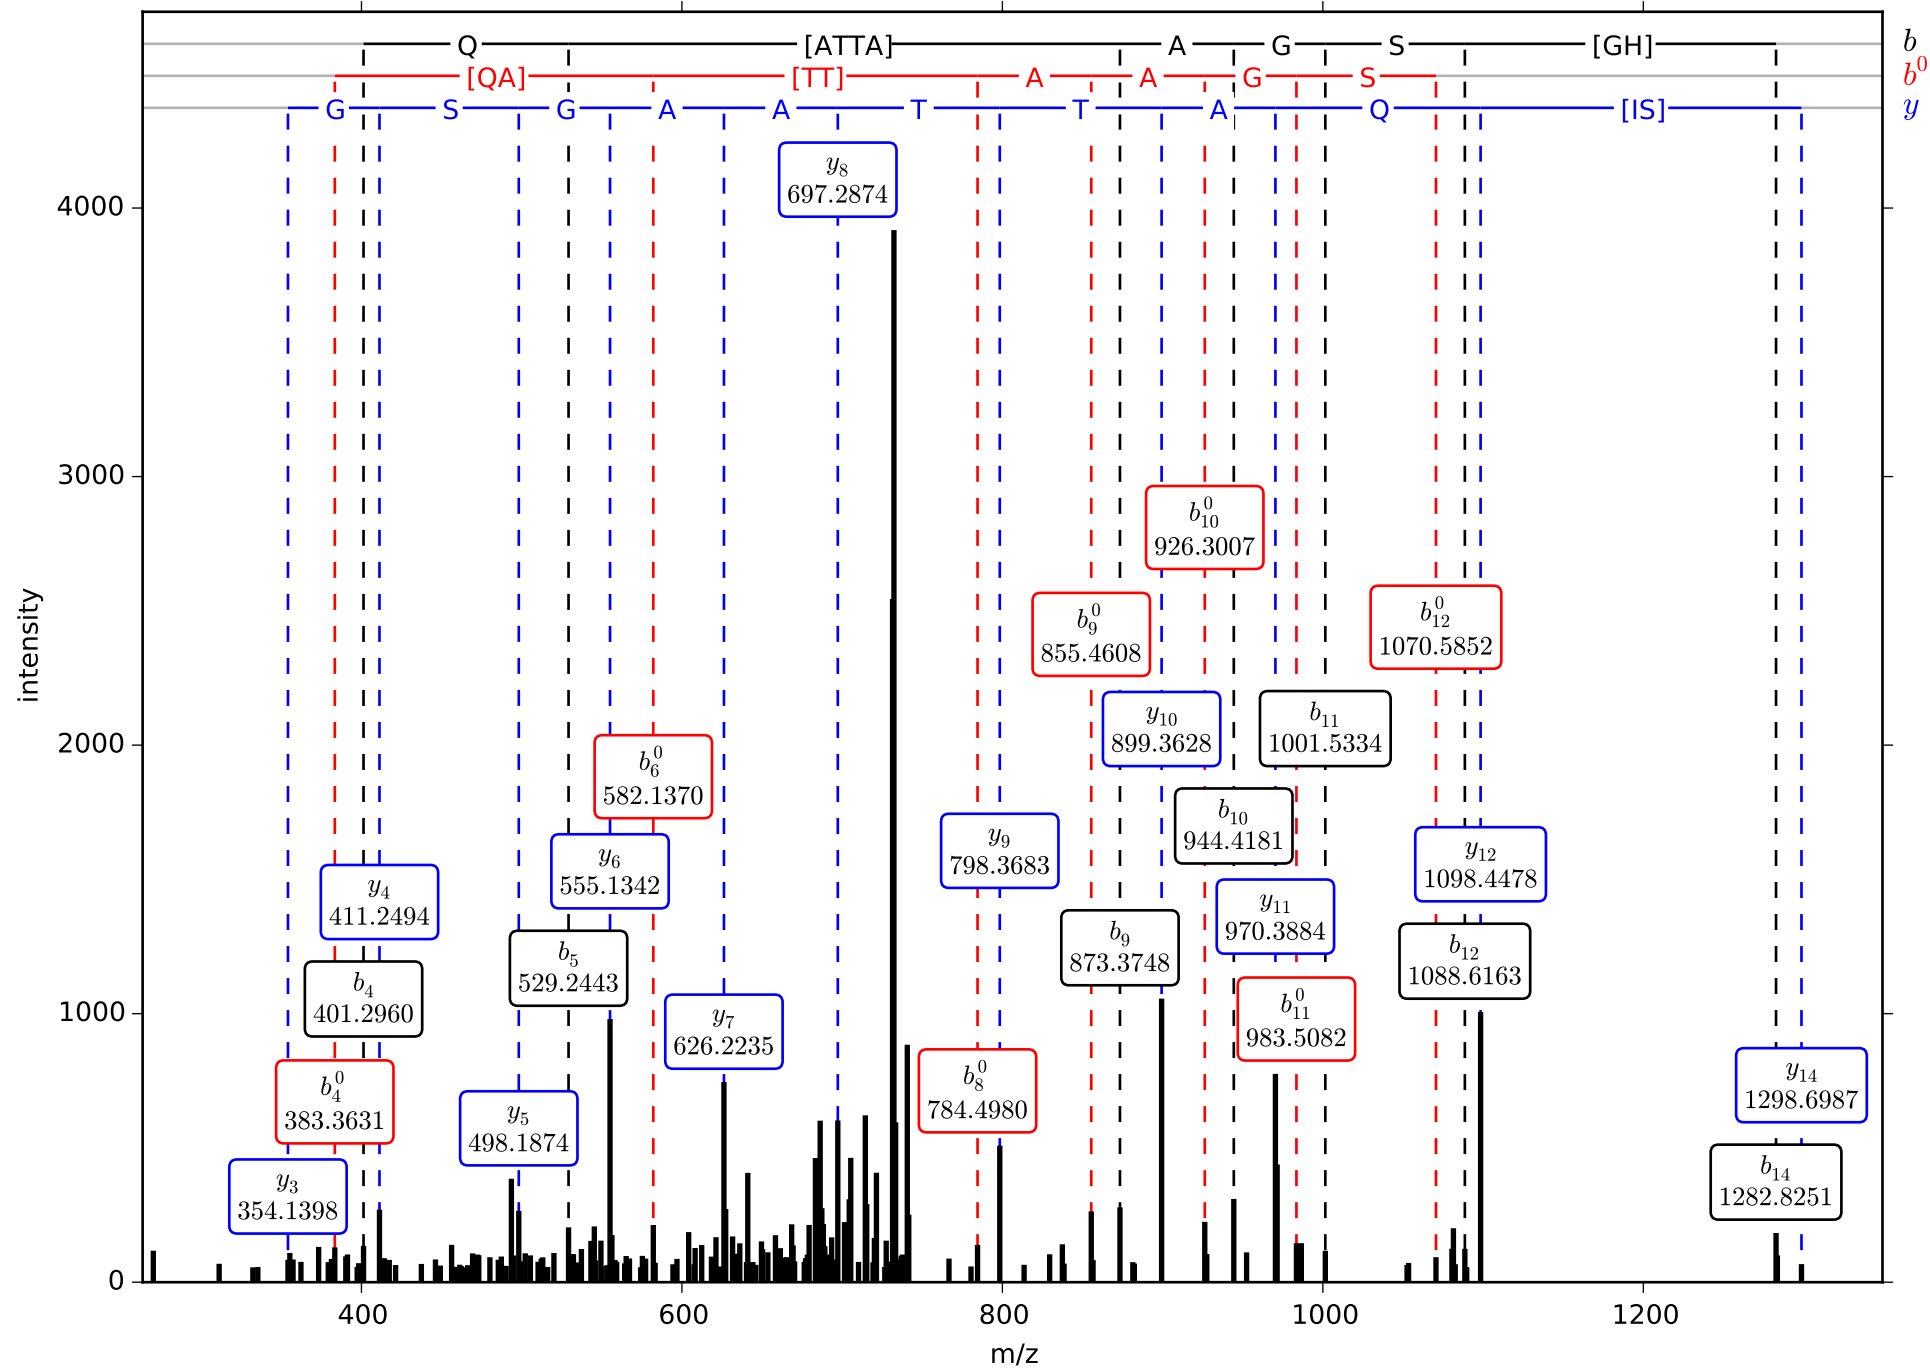

DYTRPDLP SGDSQP SLDQT

parent: 1046.480713,2+

MSGFScore: 86

QValue: 0.00747597

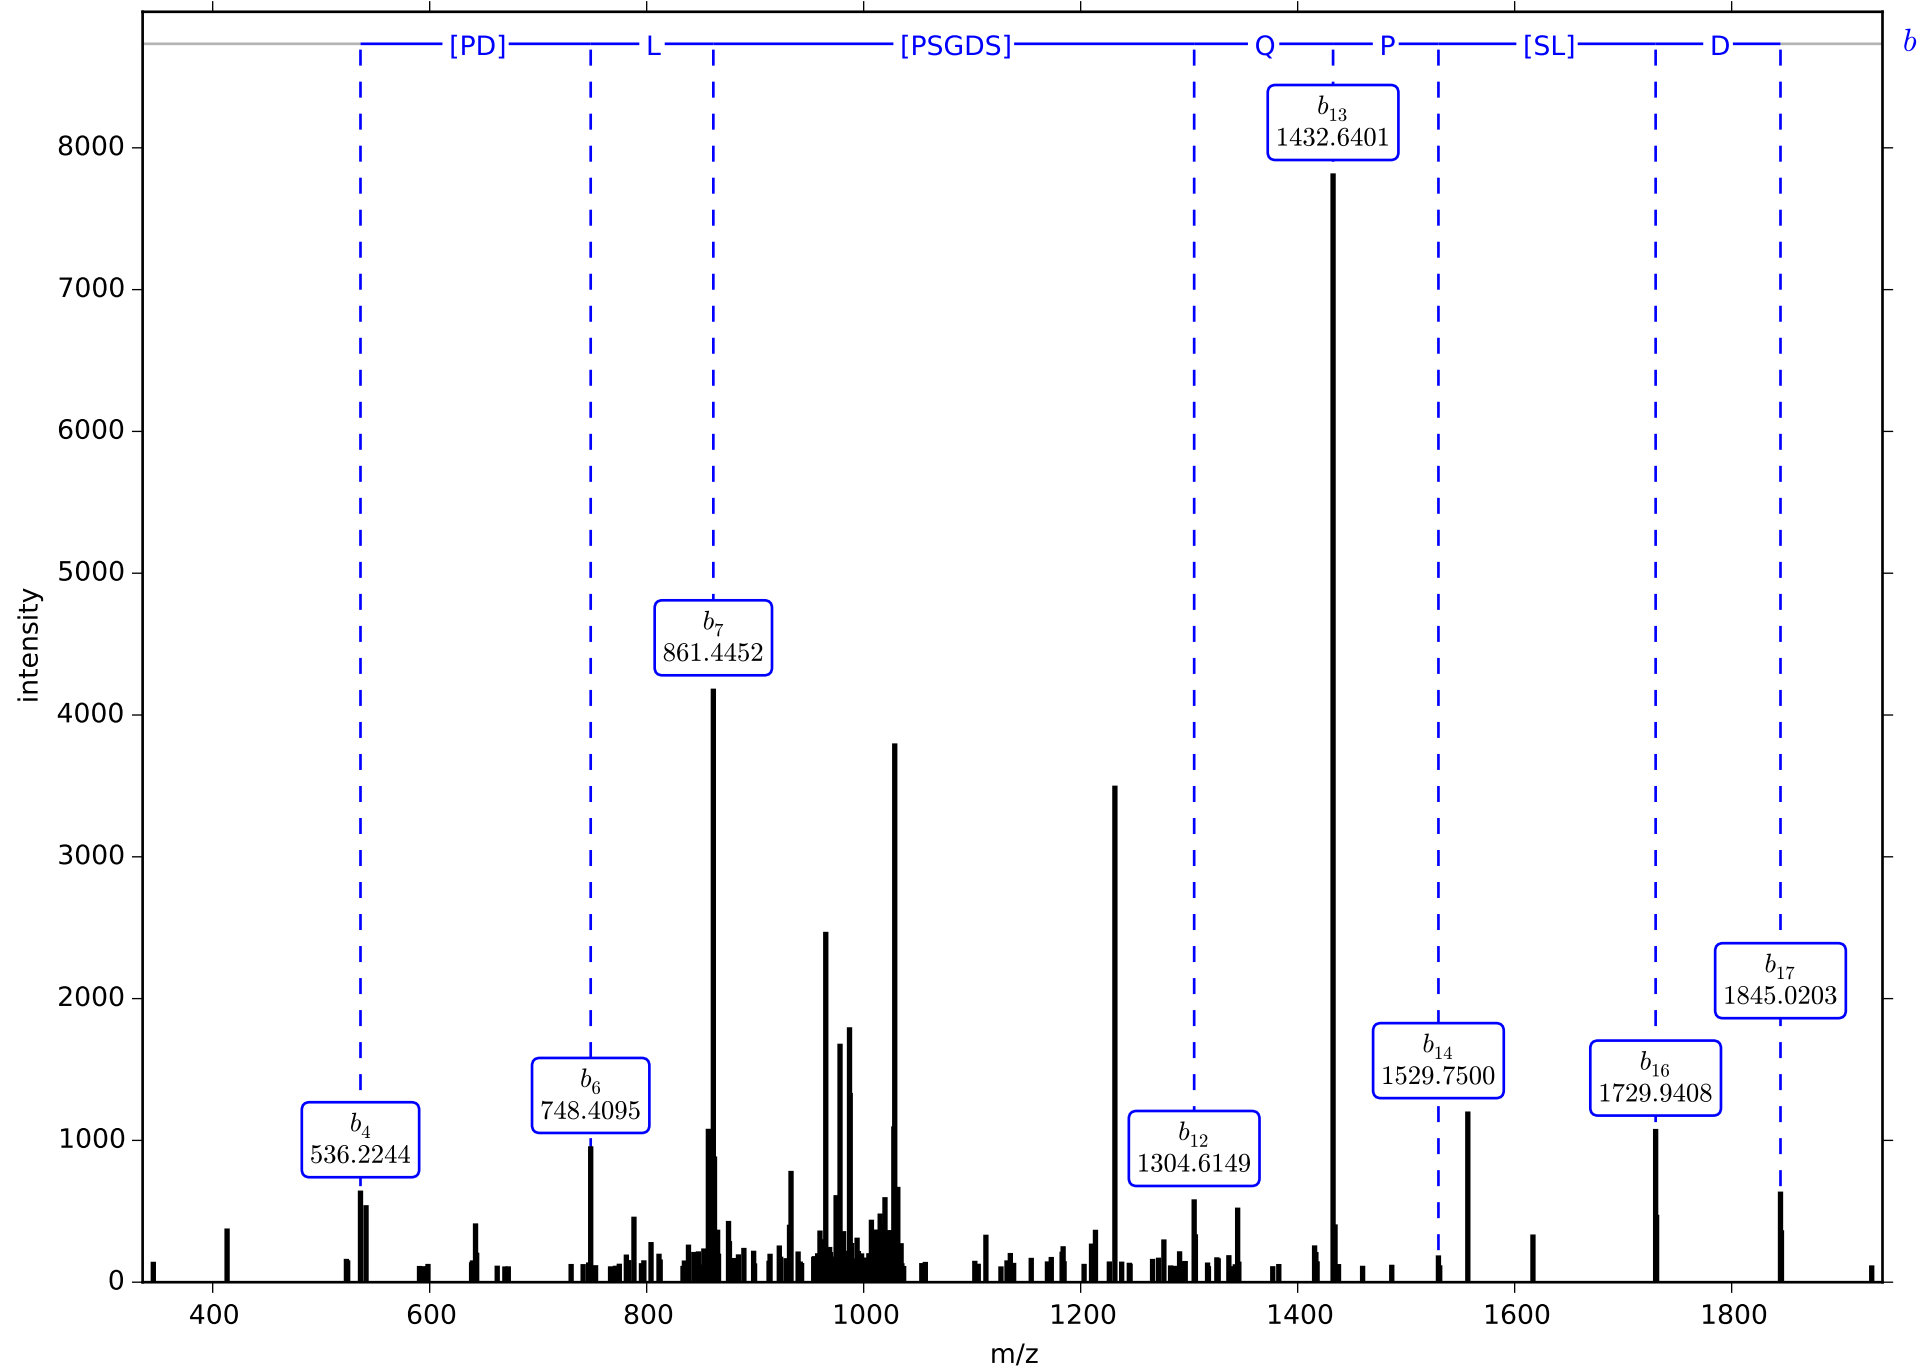

VETGVLKPGMVV

parent: 614.849060,2+

MSGFScore: 90

QValue: 0

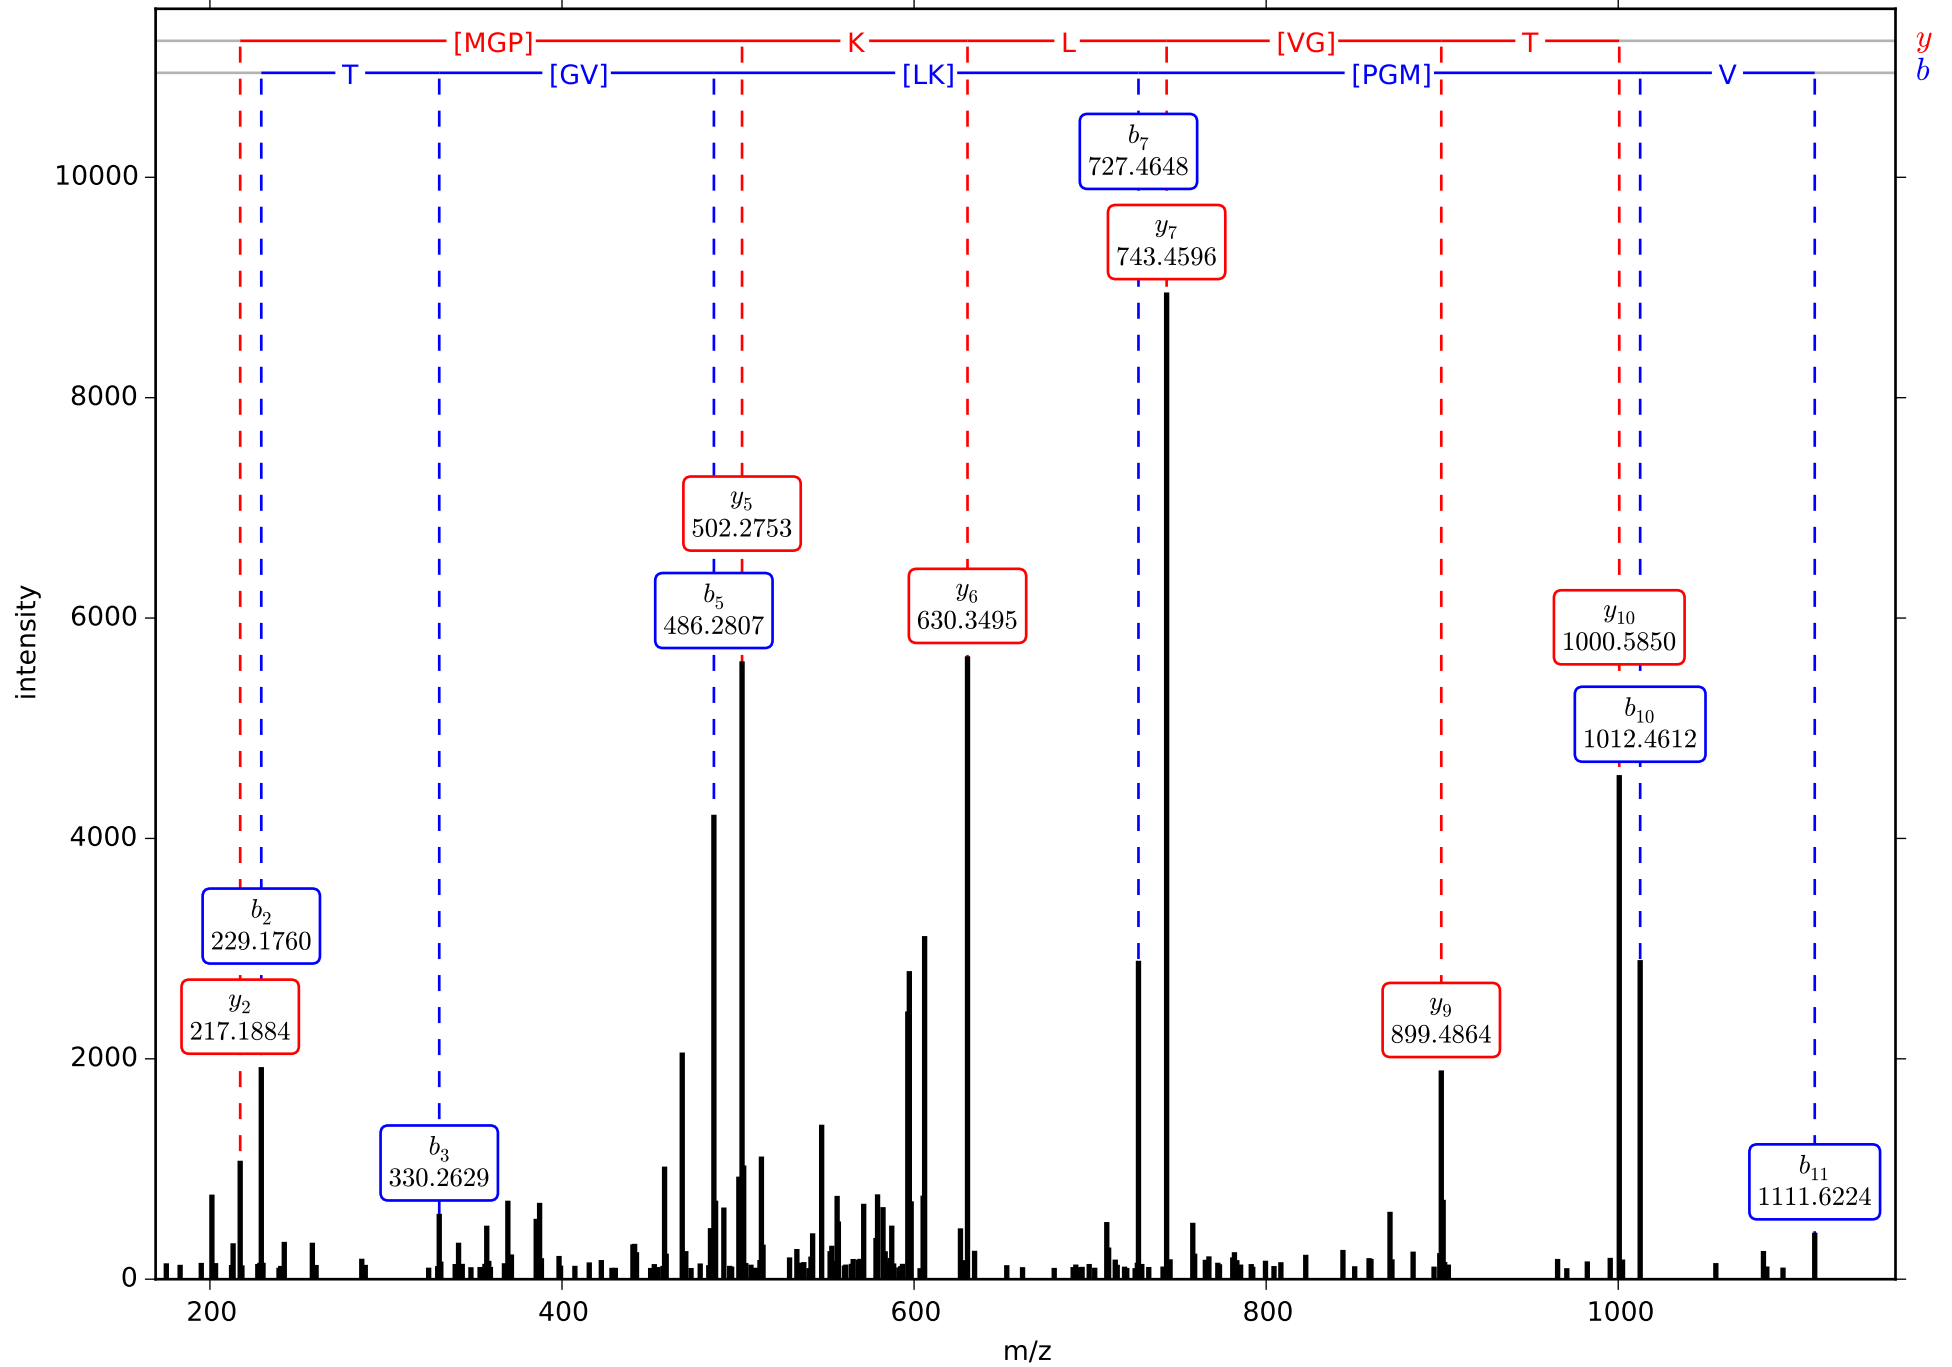

VTIAQGGVLPNIQAV

parent: 493.955688,3+

MSGFScore: 98

QValue: 0

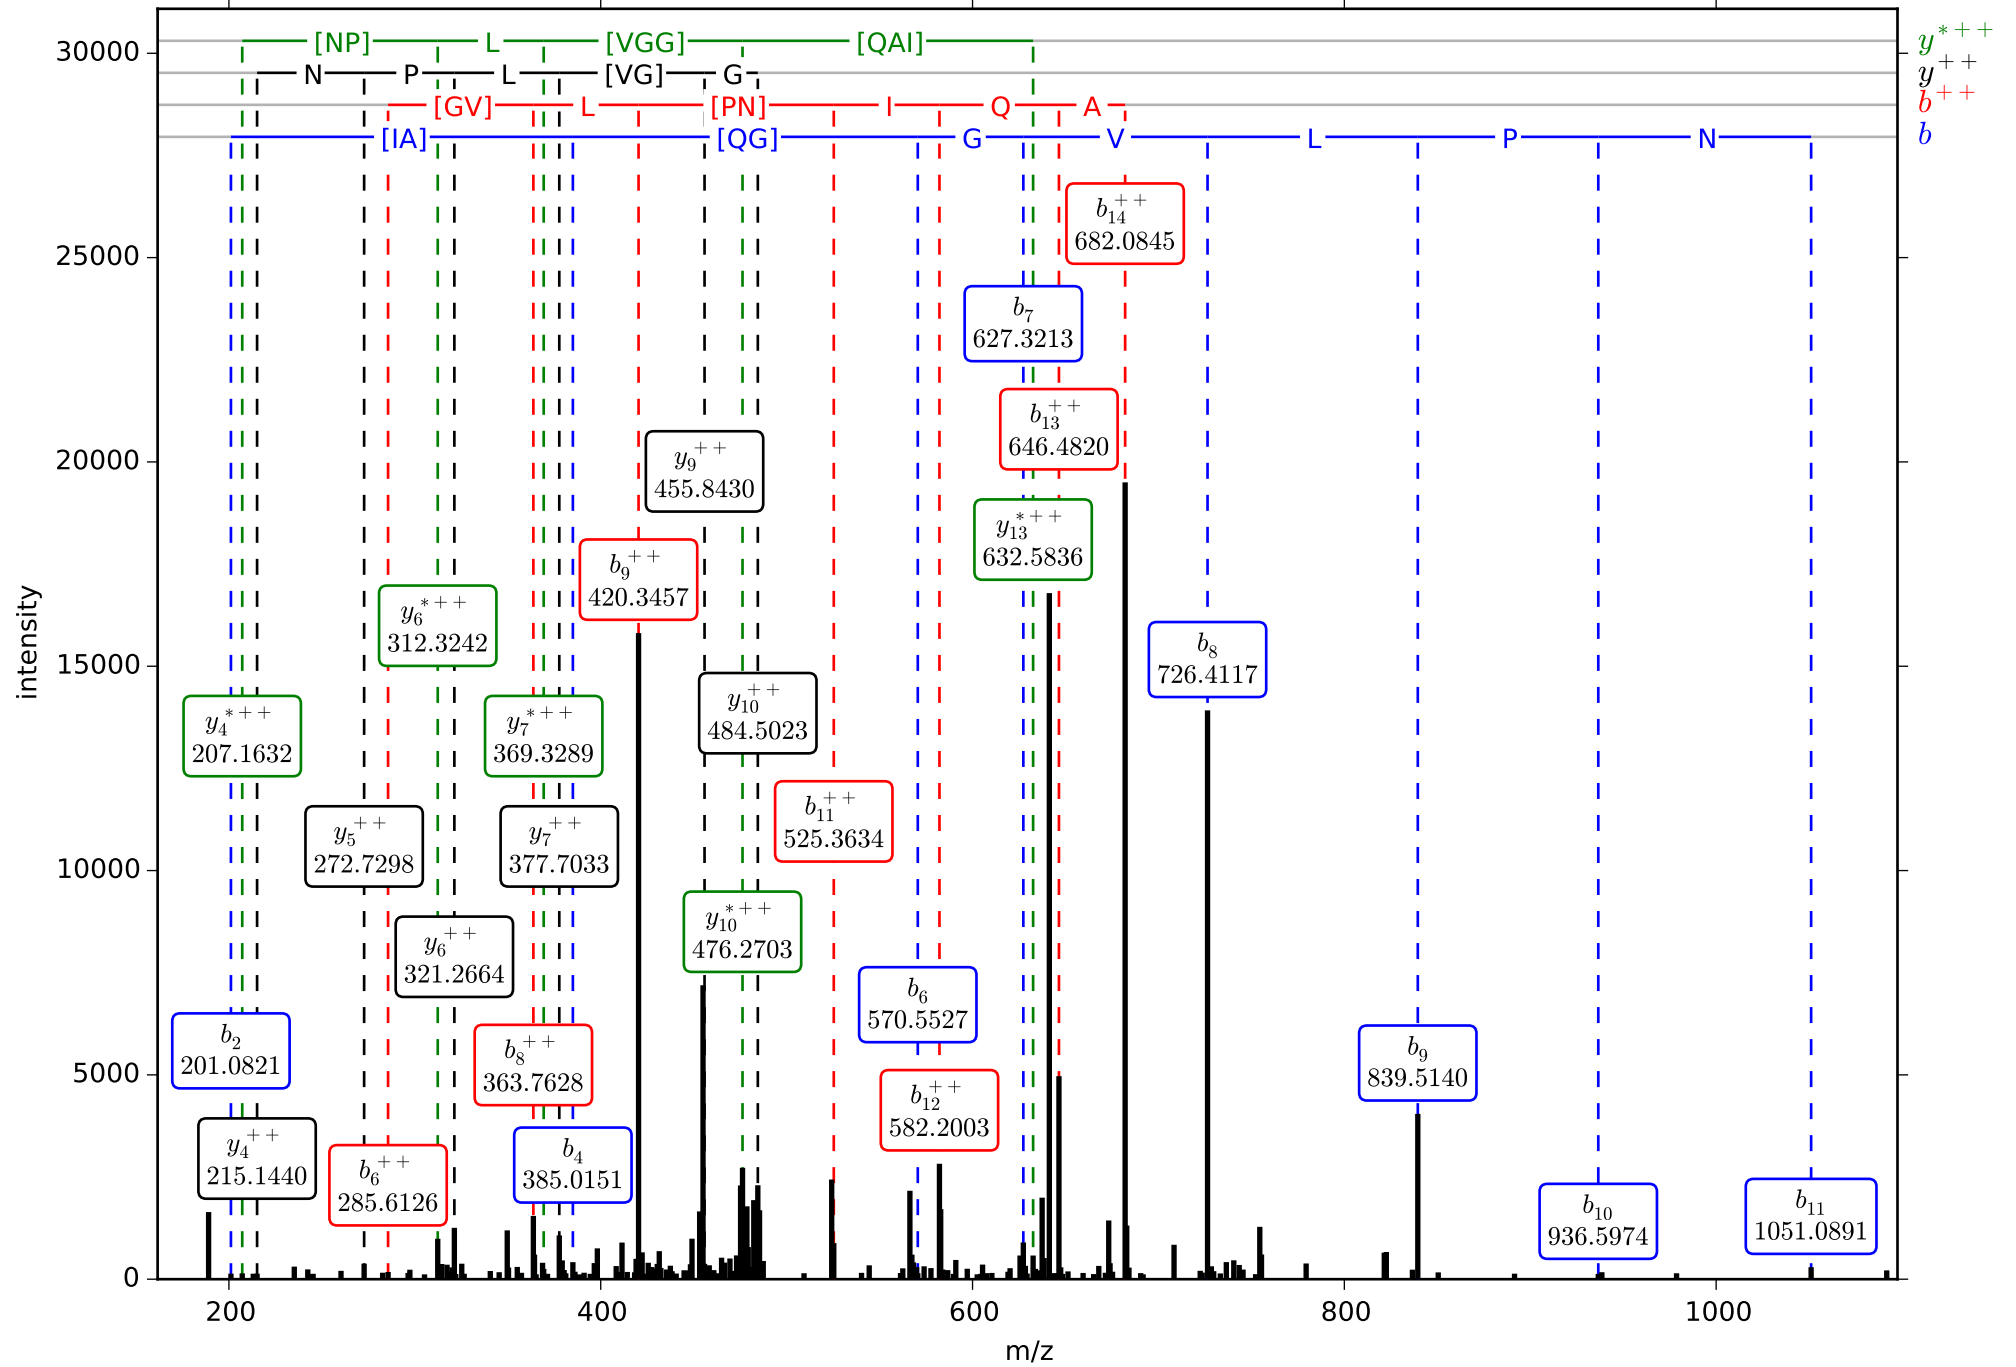

VETGVLKPGMVVTFAPVNV

parent: 979.049958,2+

MSGFScore: 98

QValue: 0

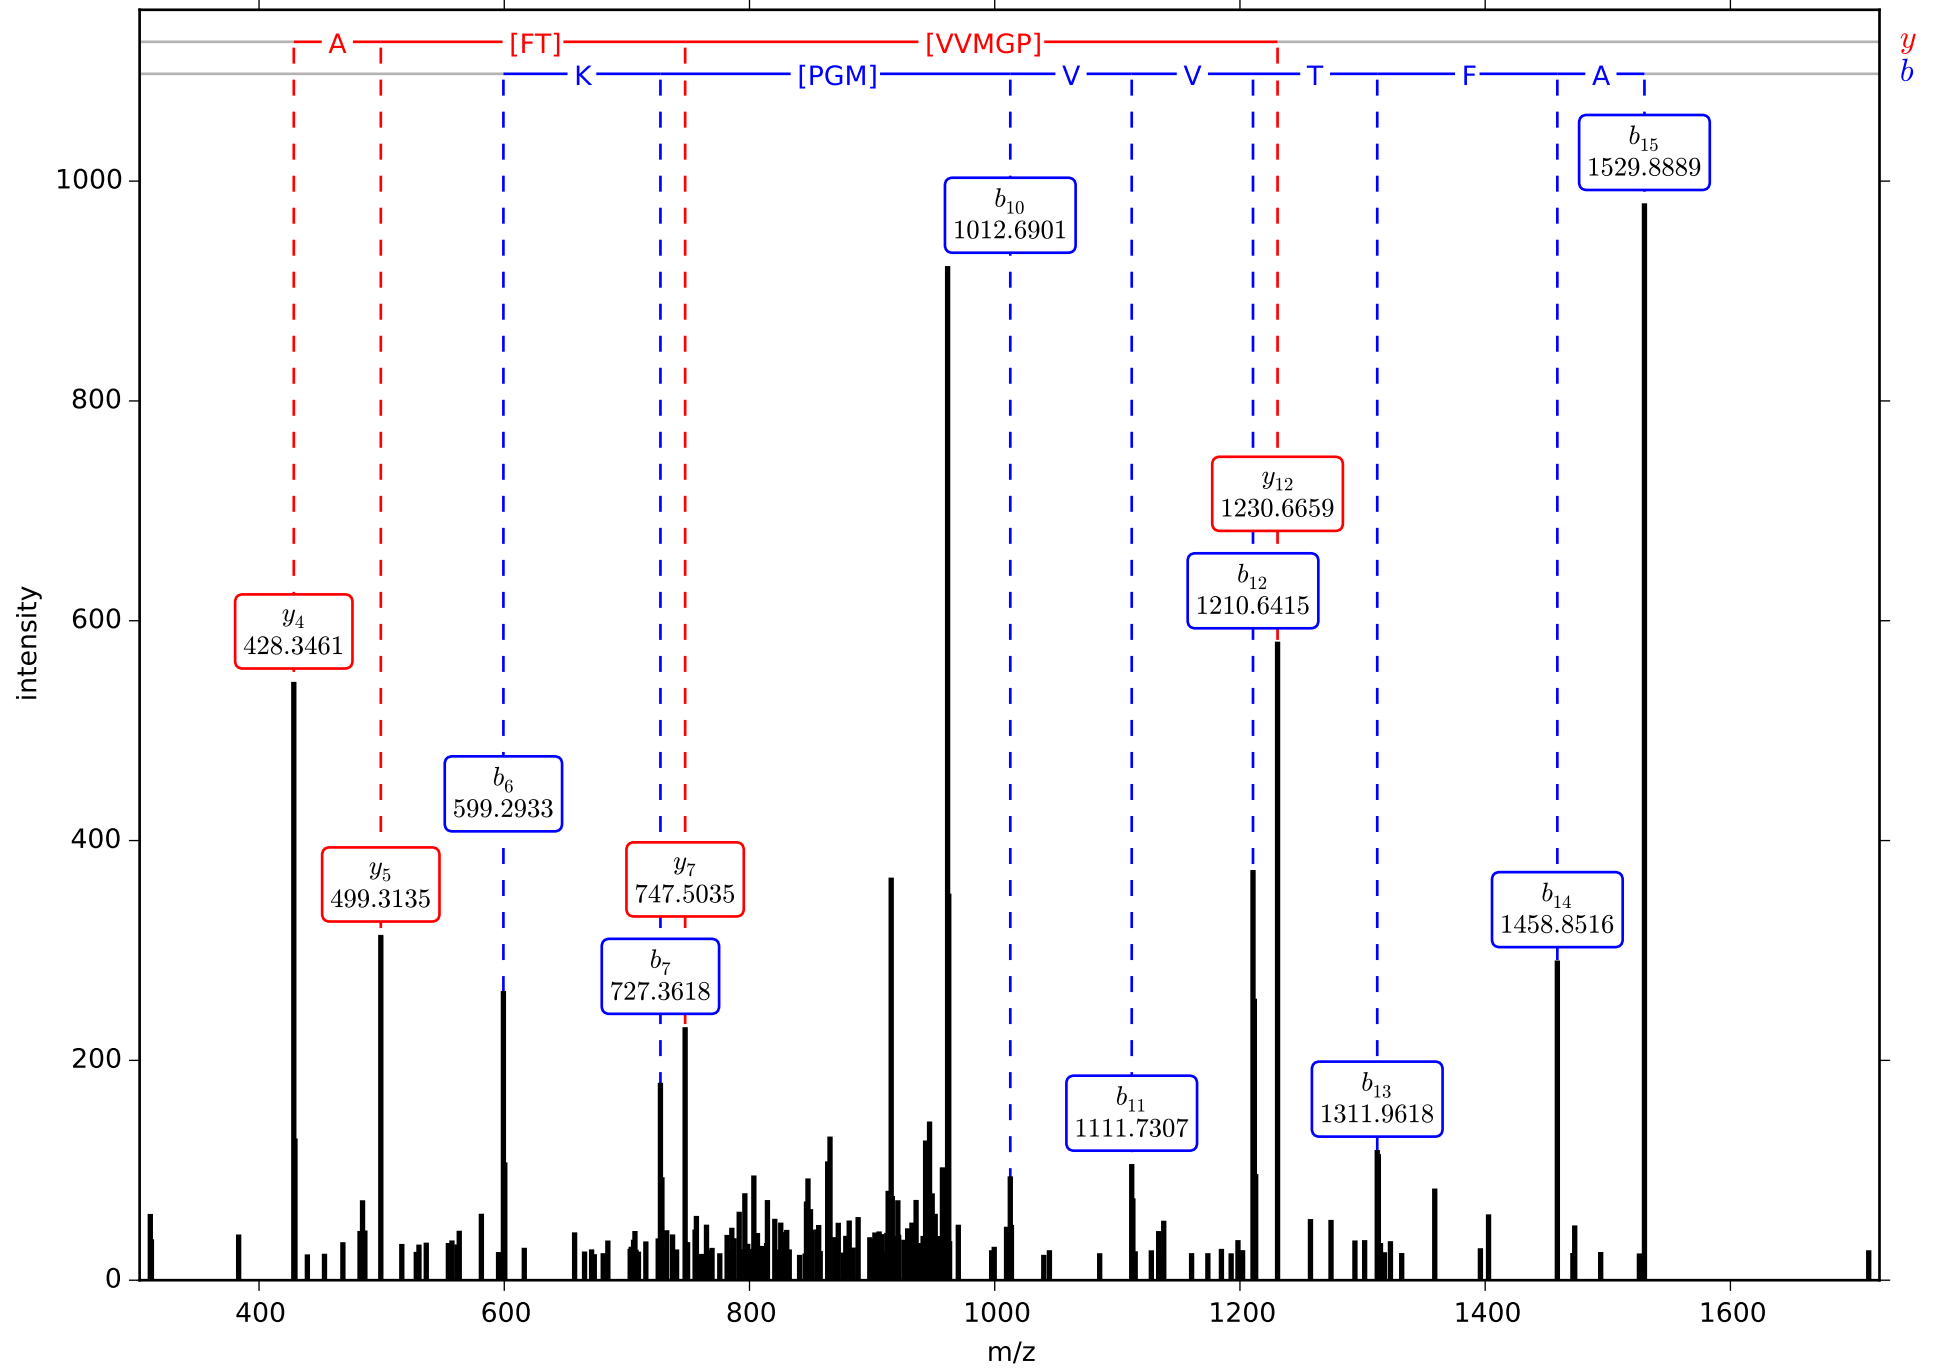

# SLLEGQEDHYNNLSA

parent: 845.394197,2+

MSGFScore: 104

QValue: 0.000860215

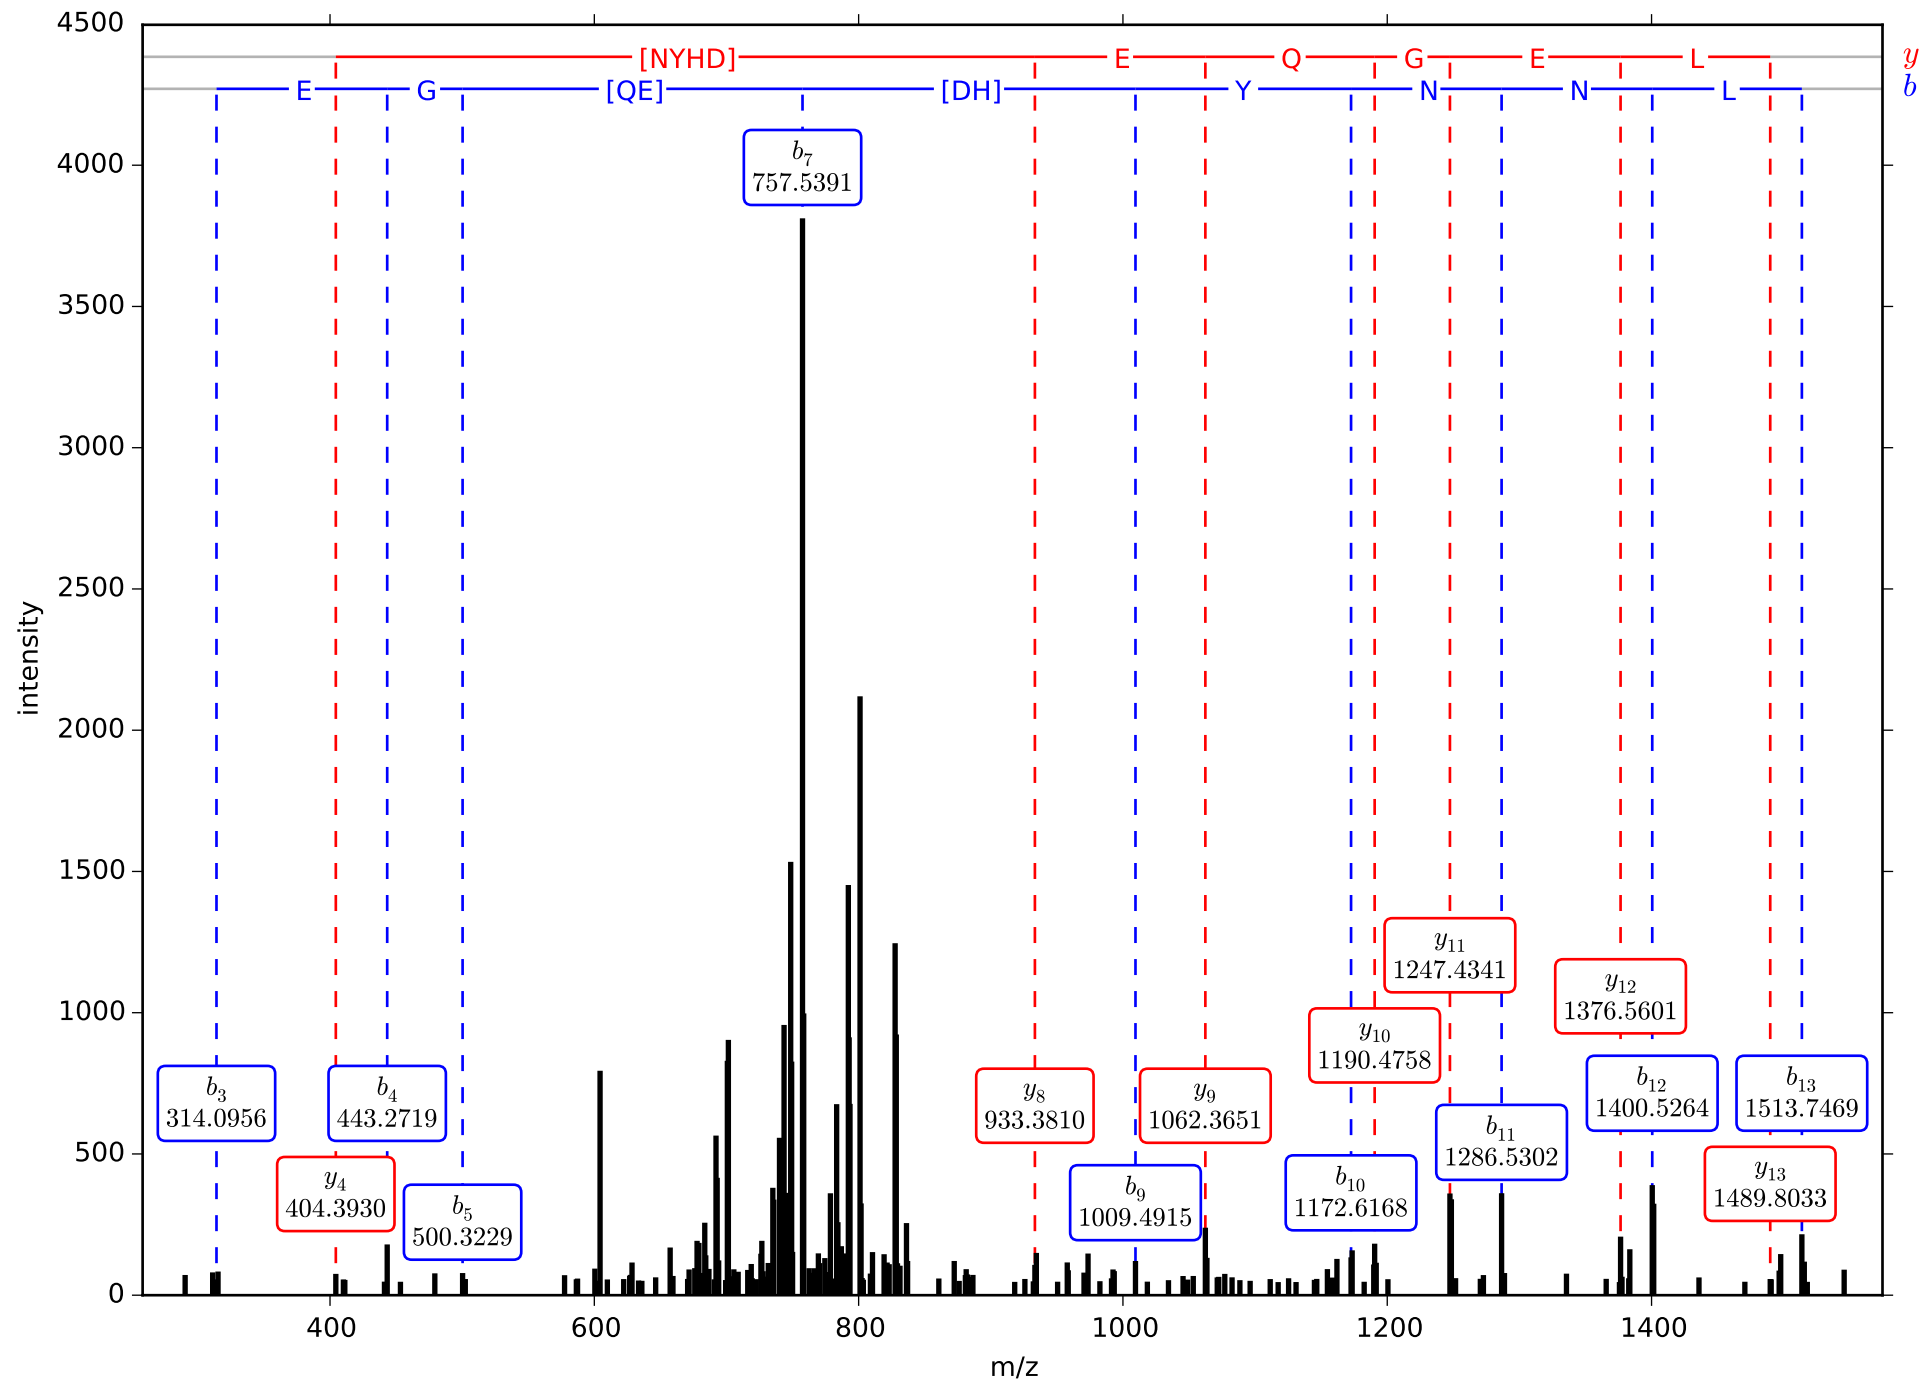

# TATESFASDPILYRPV

parent: 883.961640,2+

MSGFScore: 106

QValue: 0

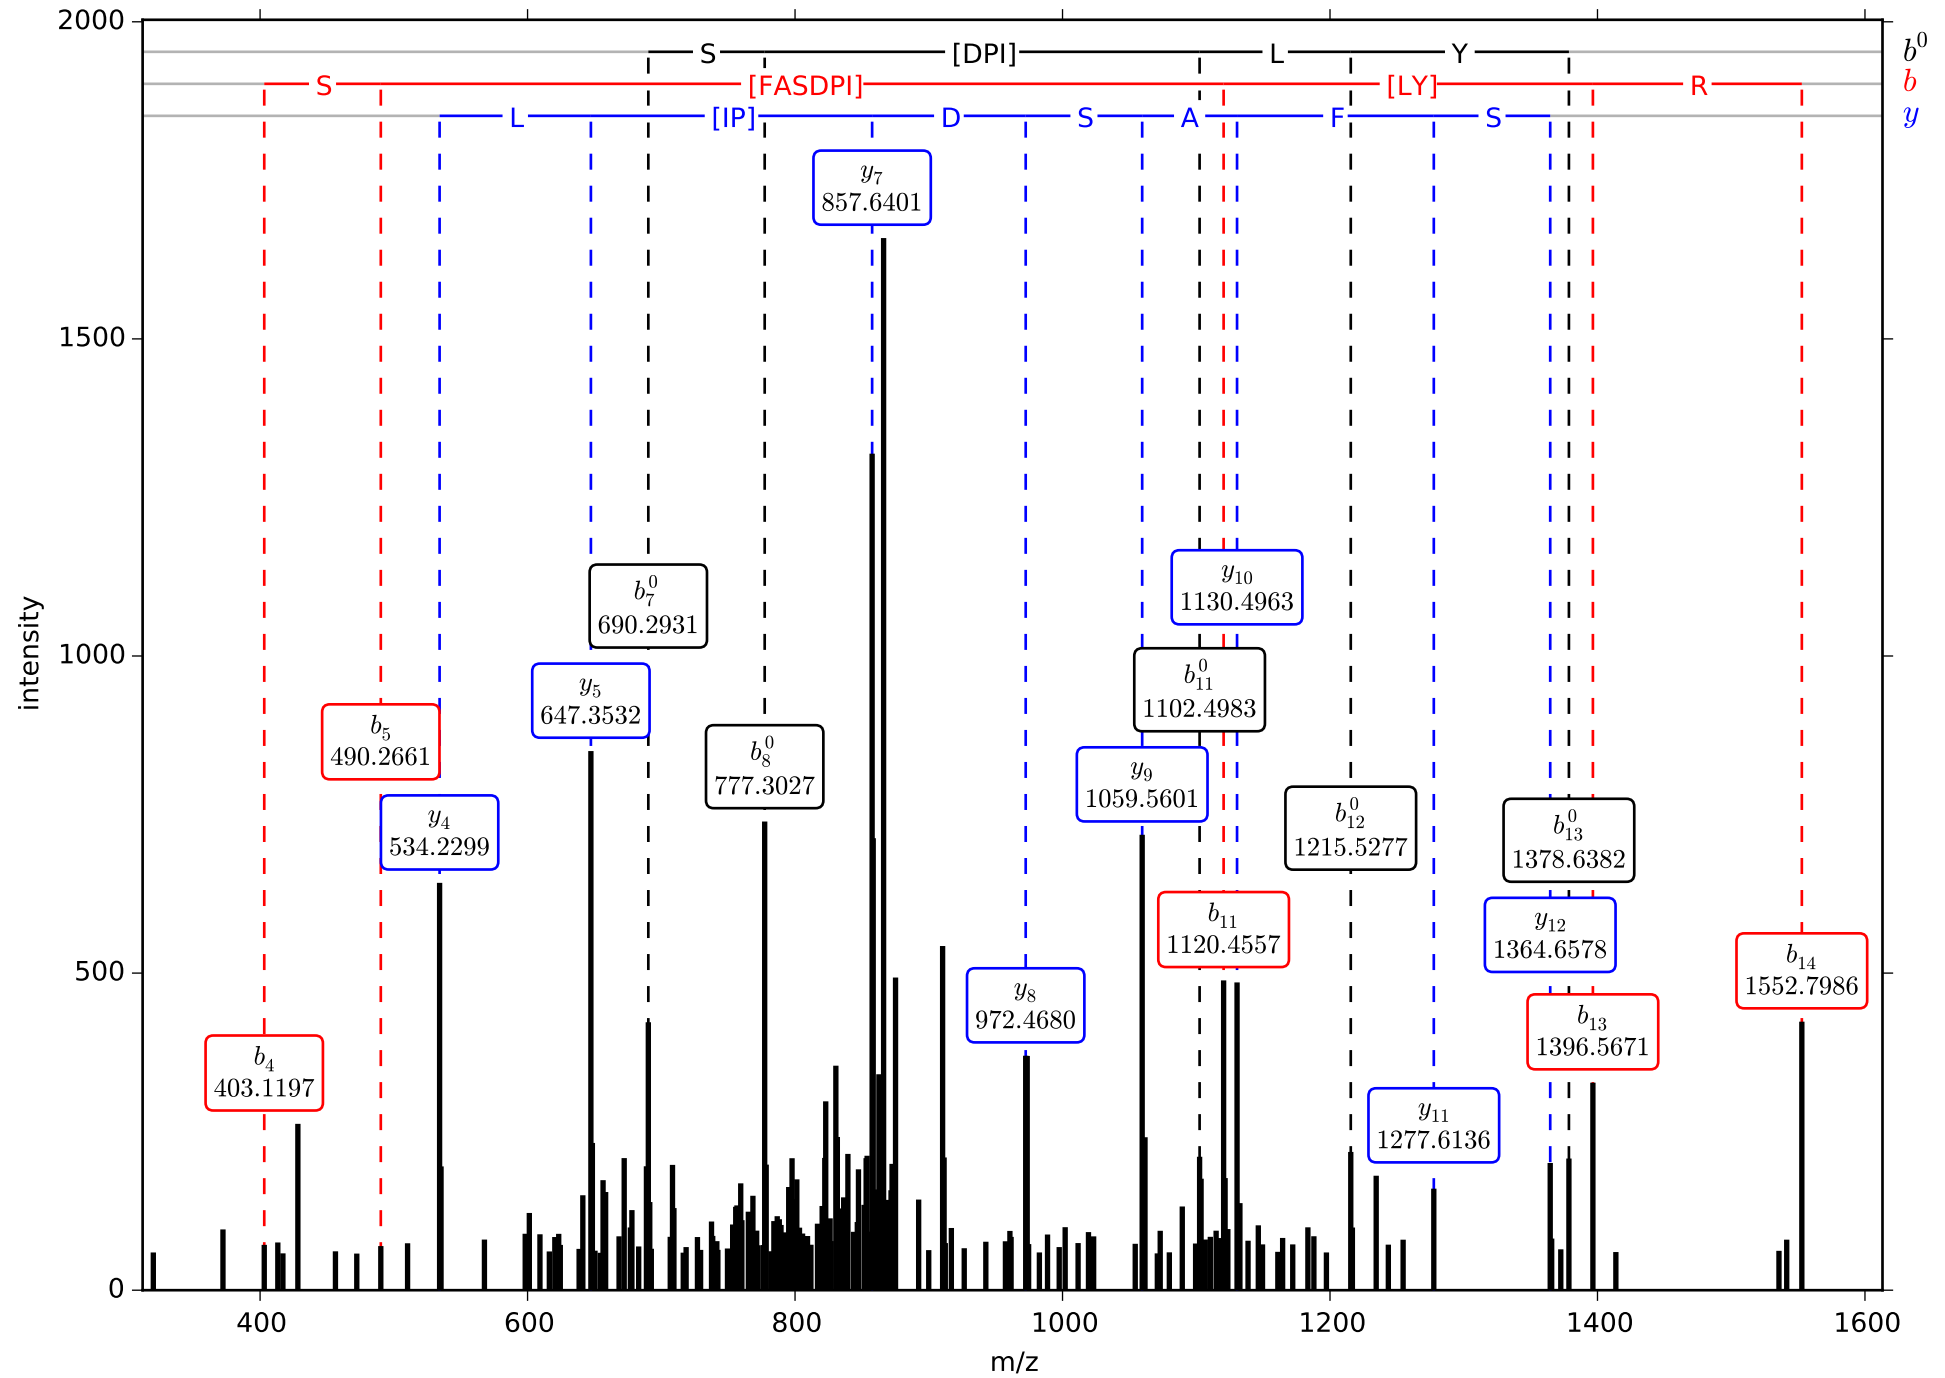

VTIAQGGVLPNIQA

parent: 690.893799,2+

MSGFScore: 109

QValue: 0

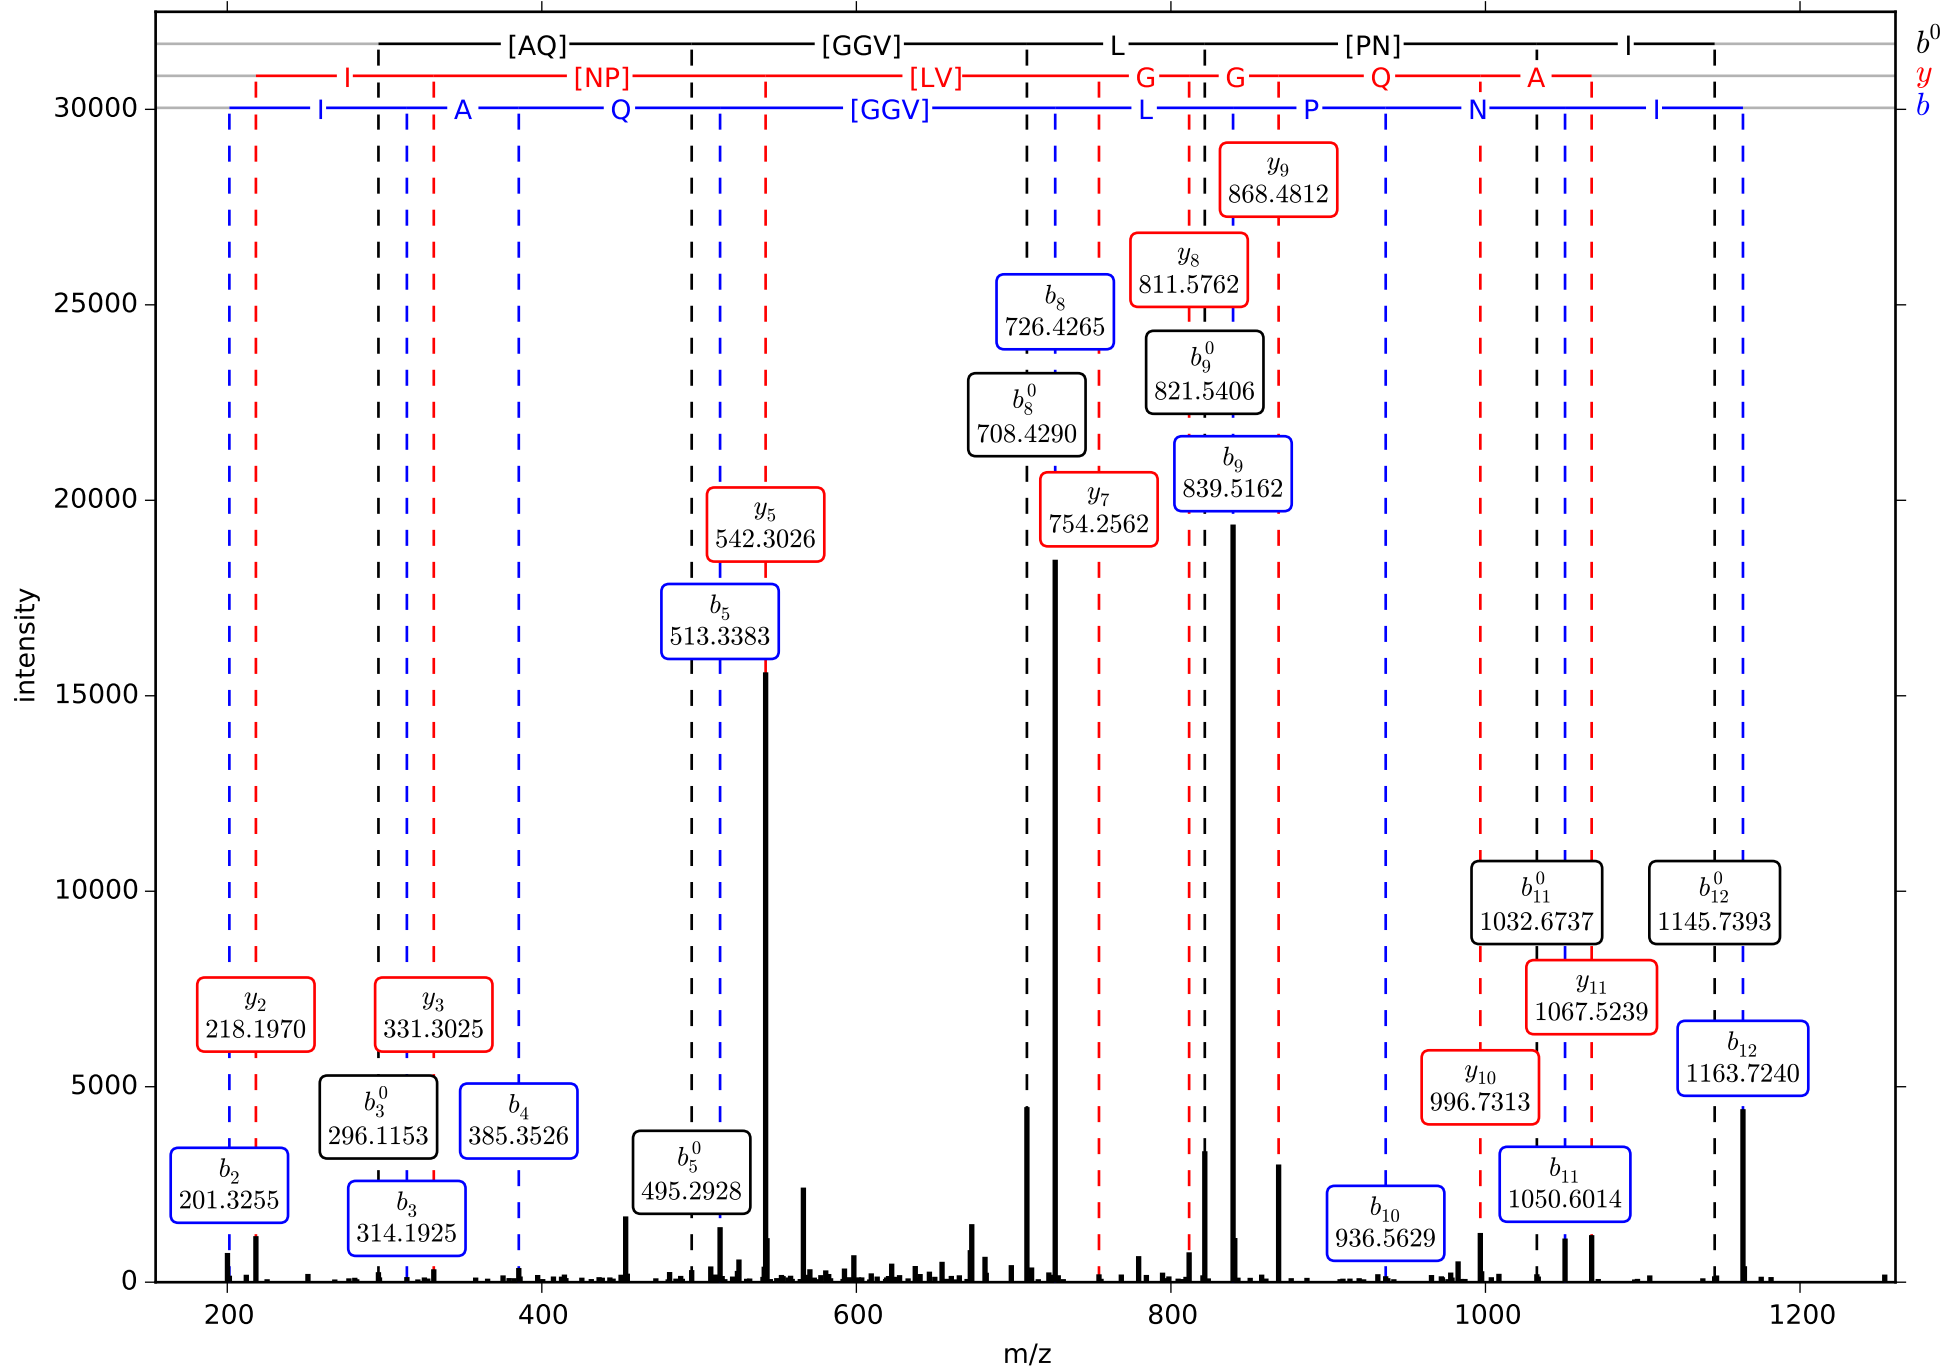



SINPDEAVAYGAAVQAA

parent: 823.901550,2+

MSGFScore: 112

QValue: 0

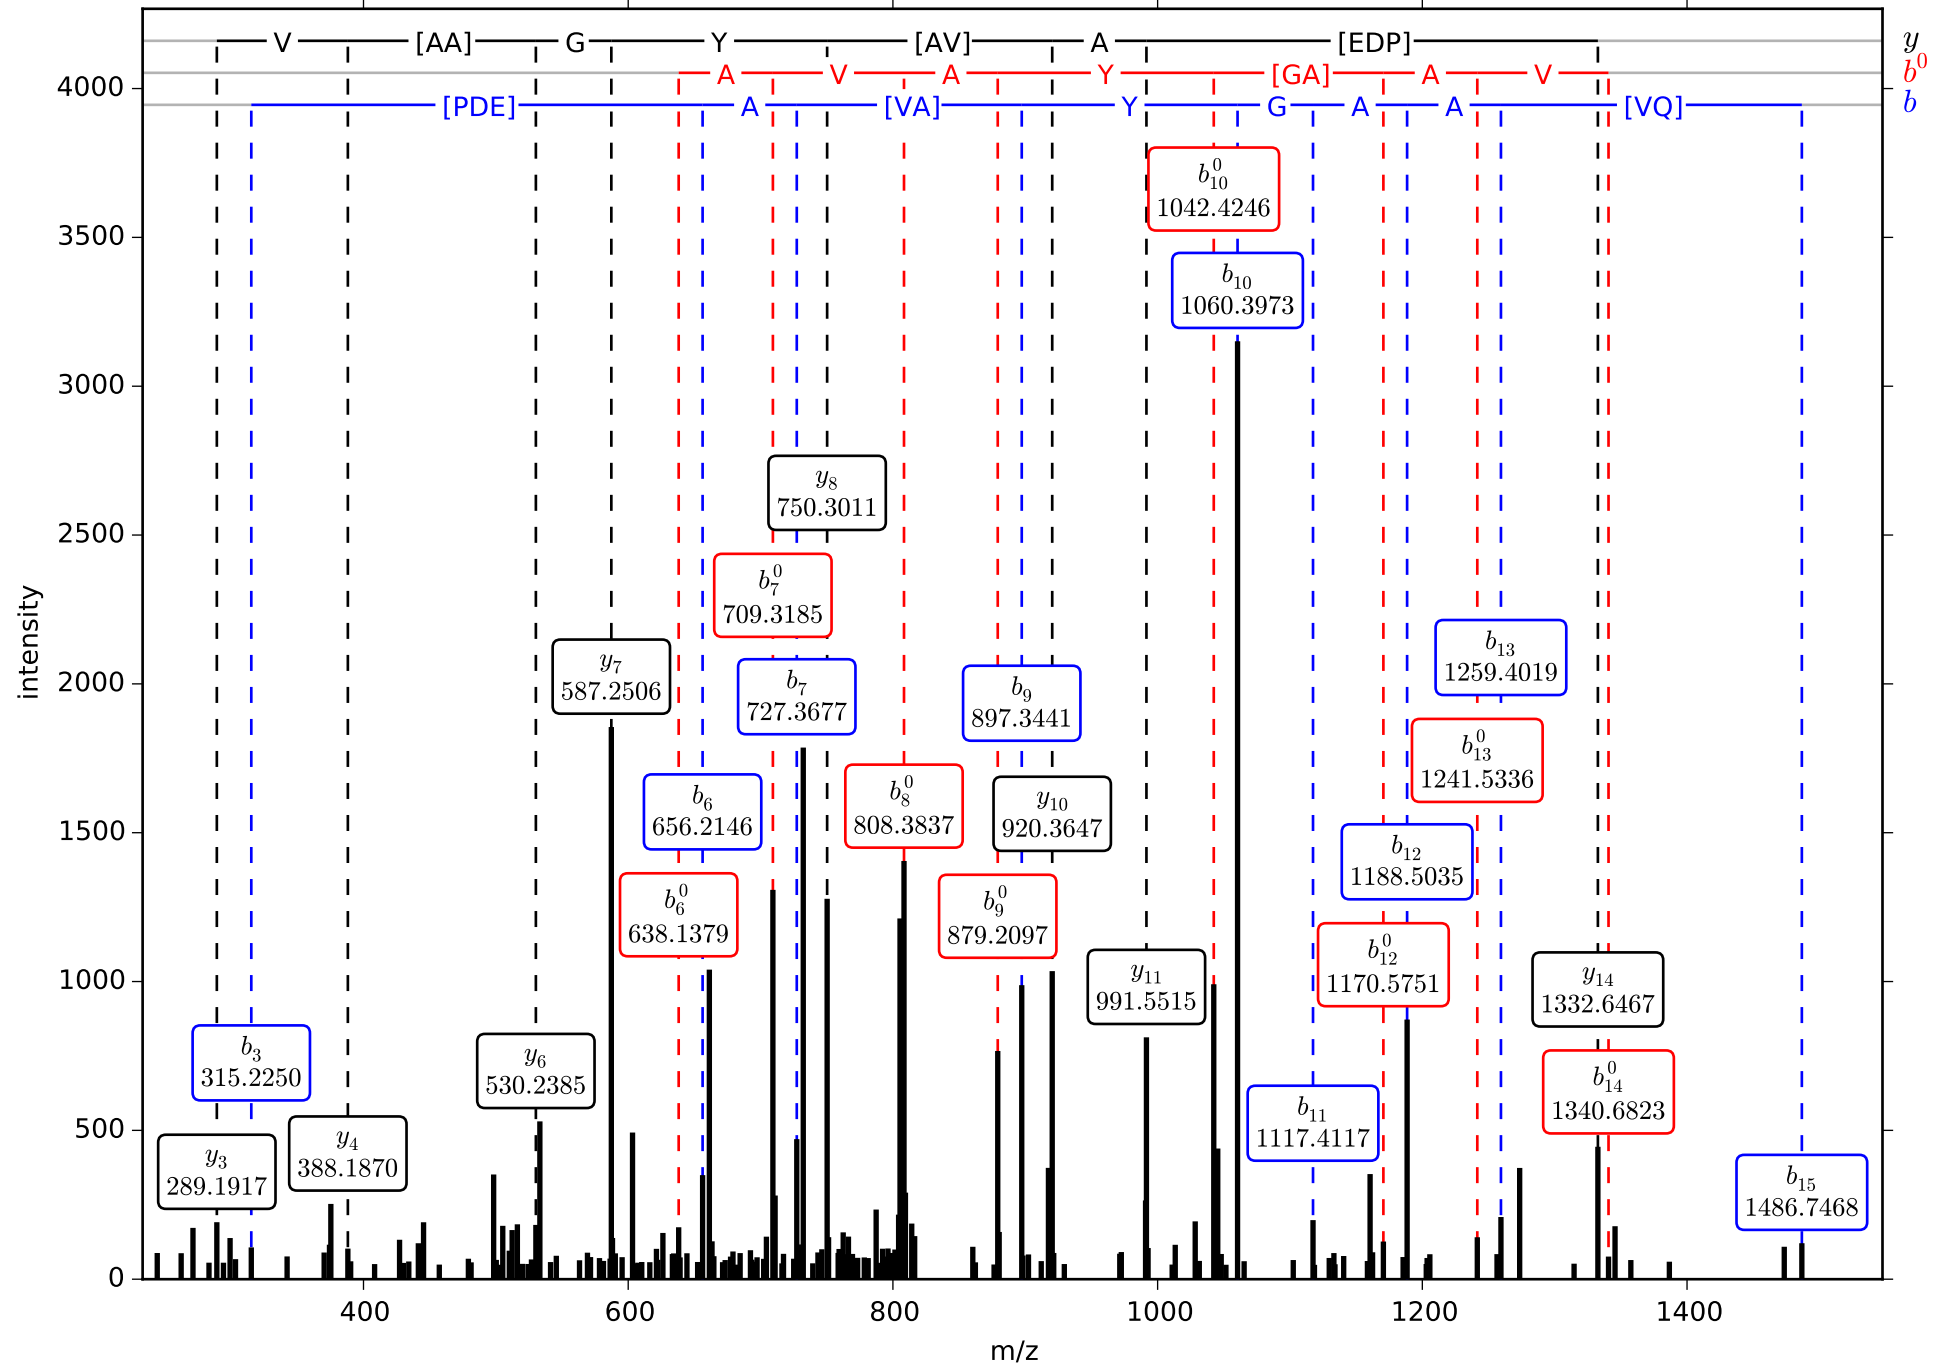

# KDDPLTNLNTAFDV

parent: 781.883423,2+

MSGFScore: 132

QValue: 0

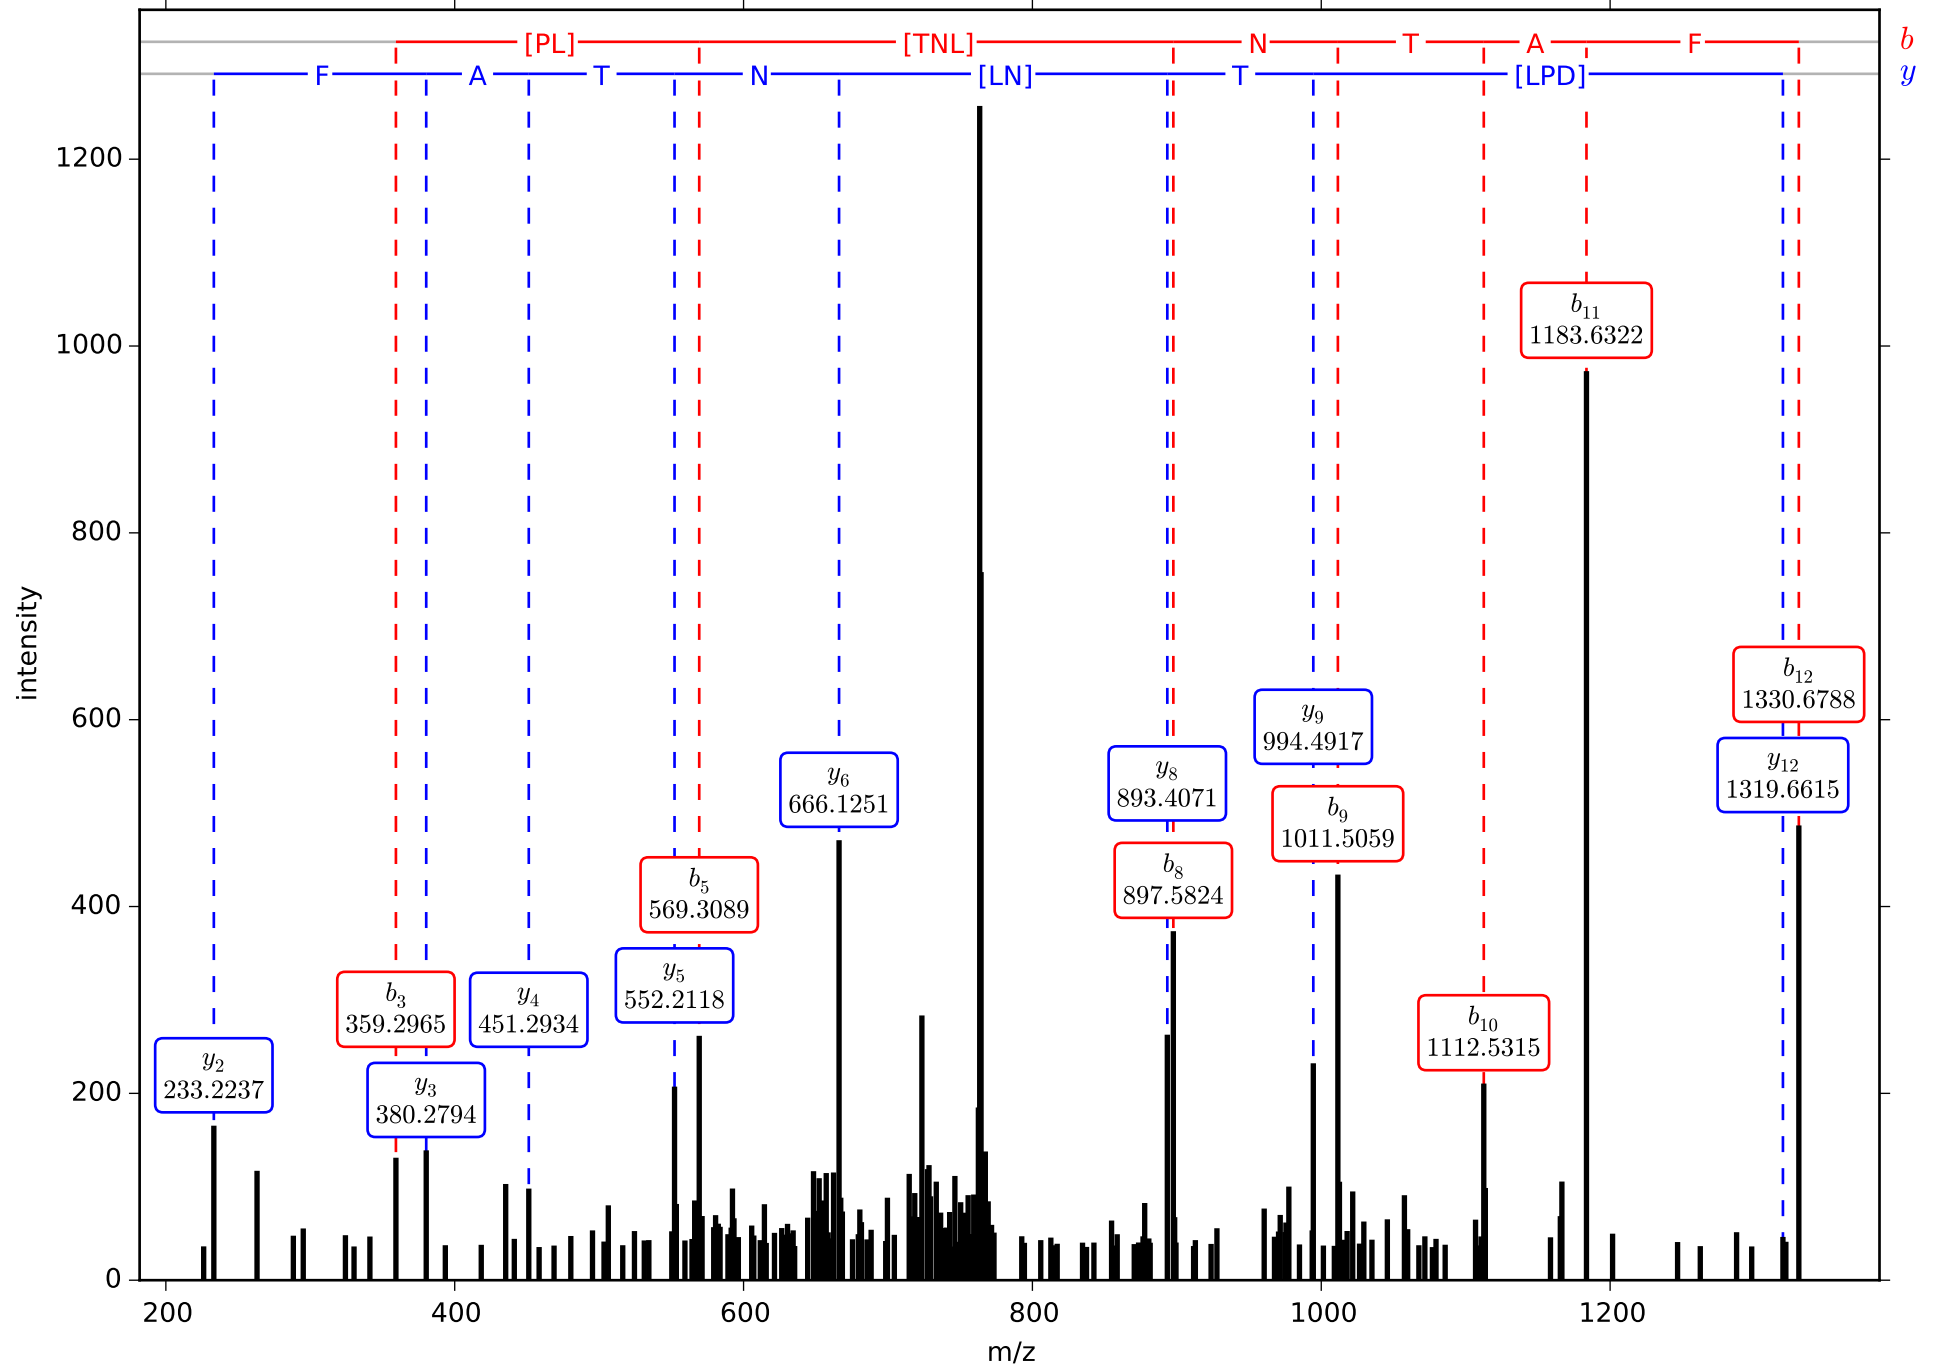

TTSGYAGGLSSAYGGLT

parent: 781.867432,2+

MSGFScore: 134

QValue: 0

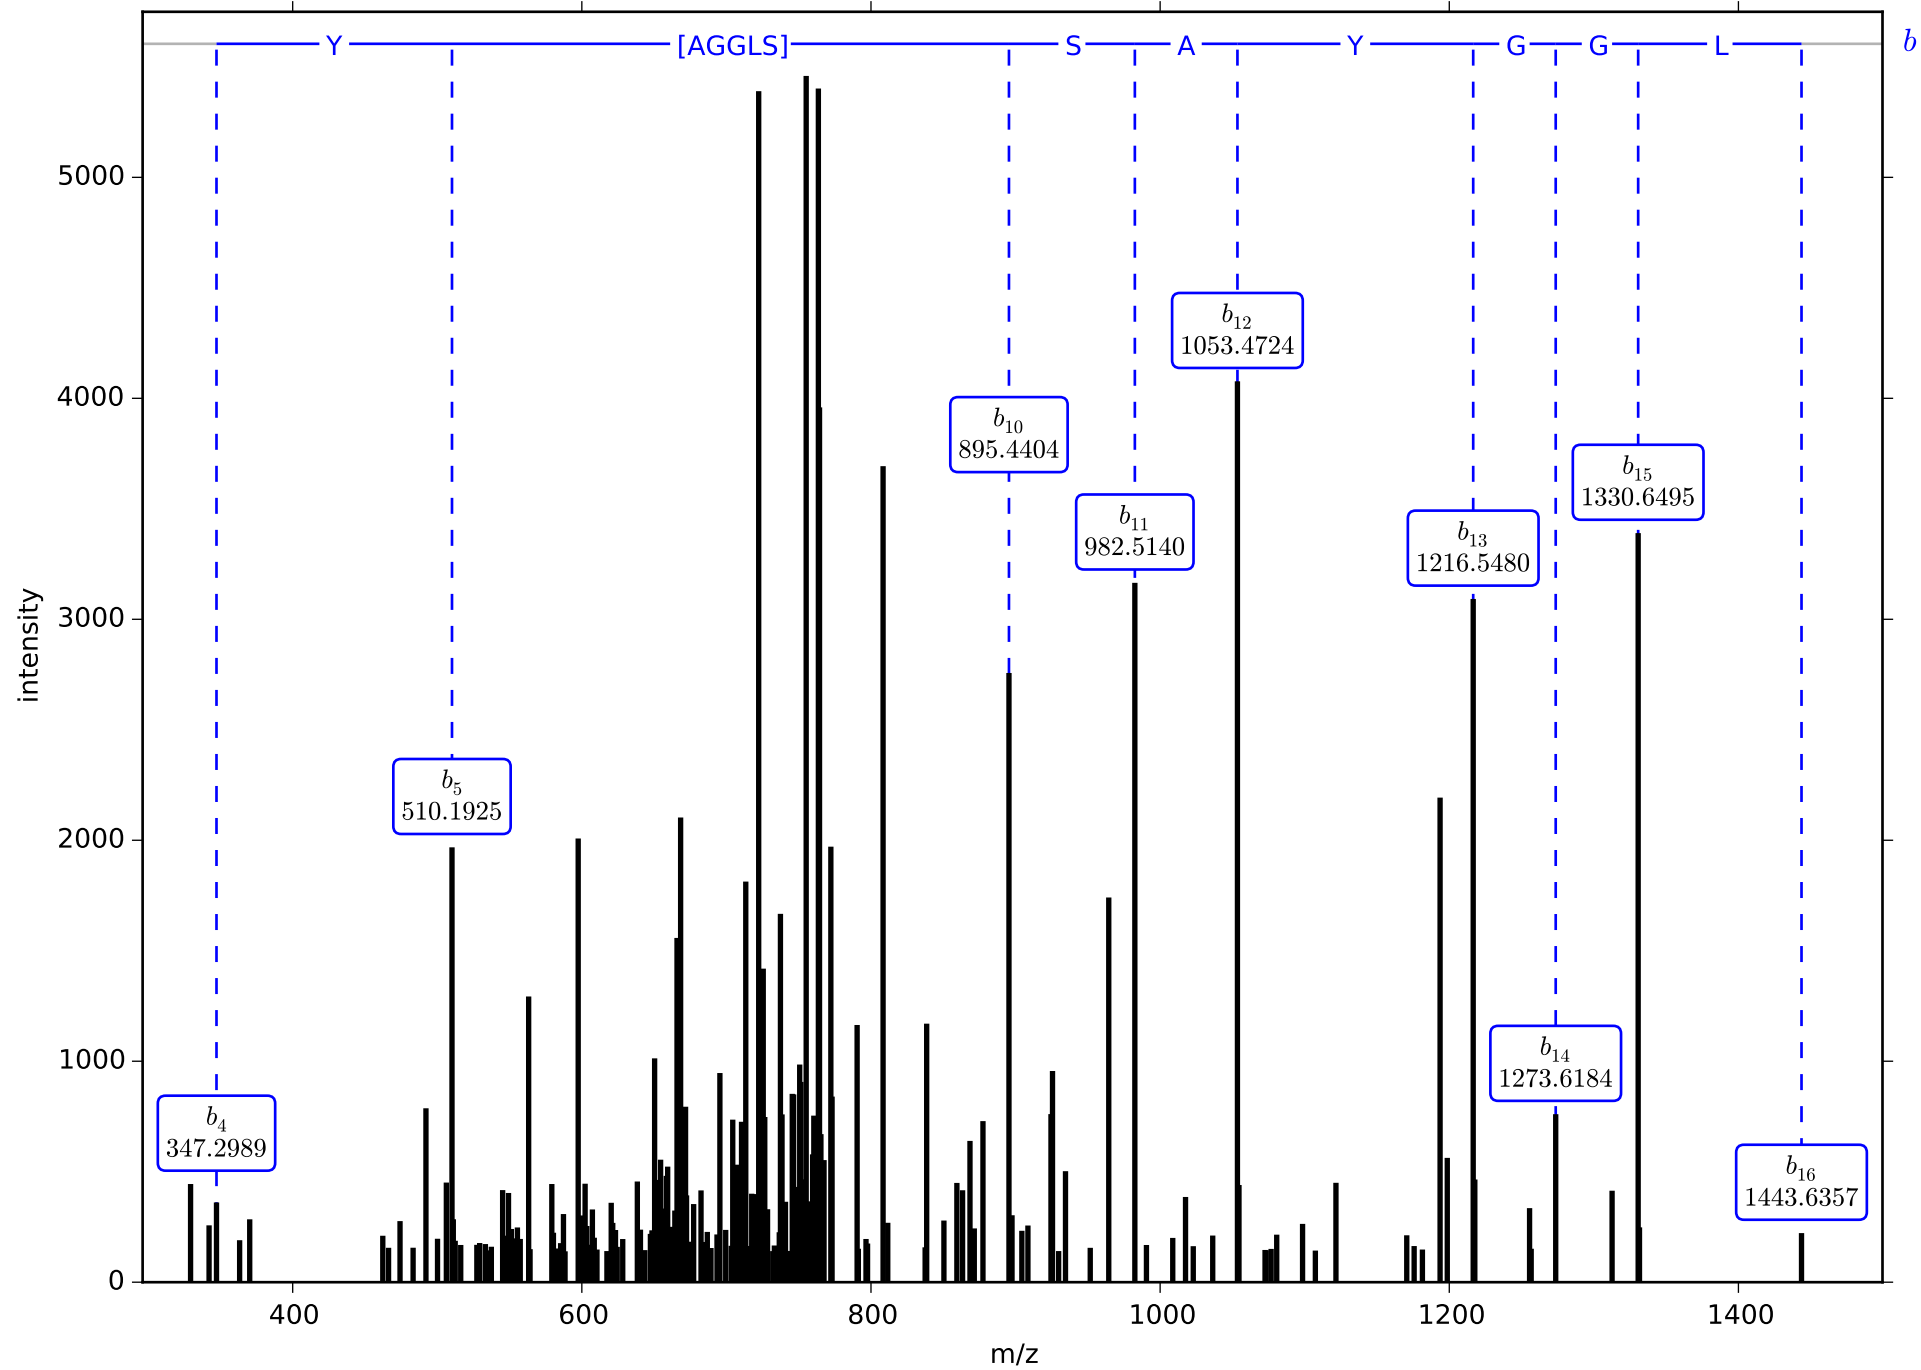

# TATESFASDPILYRPVAV

parent: 969.011079,2+

MSGFScore: 135

QValue: 0

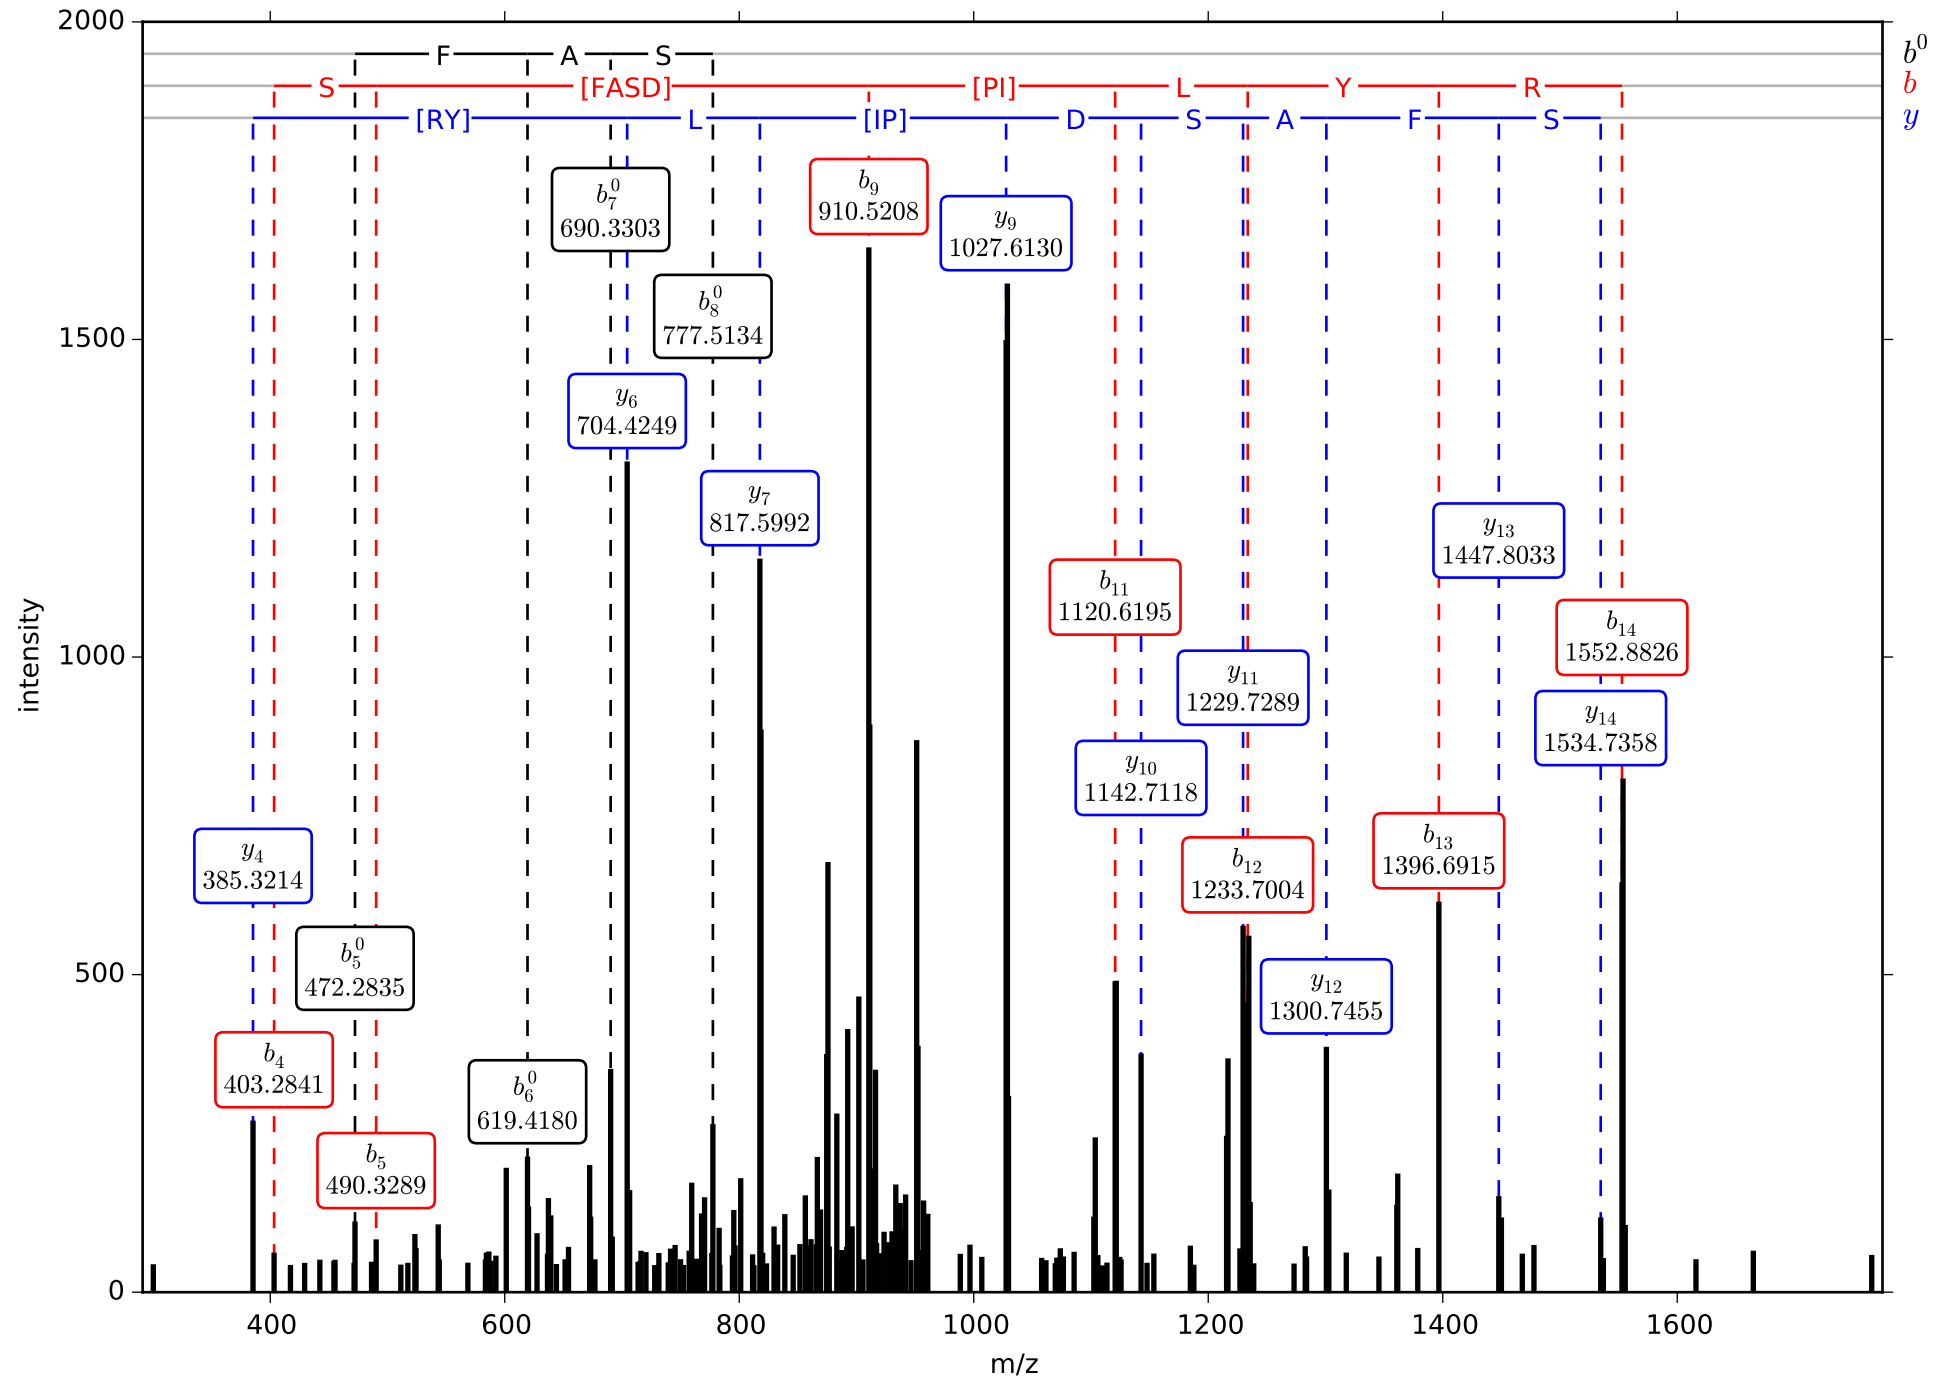

LLGGVTIAQGGVLPNIQAV

parent: 607.358969,3+

MSGFScore: 144

QValue: 0

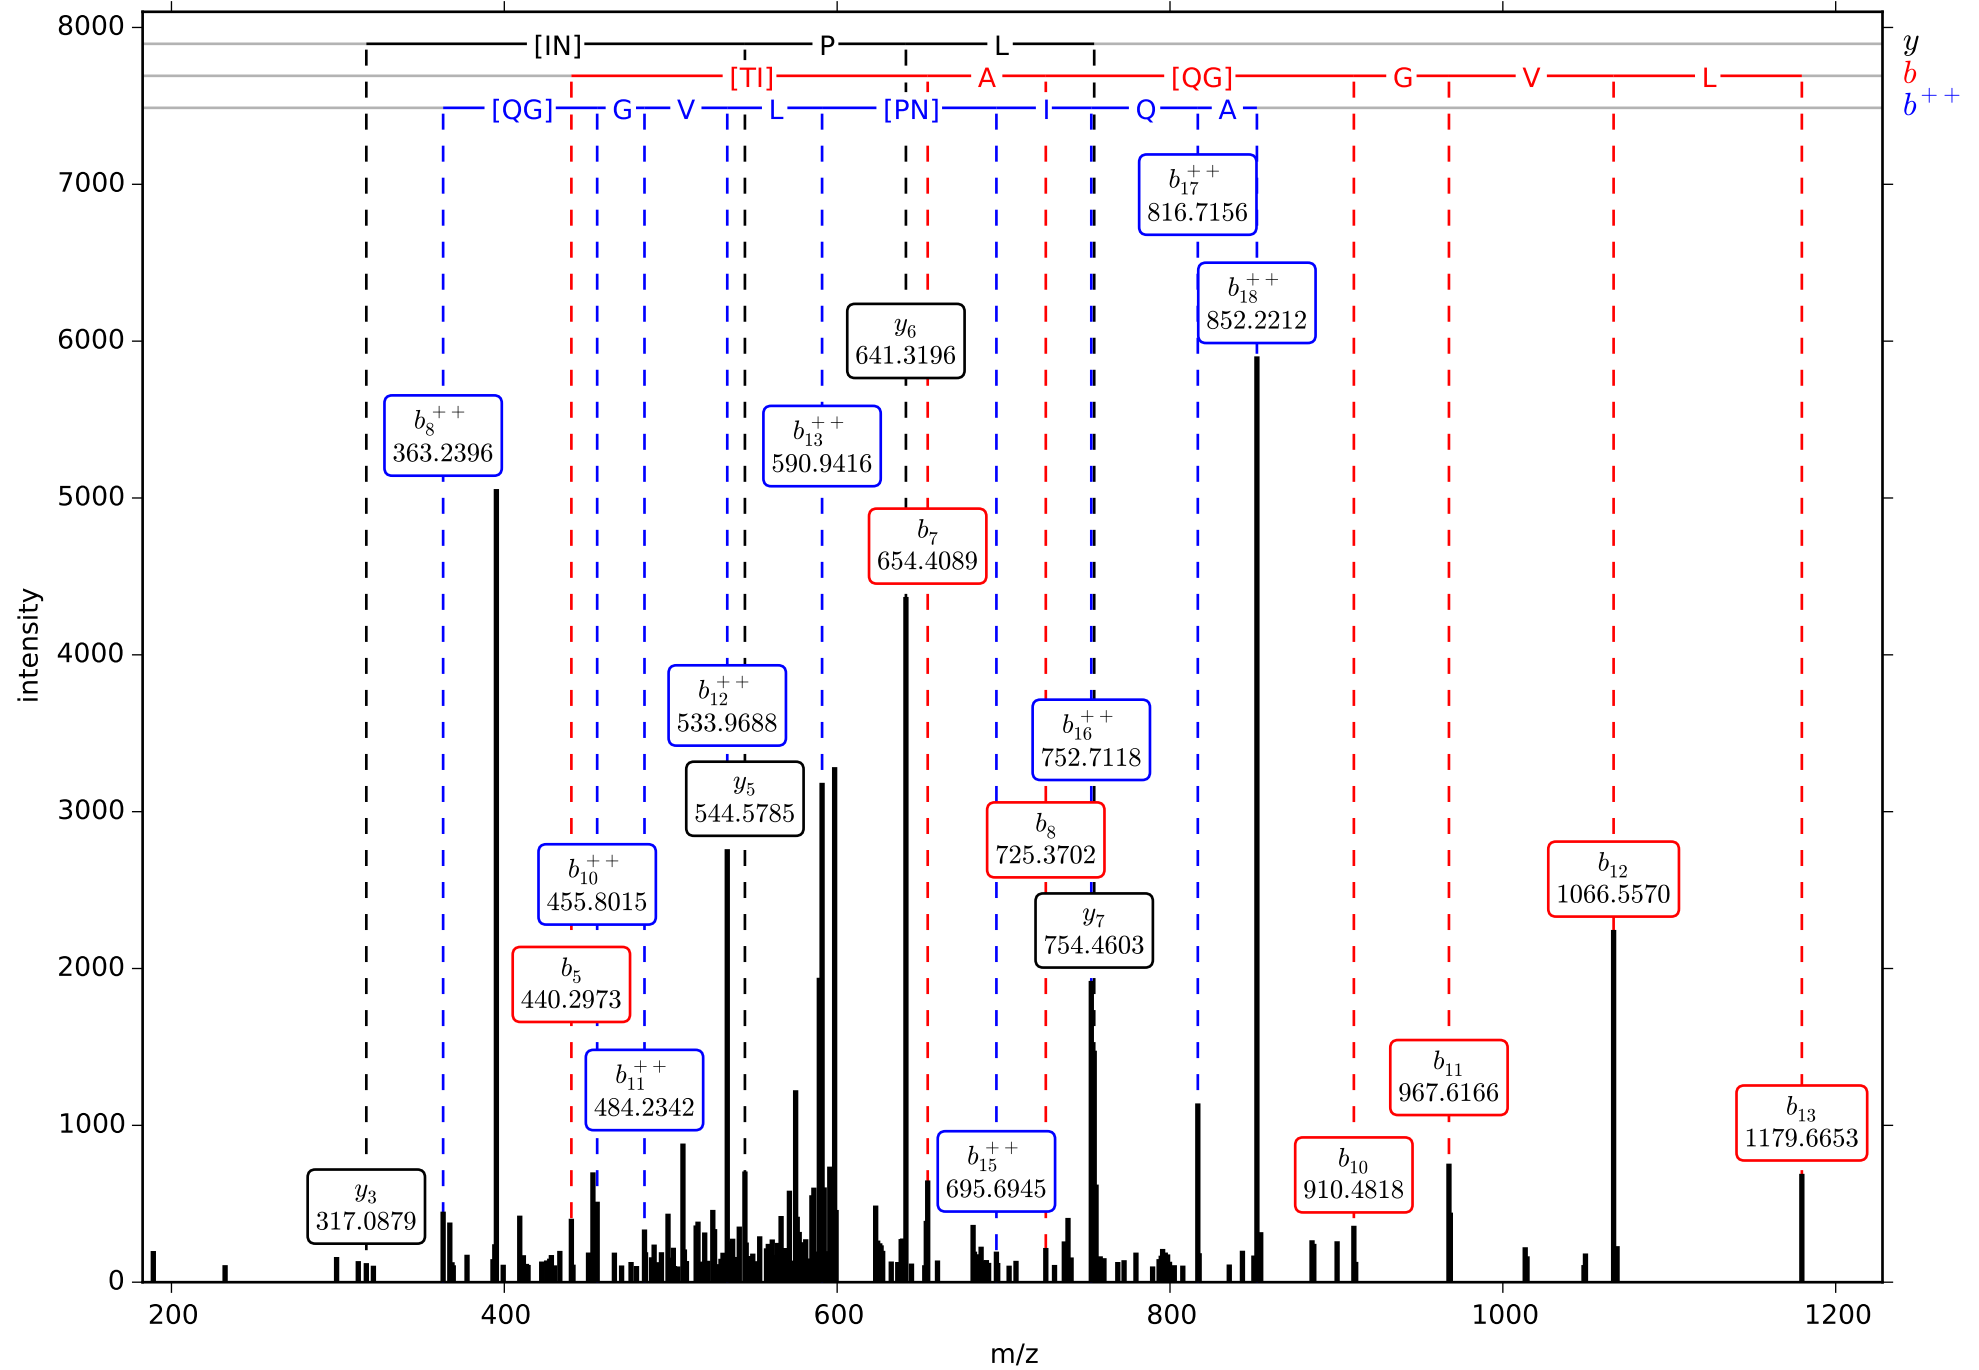

# TATESFASDPILYRPVAVALDT

parent: 1169.111115,2+

MSGFScore: 159

QValue: 0

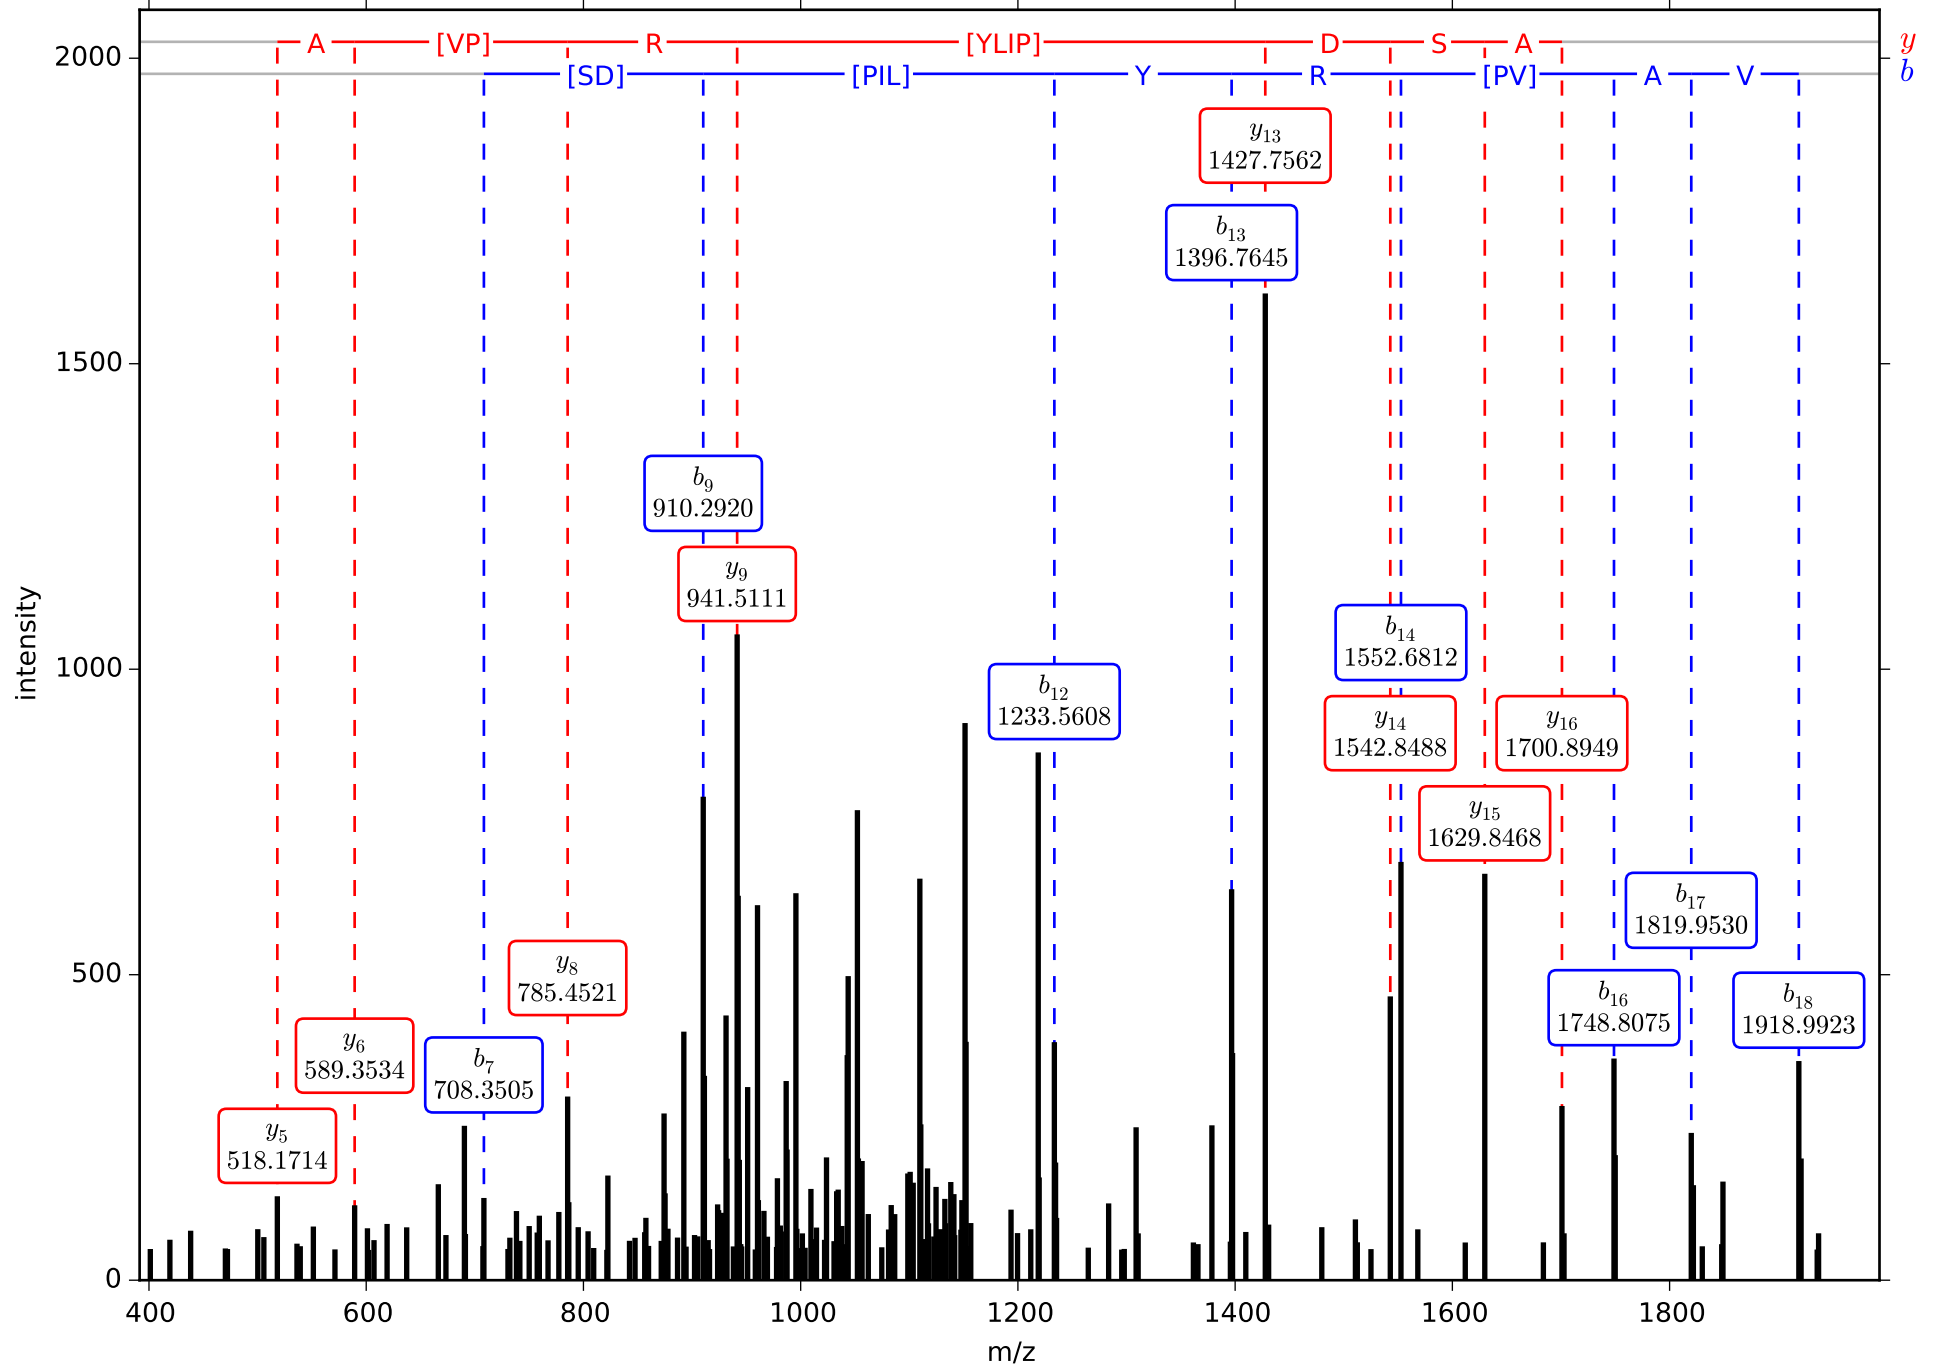

# STGEAFVQFASKEIAENA

parent: 949.966950,2+  
MSGFScore: 162  
QValue: 0

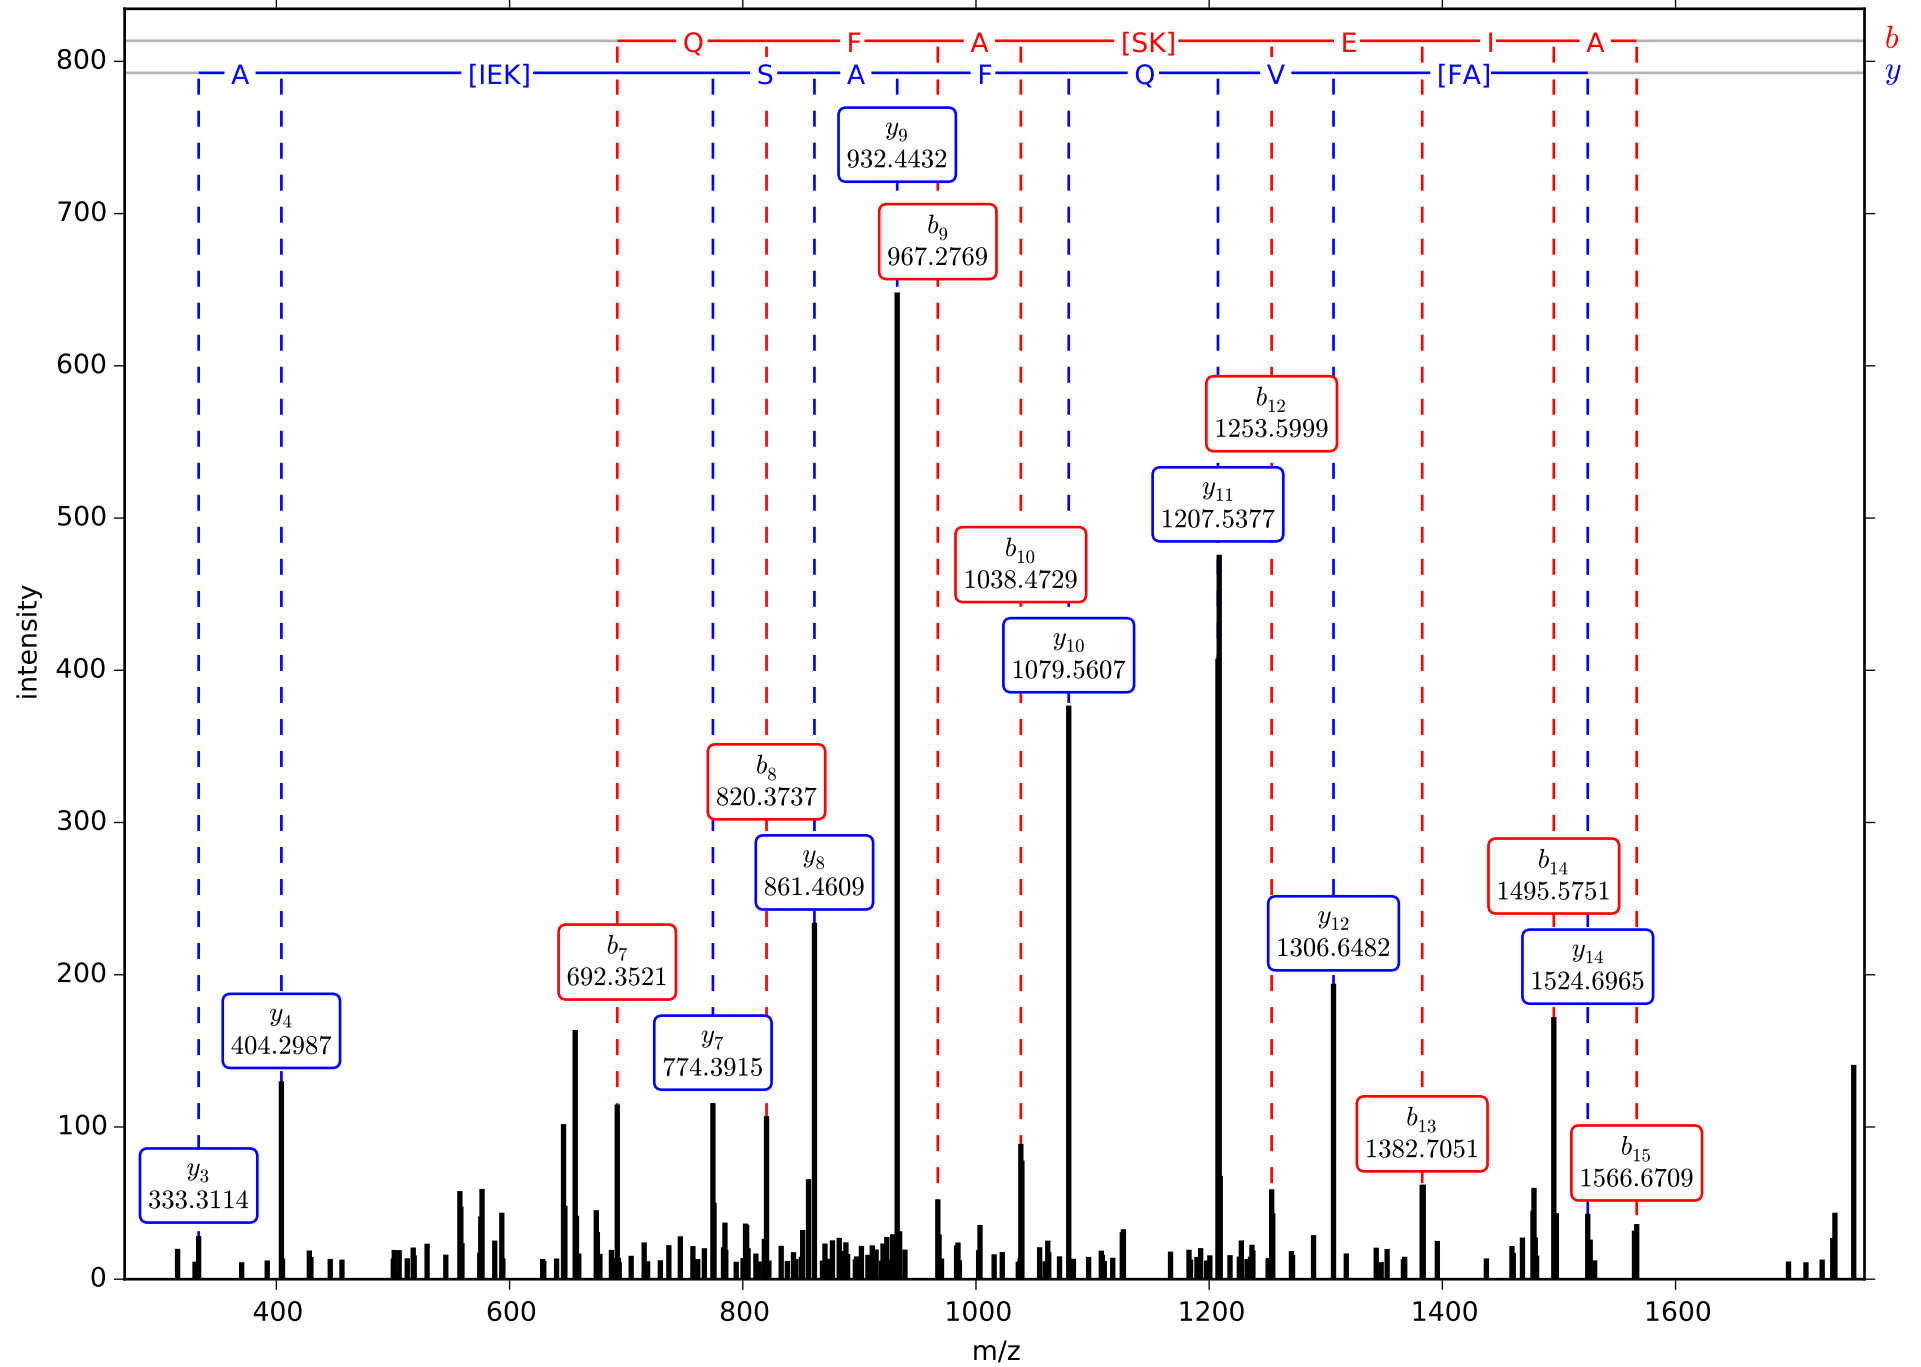

VGGTKPAGGDFGEVLNSAANASATT

parent: 764.712057,3+

MSGFScore: 171

QValue: 0.000941177

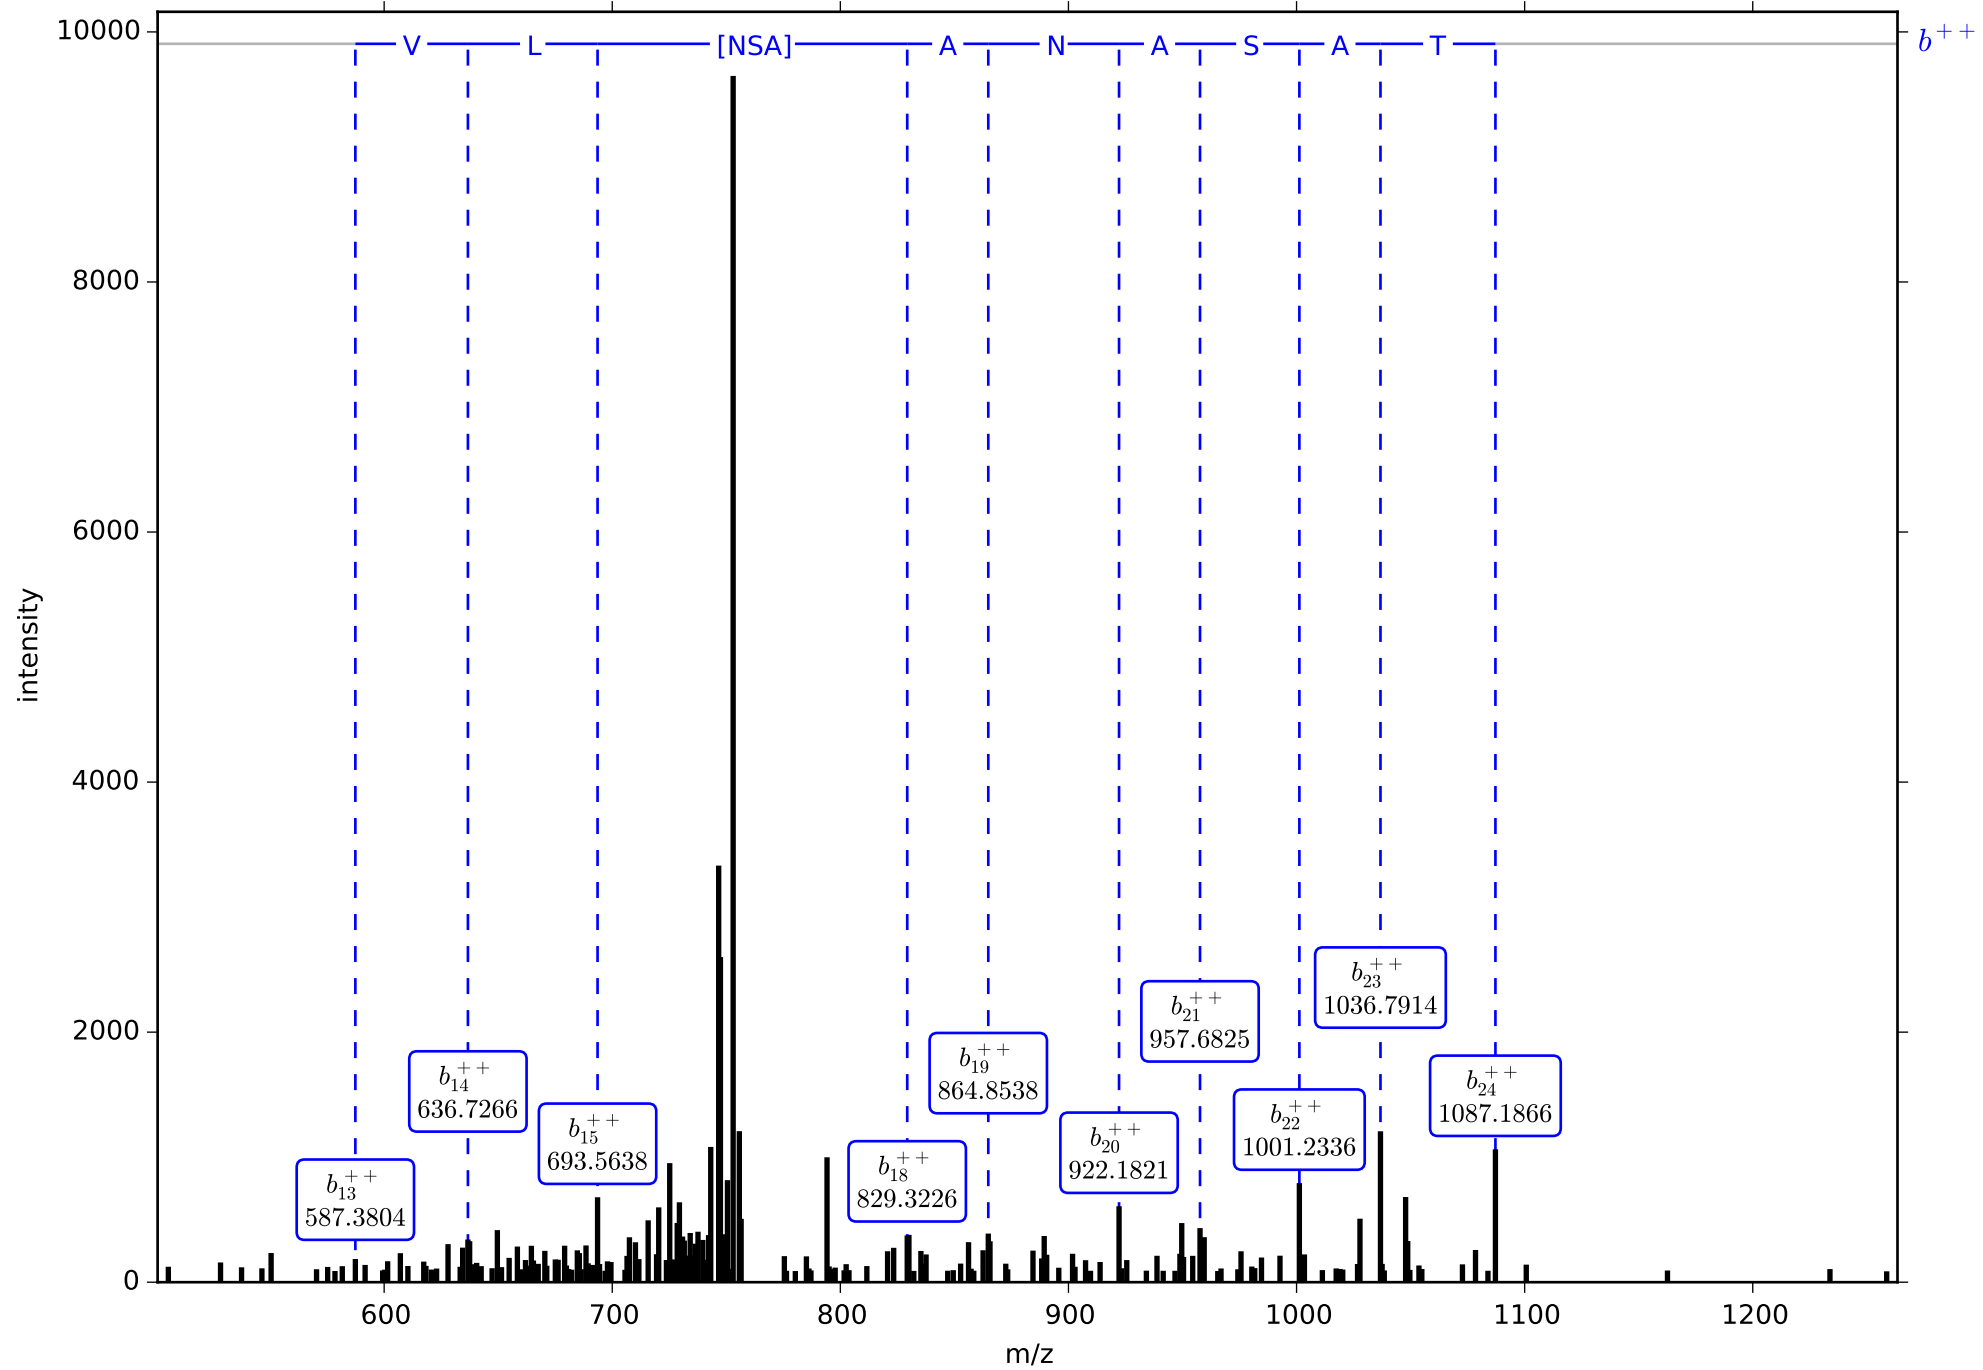



YTPSGQAGAAASESLFVSNHA

parent: 1032.984040,2+

MSGFScore: 174

QValue: 0

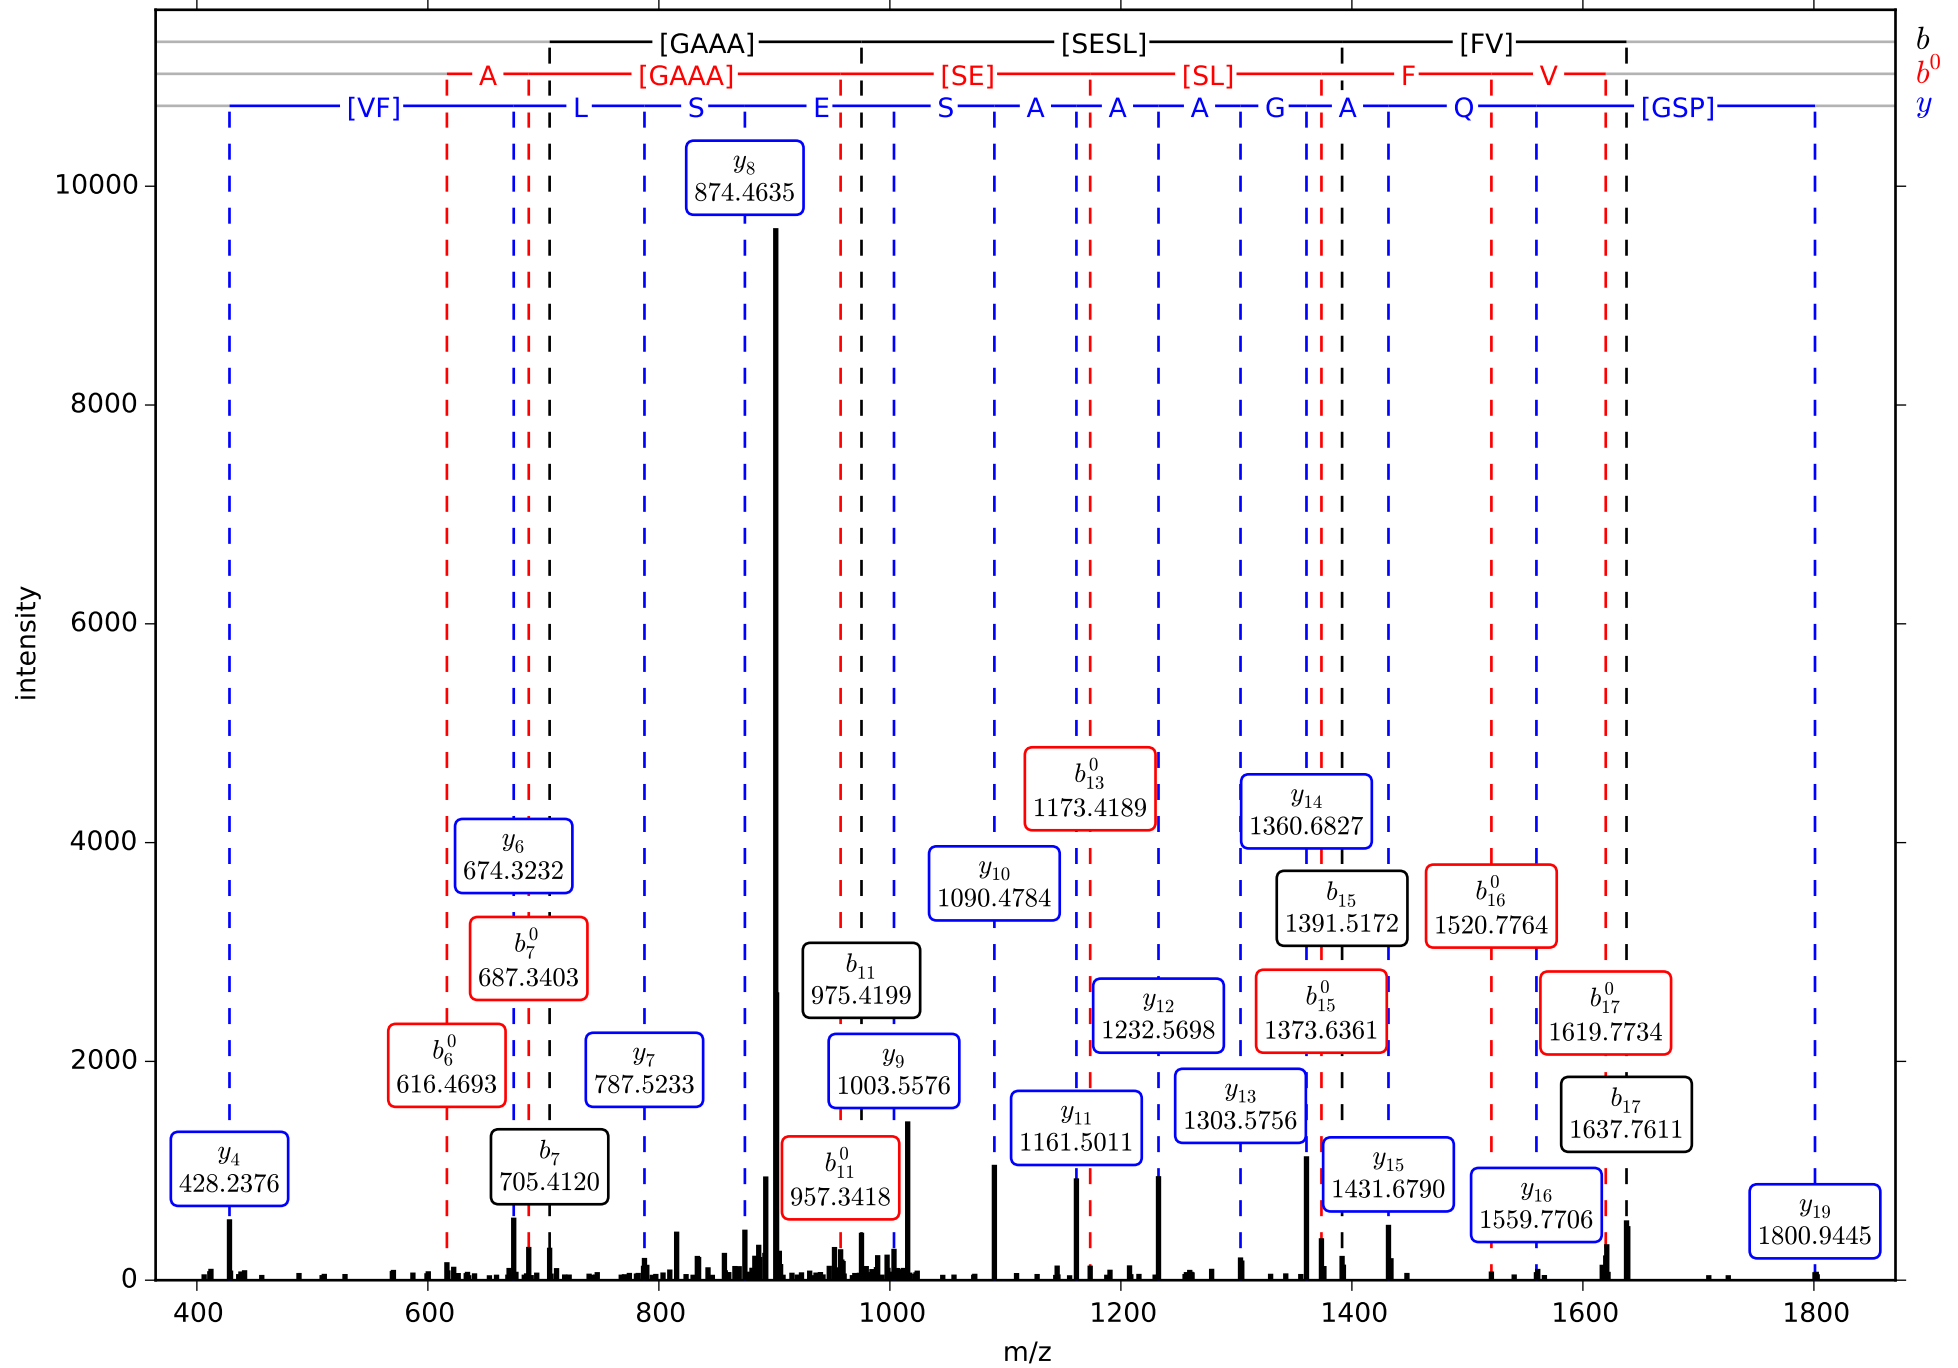

AIQLTYNPDESSKPNMIDAAT

parent: 1140.045686,2+

MSGFScore: 184

QValue: 0.00355872

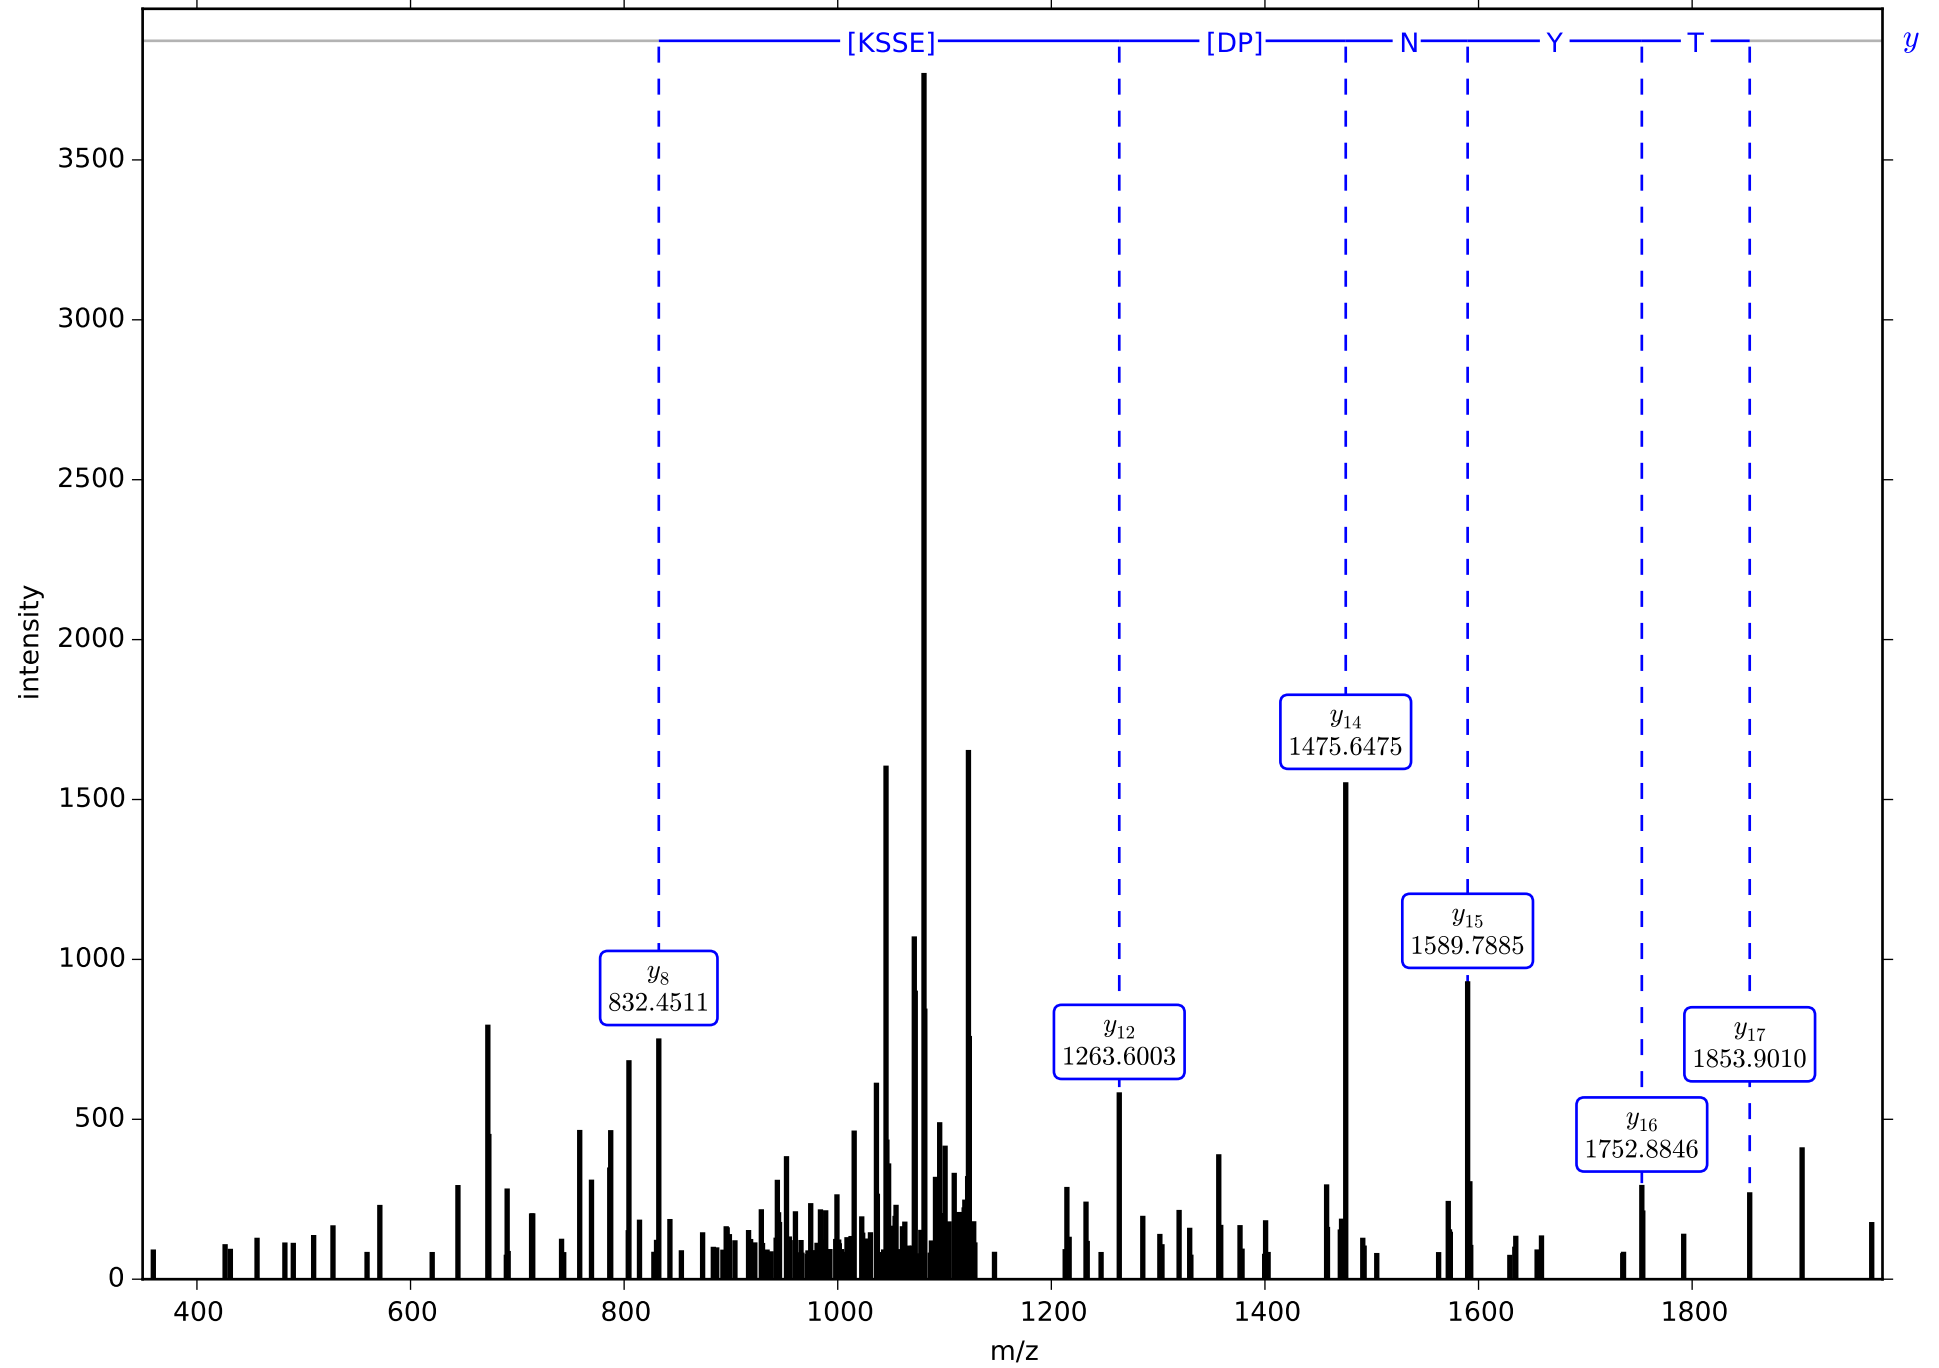

NLSTAAAAALAAAA

parent: 396.221832,3+

MSGFScore: 188

QValue: 0

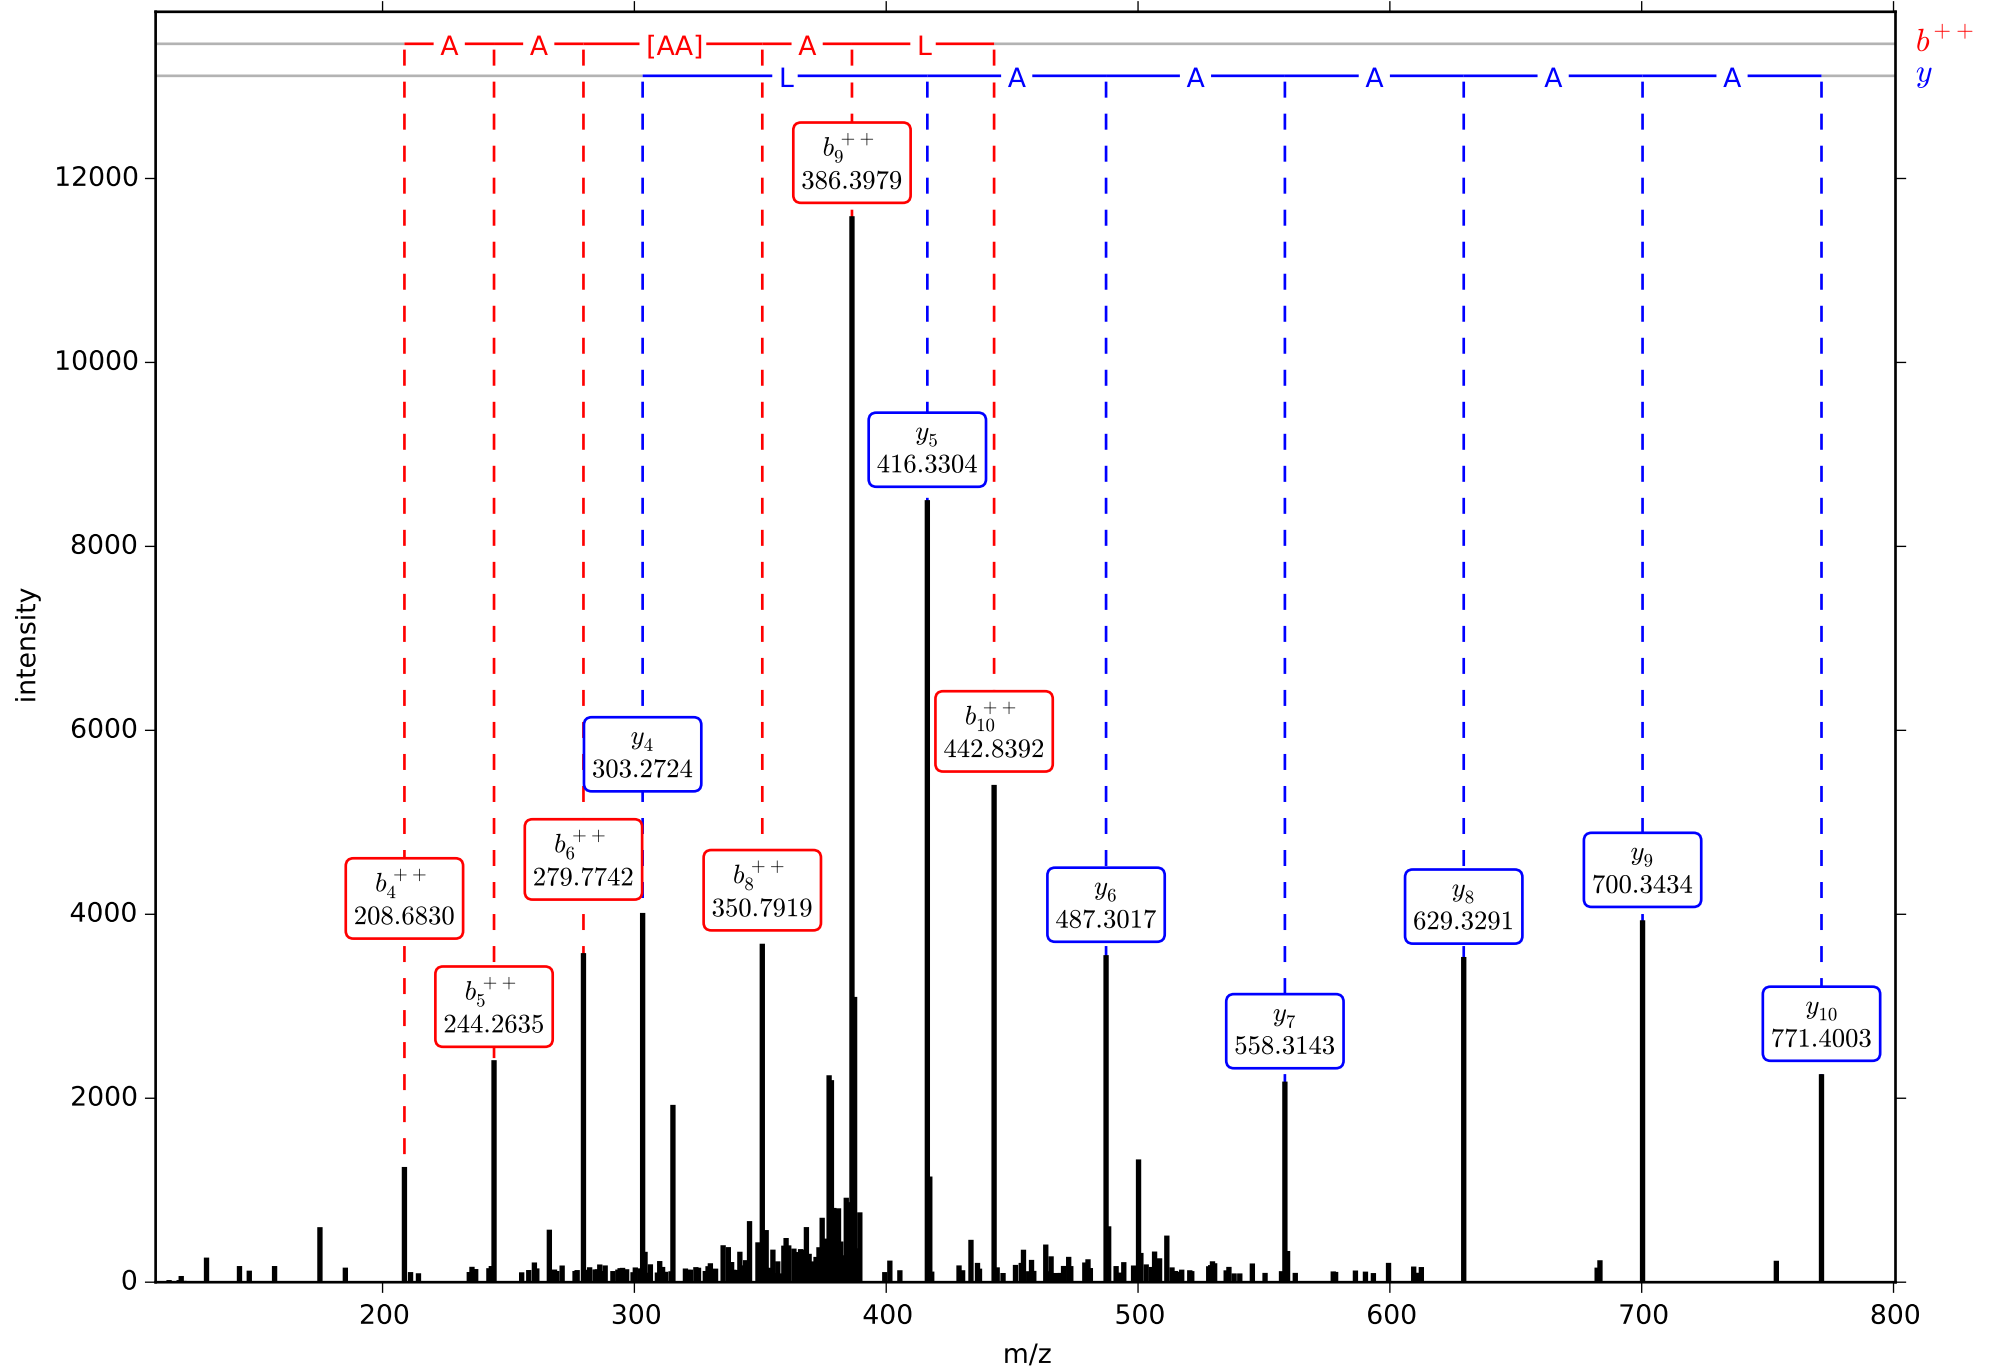

RPLEQQQPHHIPTSA PVYQQPQQQPVA

parent: 1034.870260,3+

MSGFScore: 200

QValue: 0

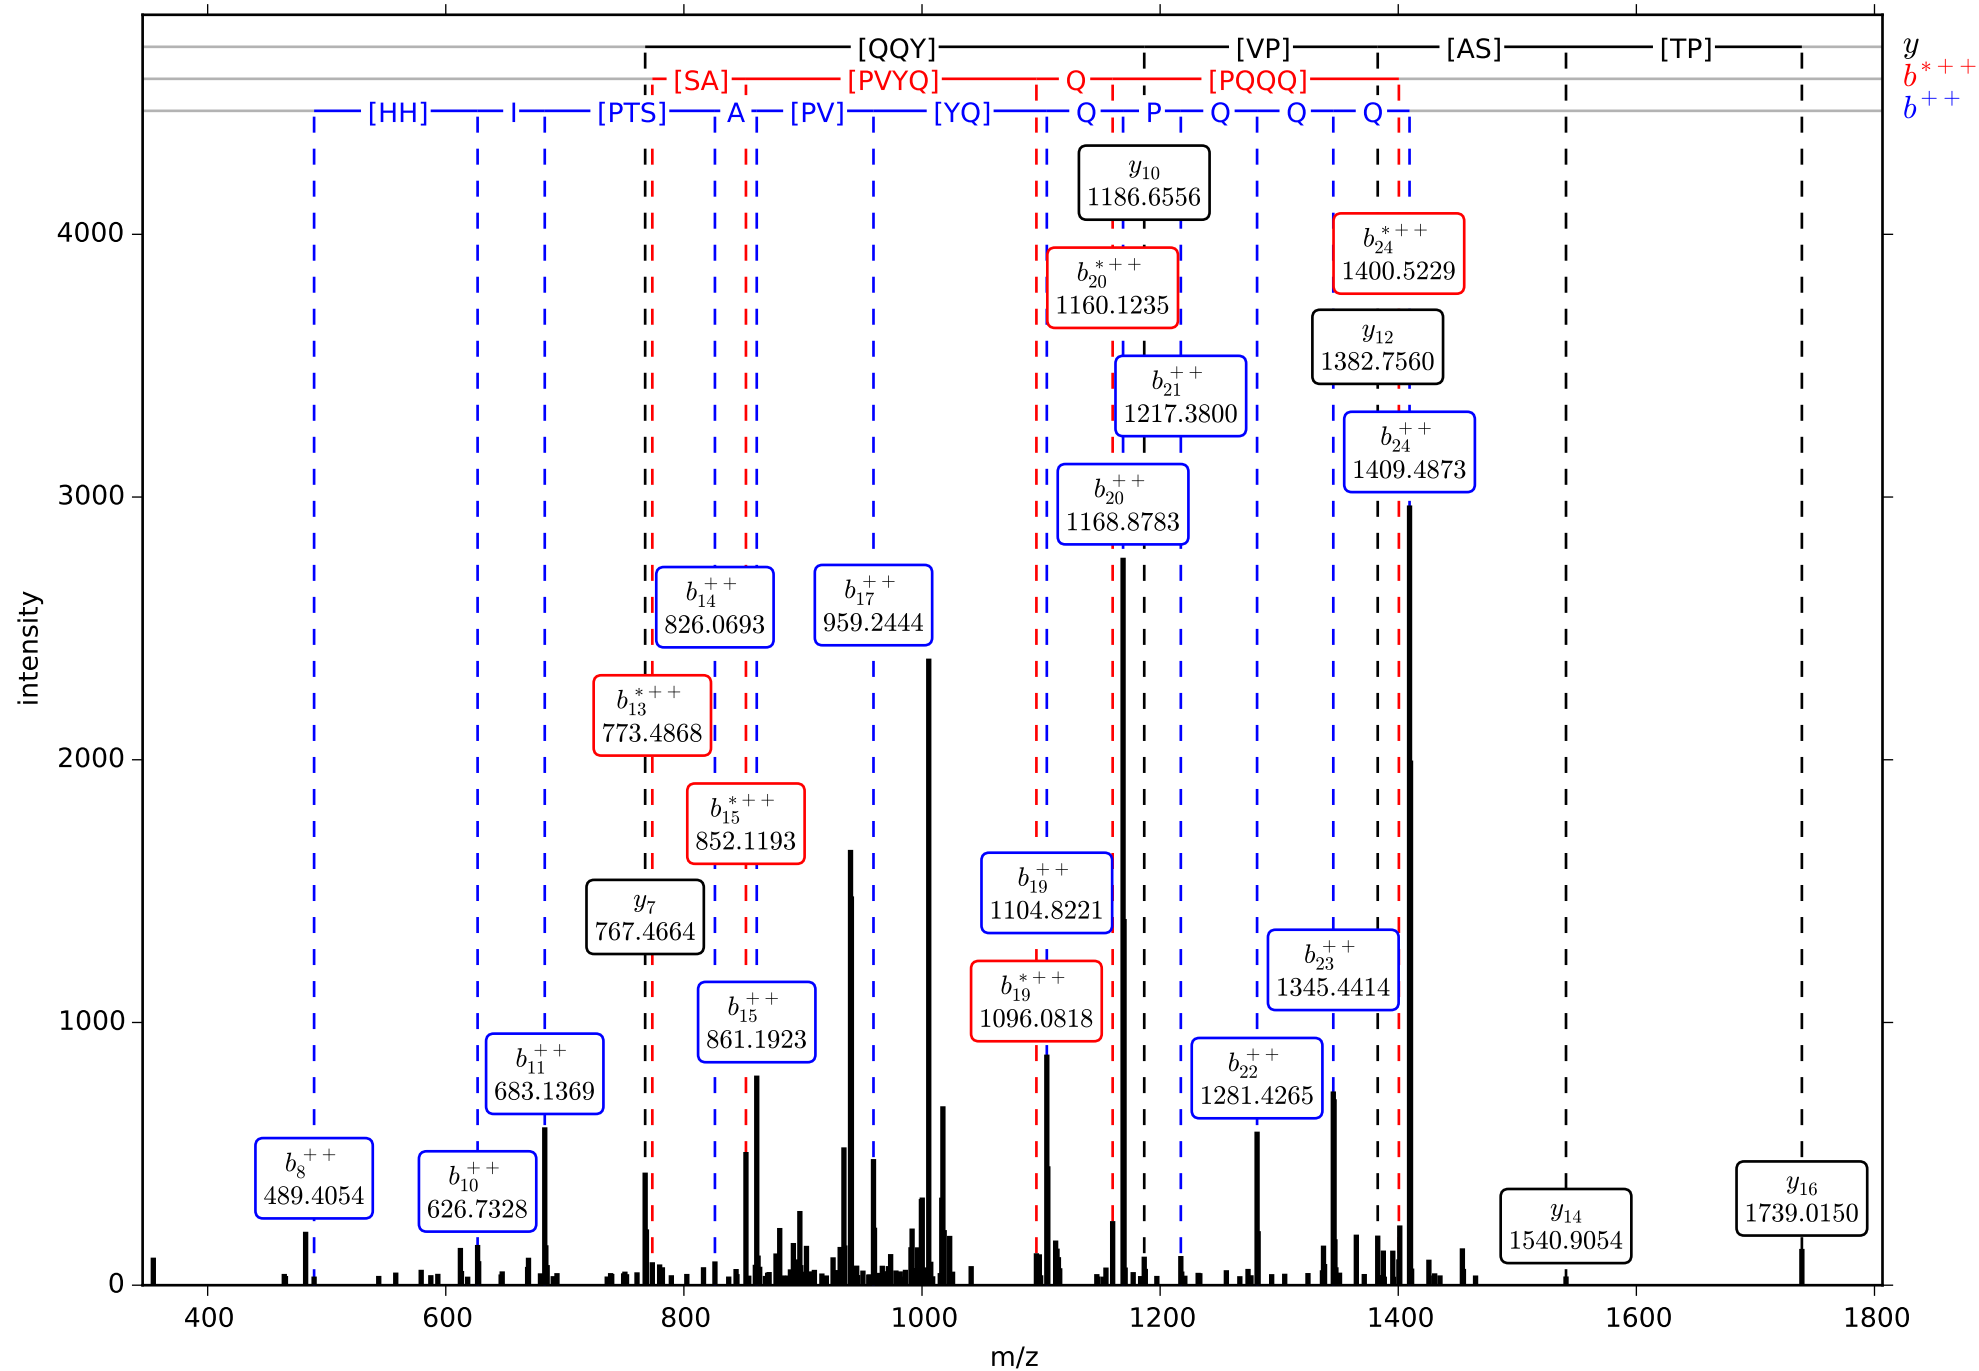

# TIETRDGEVVSEATQQQHEV

parent: 752.700745,3+

MSGFScore: 207

QValue: 0

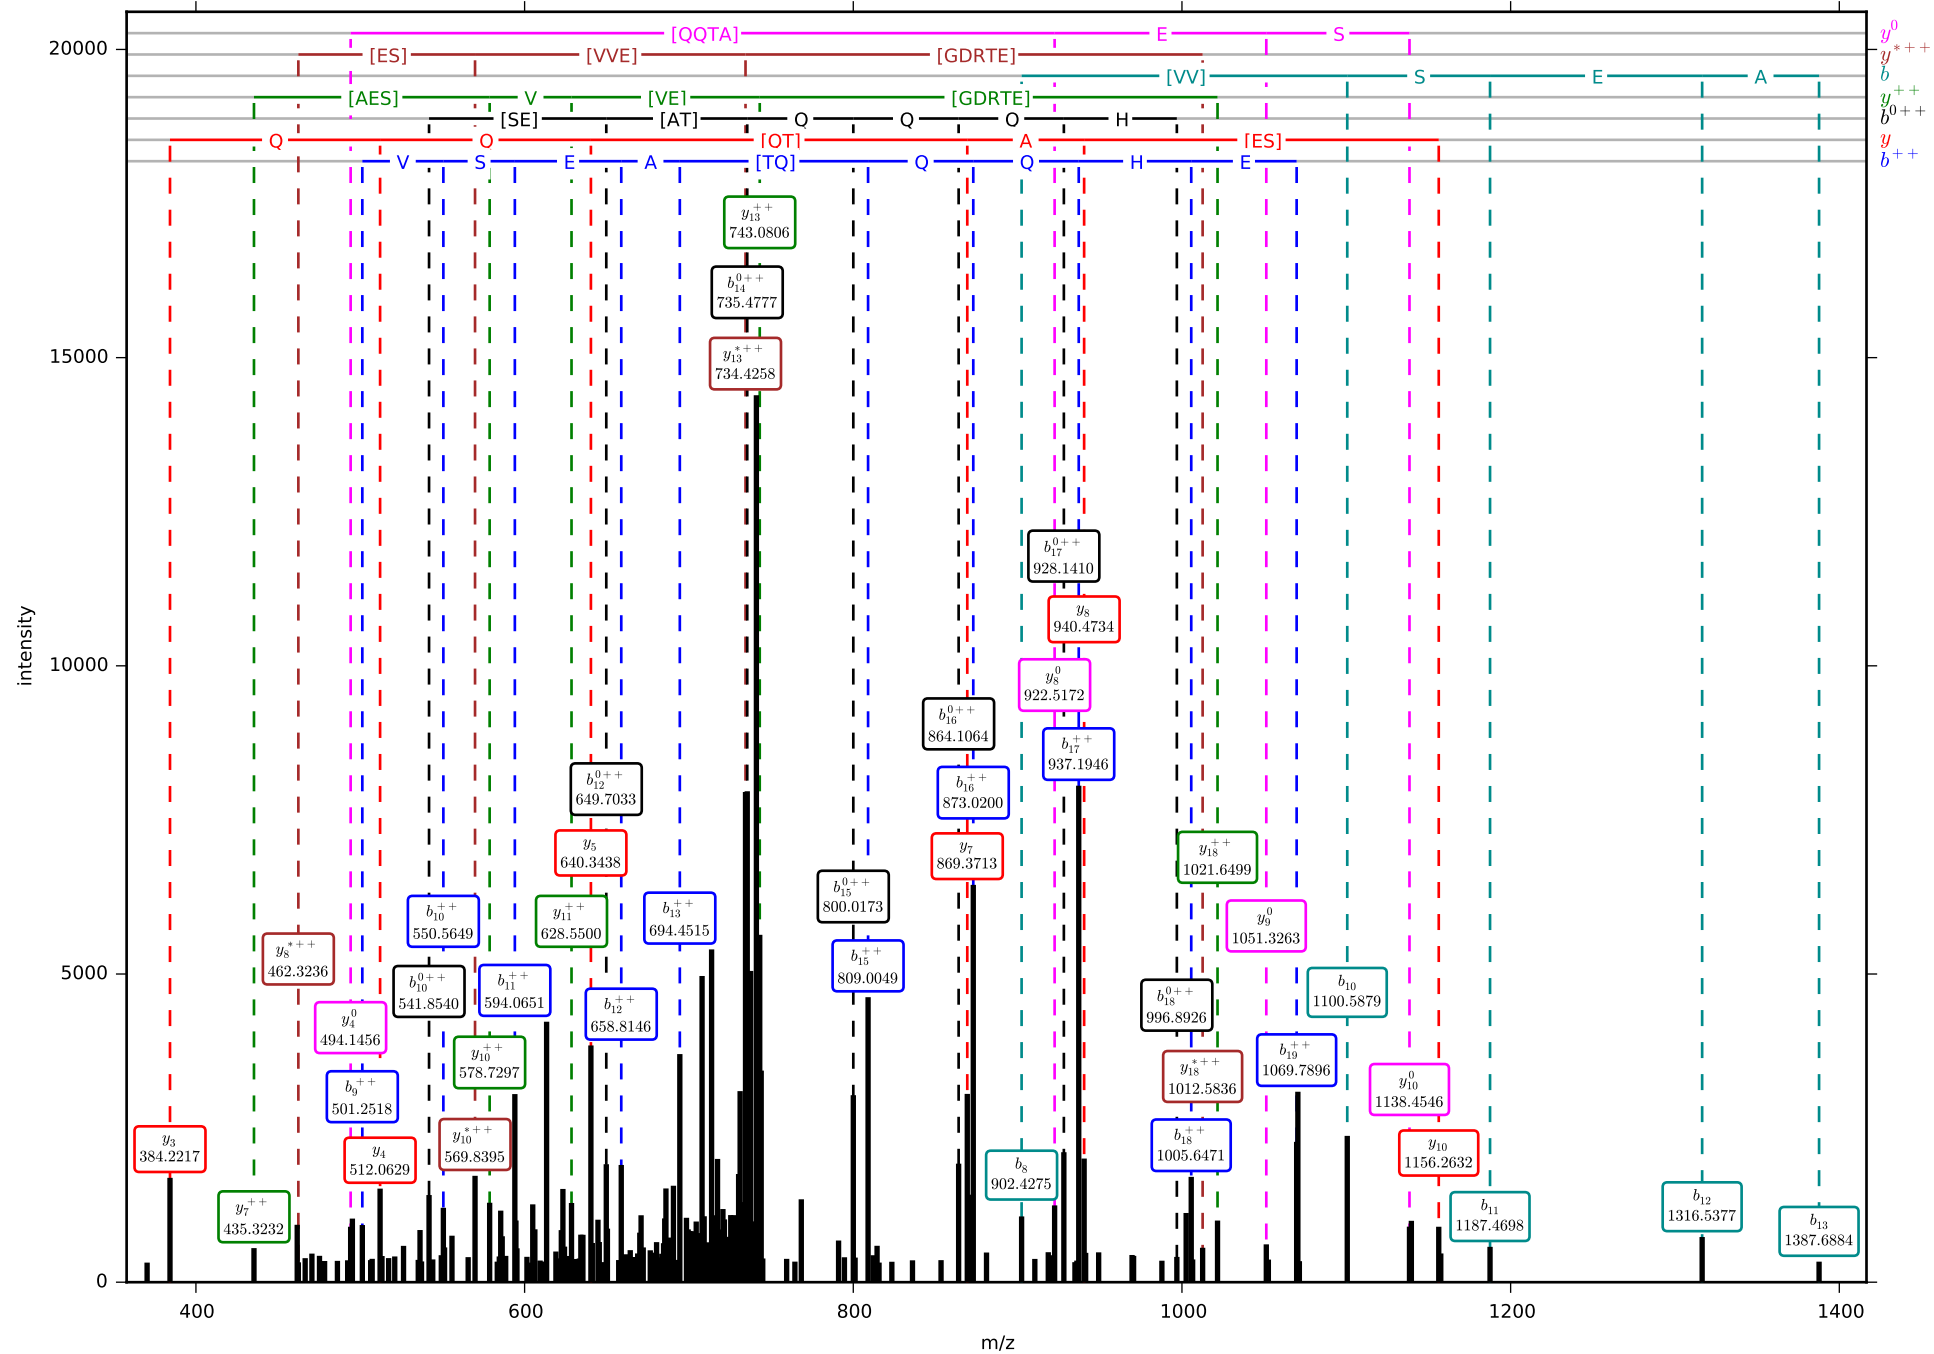

STLKPQPAPQAGPIPVAPIGTLKPQPQPVPA

parent: 1032.596334,3+

MSGFScore: 217

QValue: 0

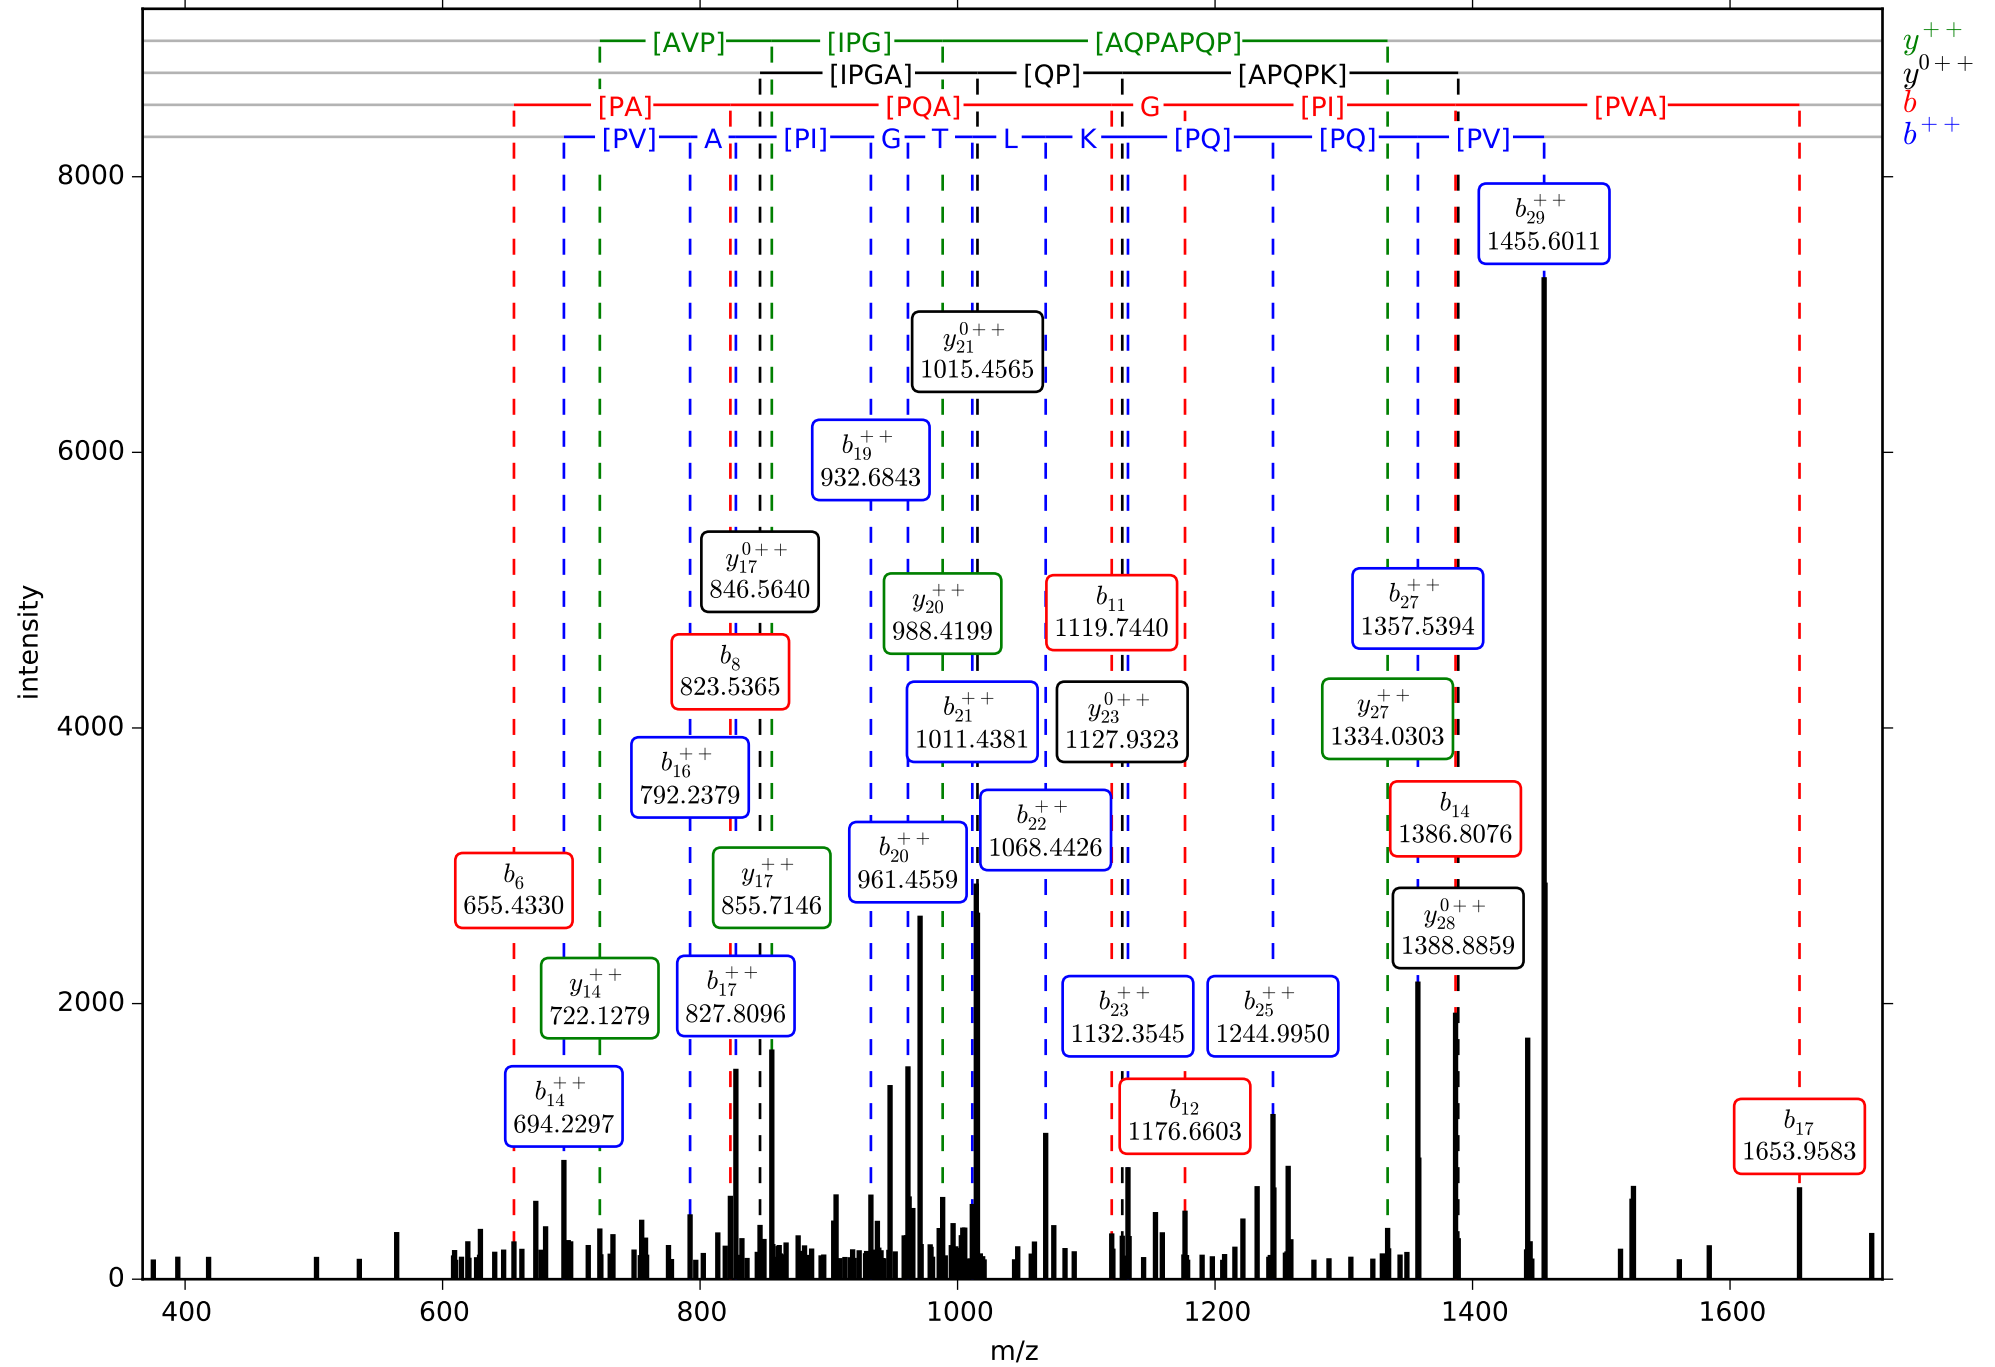

# DALDSSNSoxMQTIQK

parent: 921.459426,2+

Mascot score: 54.16

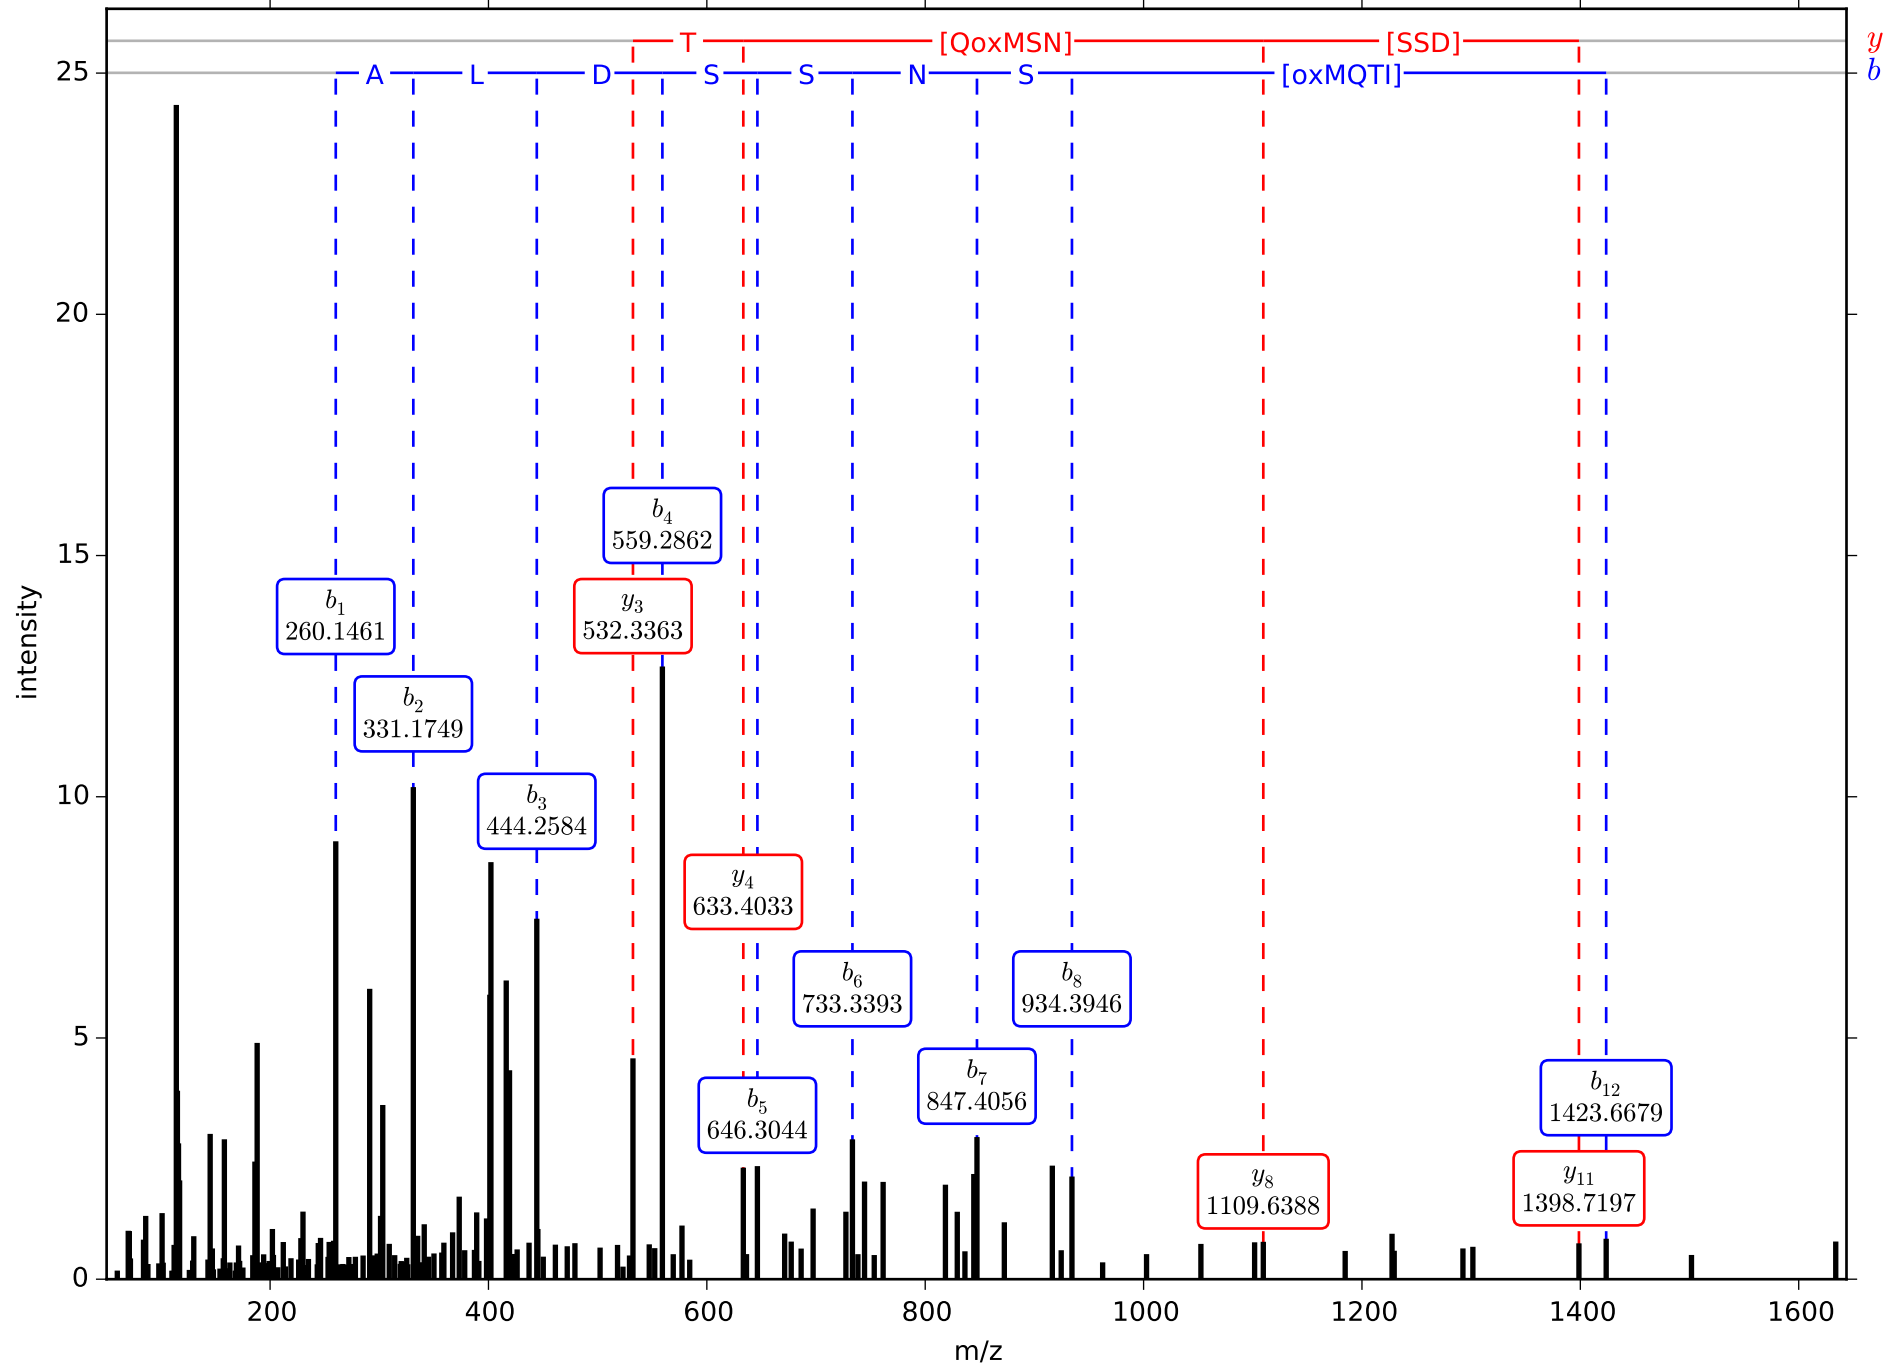

# LLEDGEDFNLG

parent: 683.347446,2+

Mascot score: 83.52

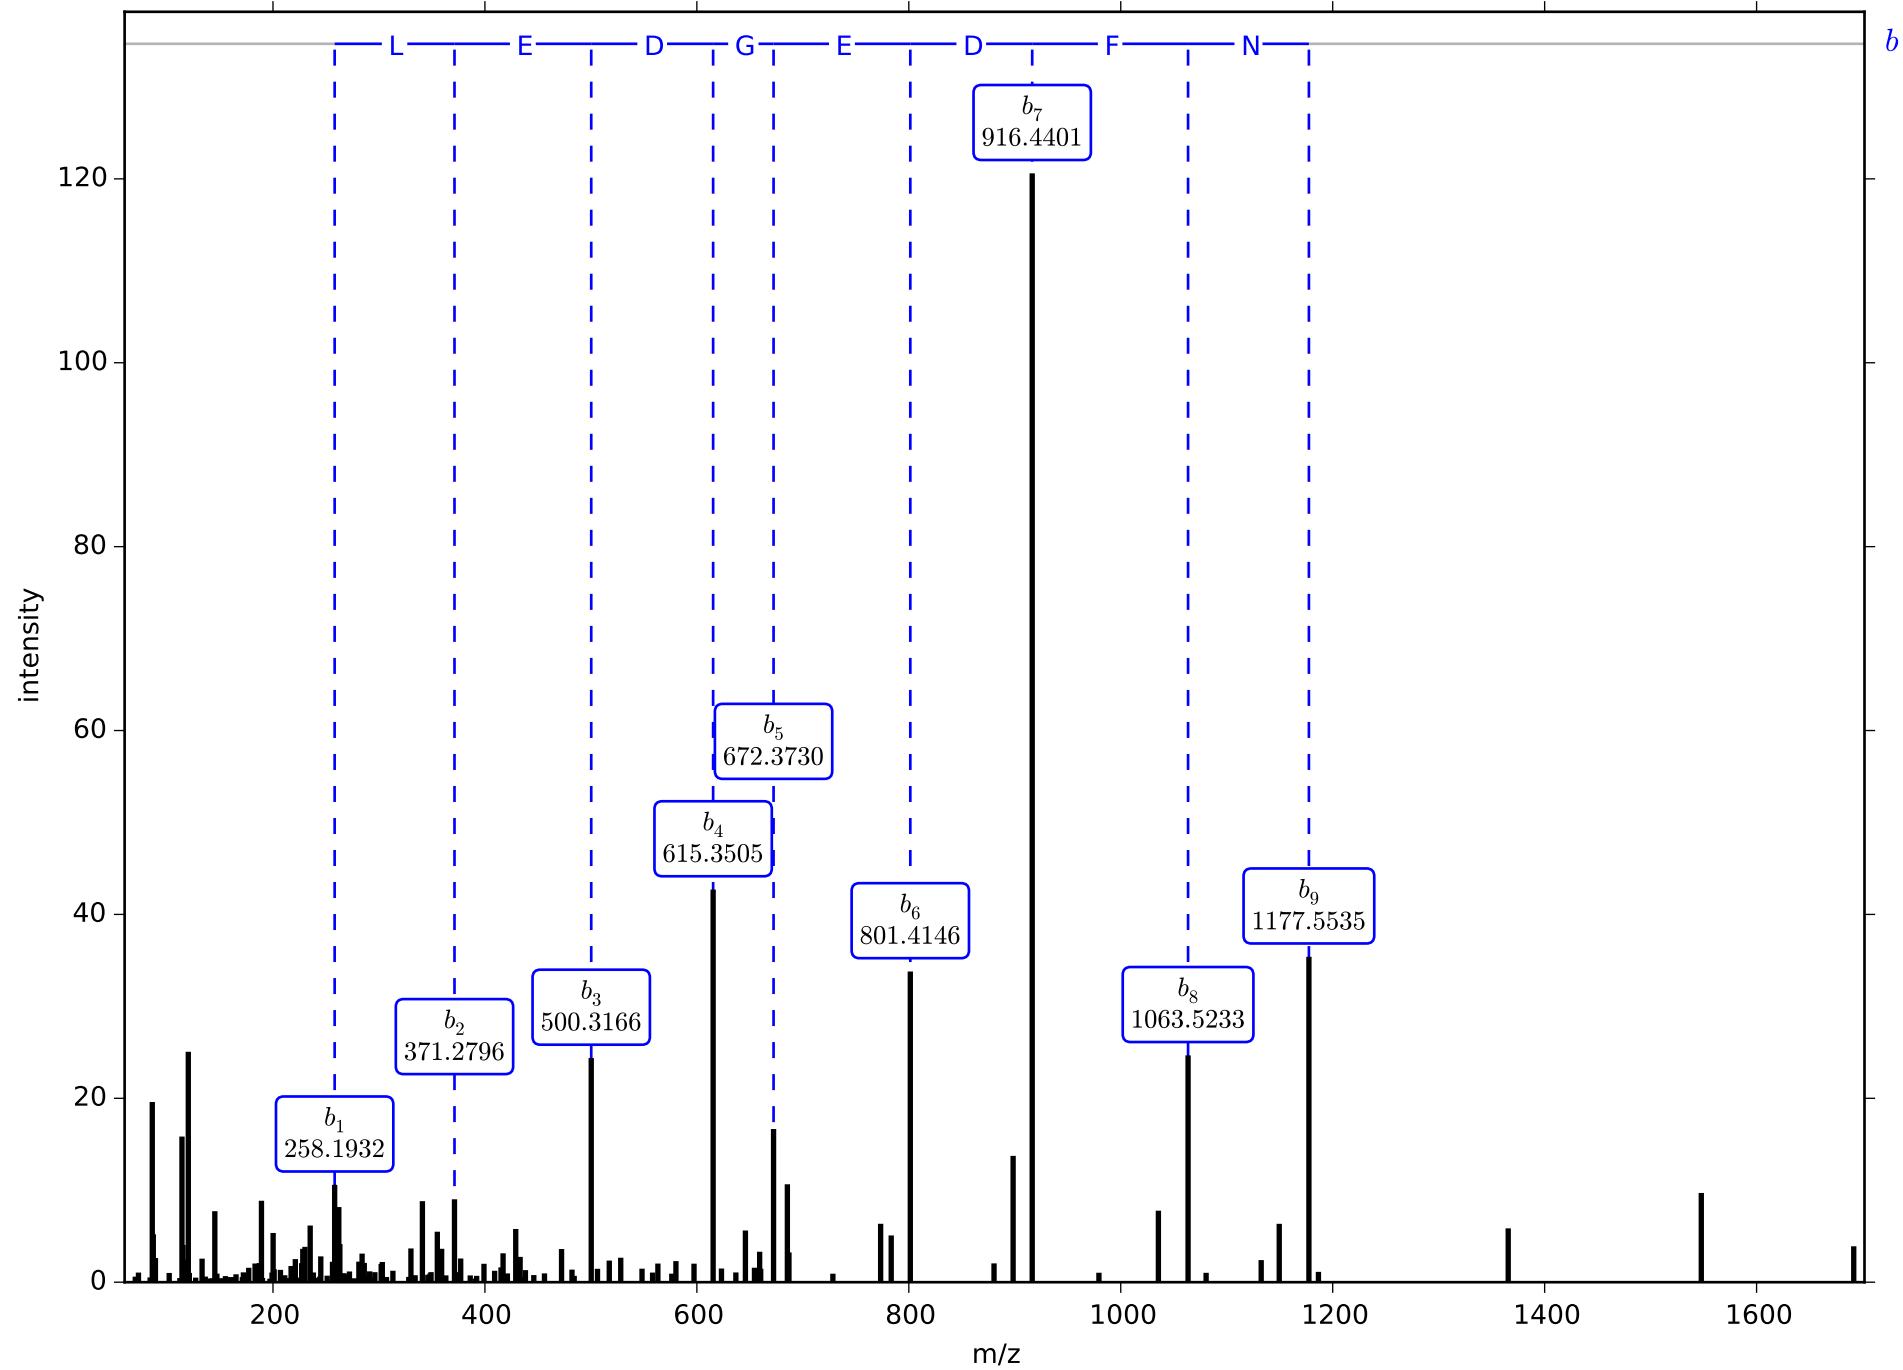



NYGSDLTGGGDLFVGNEK

parent: 1066.035341,2+

Mascot score: 67.84

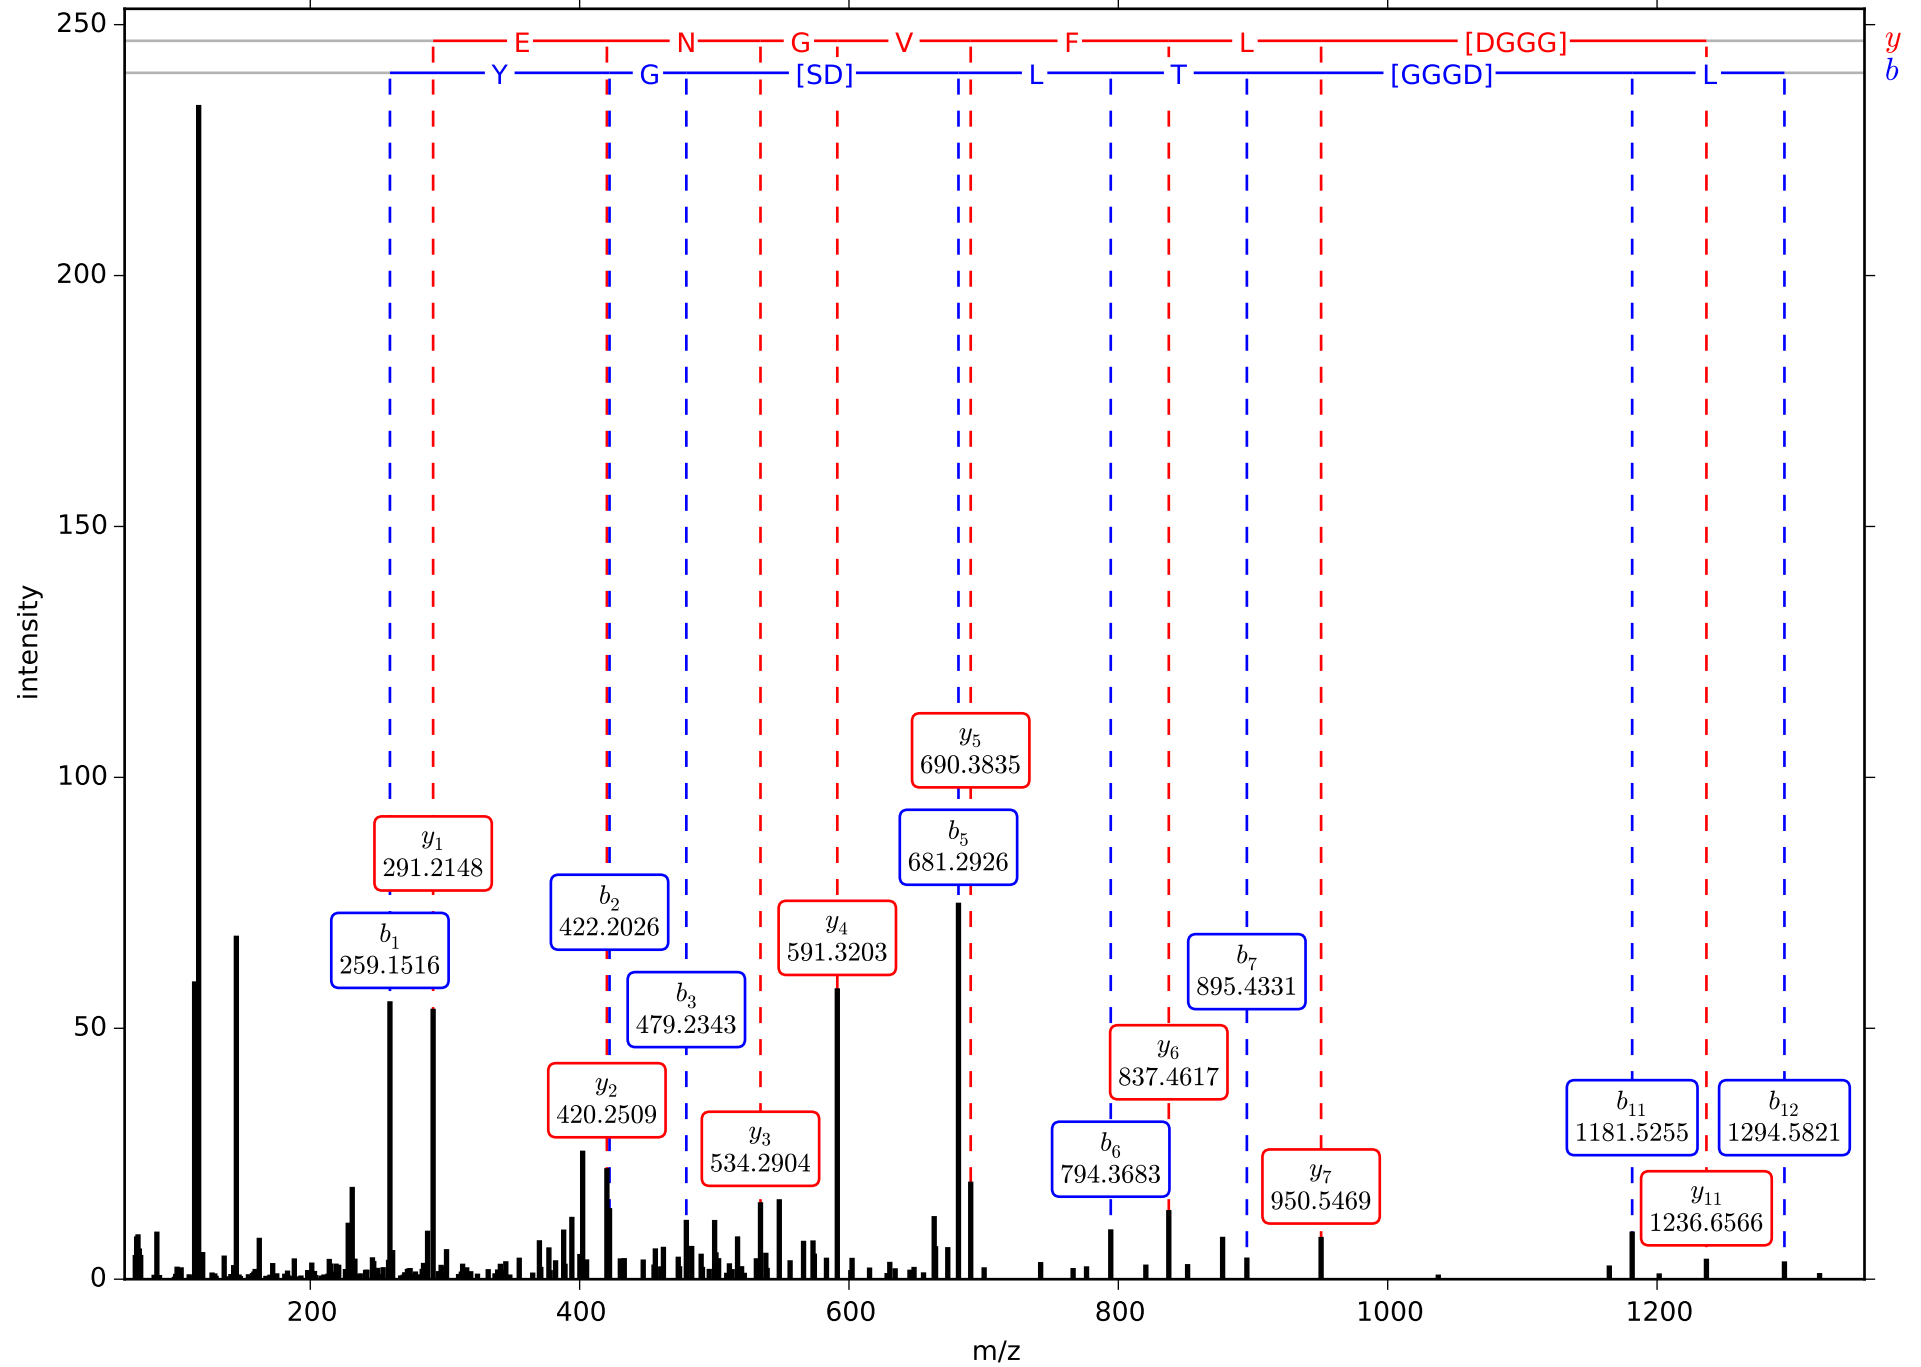

TEoxMENEFLVI

parent: 692.885930,2+

Mascot score: 58.72

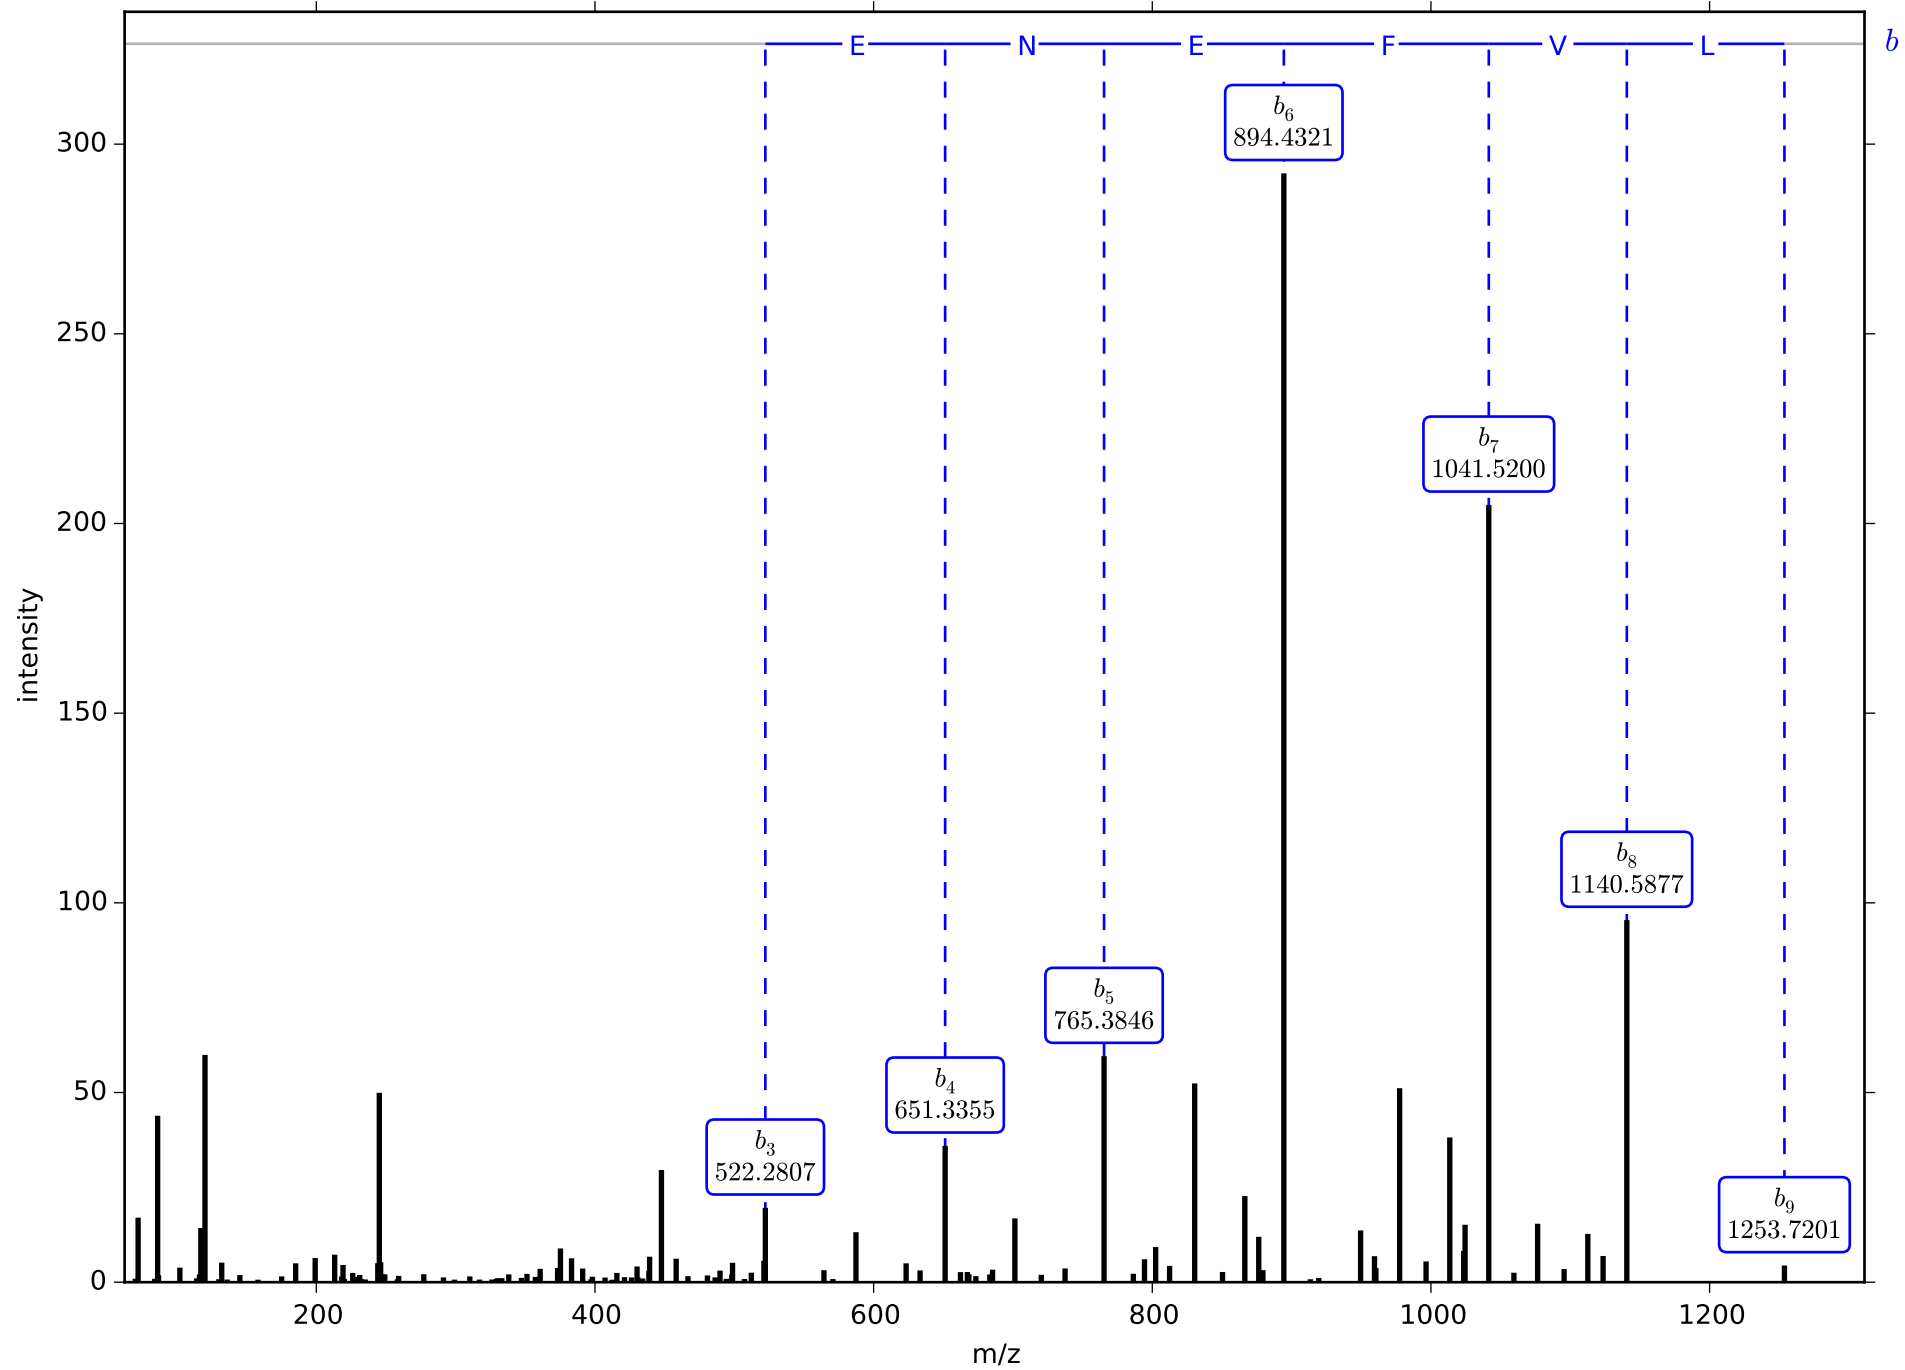

Supplement: 10.1074_M116.058818_mcp.M116.058818-2.pdf [file 10.1074_M116.058818_mcp.M116.058818-2.pdf]
